# Supplementary material for: Ferrocene-based conjugated macrocycles: shotgun synthesis, size-dependent properties and tunable fluorescence intensity
Source: Royal Society of Chemistry journal article supplement (doi:10.1039/d4qo01079e), 2024-01-01
Supplement: d4qo01079e1.pdf [file d4qo01079e1.pdf]

Supporting Information for

## **Ferrocene-based Conjugated Macrocycles: Shotgun Synthesis, Size-dependent Properties and Tunable Fluorescence Intensity**

Lingyun Zhu<sup>+</sup>, Jingdong Xu<sup>+</sup>, Bin Lan, Hui Xu, Xinyu Chen, Hideya Kono, Jianfeng Yan, Wenjuan Li, Akiko Yagi, Yaofeng Yuan, Kenichiro Itami and Yuanming Li\*

[\*] L. Zhu, J. Xu, B. Lan, H. Xu, X. Chen, Dr. J. Yan, Prof. Dr. Y. Yuan, Prof. Dr. Y. Li

Key Laboratory of Molecule Synthesis and Function Discovery (Fujian Province University), Fuzhou University, Fuzhou 350108, China.

E-mail: yuanming.li@fzu.edu.cn

H. Kono, Prof. Dr. A. Yagi, Prof. Dr. K. Itami

Institute of Transformative Bio-Molecules (WPI-ITbM), Nagoya University, Chikusa, Nagoya 464-8602 (Japan)

Dr. W. Li

Henan Key Laboratory of Biomolecular Recognition and Sensing, College of Chemistry and Chemical Engineering, Shangqiu Normal University, Shangqiu 476000, China

[+] These authors contributed equally to this work.

## Content

|                                                                                           |           |
|-------------------------------------------------------------------------------------------|-----------|
| <b>1. General</b> .....                                                                   | <b>3</b>  |
| <b>2. Synthesis</b> .....                                                                 | <b>4</b>  |
| <b>3. X-Ray Crystallography</b> .....                                                     | <b>9</b>  |
| <b>4. Density Functional Theory (DFT) Computational Details</b> .....                     | <b>12</b> |
| 4.1 TD-DFT calculation.....                                                               | 13        |
| 4.2 Strain energy calculation .....                                                       | 16        |
| 4.3 Relative energy in the rotation process of <b>Fc-[8]CPP</b> .....                     | 20        |
| 4.4 Oxidation state optimization of <b>Fc-CPPs</b> .....                                  | 21        |
| <b>5. Variable temperature NMR (VT-NMR) of Fc-[8]CPP</b> .....                            | <b>23</b> |
| <b>6. Redox property of Fc-[8]CPP</b> .....                                               | <b>23</b> |
| <b>7. Oxidation titration of Fc-[11]CPP</b> .....                                         | <b>26</b> |
| <b>8. UV-Vis spectra titration of fullerenes to Fc-CPPs</b> .....                         | <b>26</b> |
| <b>9. <math>K_{sv}</math> curve in titration process of Fc-CPPs with fullerenes</b> ..... | <b>27</b> |
| <b>10. Cartesian coordinates of optimized structures</b> .....                            | <b>28</b> |
| <b>11. Reference</b> .....                                                                | <b>58</b> |
| <b>12. NMR spectra</b> .....                                                              | <b>59</b> |
| <b>13. High-resolution mass spectra (HRMS)</b> .....                                      | <b>69</b> |
| <b>14. Maldi-tof mass spectra (HRMS)</b> .....                                            | <b>71</b> |

## 1. General

1,3-diiodoferrocene (**1**) was synthesized as reported<sup>[S1]</sup>, and other materials were purchased from commercial without further purification. <sup>1</sup>H and <sup>13</sup>C NMR spectra were recorded at 298 K on a JNM-ECZ500R and JNM-ECZ600R instrument. The residual deuterated solvent signal was used as the internal reference in NMR spectra (CDCl<sub>3</sub> δ [ppm] = 7.26 for <sup>1</sup>H NMR, δ [ppm] = 77.16 for <sup>13</sup>C NMR). High-resolution mass spectra (HRMS) were acquired on the Thermo Scientific Exactive Plus Mass spectrometer equipped with an electrospray ionization (ESI) source. Matrix-assisted laser desorption ionization–time of flight mass spectrometry (MALDI-TOF MS) was acquired on Bruker autoflex maX MALDI-TOF MS spectrometer. Electron Paramagnetic Resonance (EPR) Spectroscopy was recorded at 298 K on a Bruker A300 instrument. Single-crystal X-ray data were collected at 100 K on a Synergy Custom (Liquid MetalJet D2+) diffractometer equipped with Ga-Kα (λ = 1.34050) and reduction was performed by using the program CrysAlisPro.<sup>[S2]</sup> The structures were solved by the direct method and refined by full-matrix least-squares on F<sup>2</sup> using SHELXTL and OLEX2.<sup>[S3]</sup> The UV-Vis spectra were recorded on a UV 2700 spectrometer and steady-state emission spectra were acquired using Hitachi Instruments, F-7000 spectrometer. Transient emission spectra were acquired using Edinburgh Instruments, FLS980 spectrometer equipped with a 340 nm laser. The UV-Vis-NIR spectra were recorded on Perkins Elmer Lambda 900 spectrometer. The fluorescence quantum yields were determined using a Hamamatsu absolute PL quantum yield spectrometer C11347 Quantaaurus-QY (Hamamatsu, Japan). The CV and DPV were recorded on Matrohm Autolab and CHI 760E potentiostat (Chinstruments), working electrode: glassy carbon; counter electrode: Pt; reference electrode: Ag/AgCl, scan ratio: 100 mV/s, concentration: 0.1 mM unless otherwise specified. The measurements were carried out in Bu<sub>4</sub>NPF<sub>6</sub> (0.1 M) as a supporting electrolyte. Oxidation titrations were measured 30 minutes after the addition of the oxidizing reagent (AgSbF<sub>6</sub>).

## 2. Synthesis

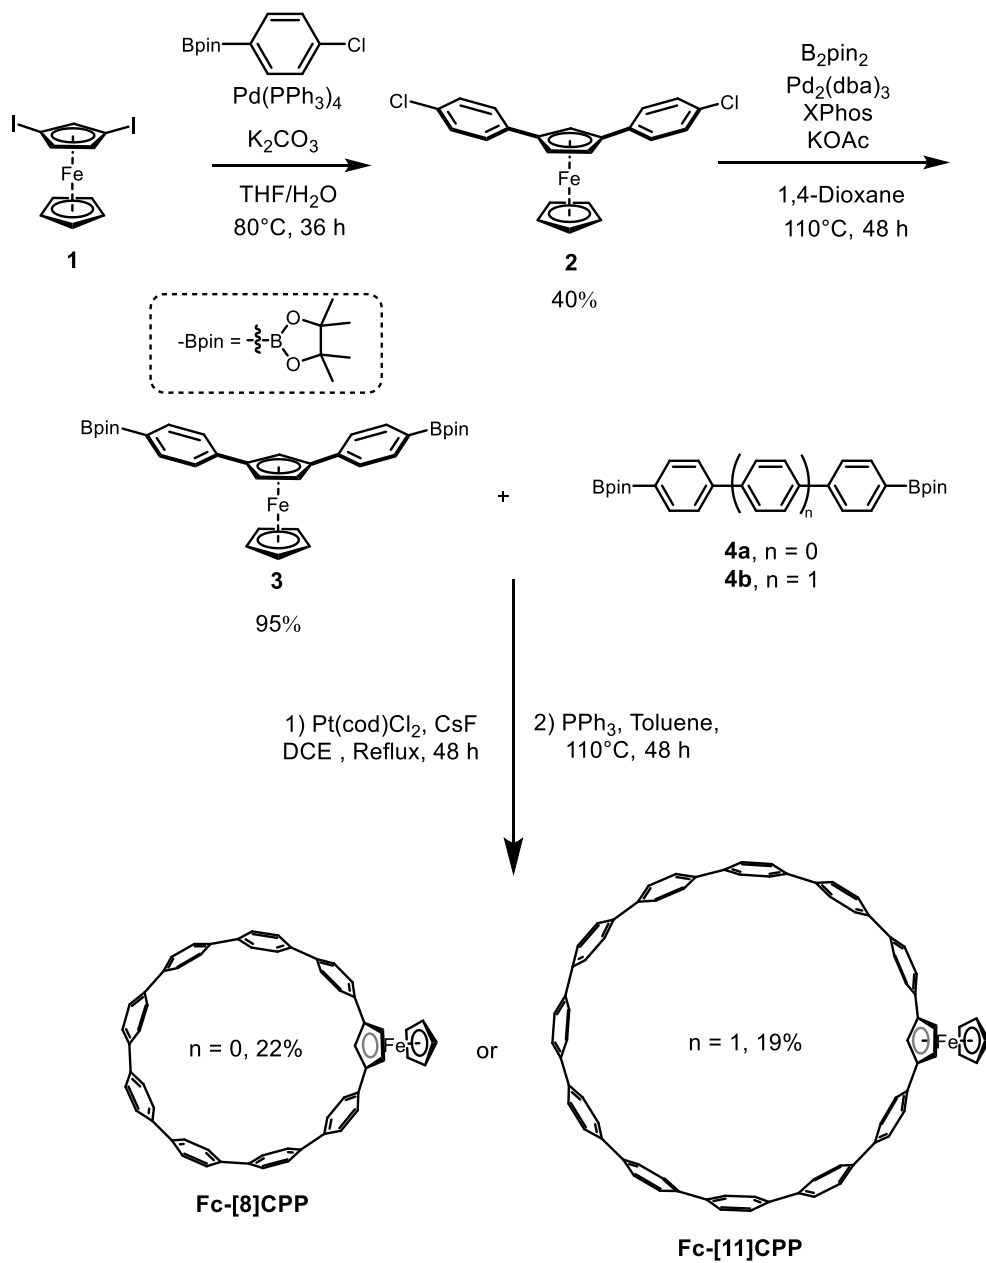

**Scheme S1.** The synthetic route of **Fc-[8]CPP** and **Fc-[11]CPP**.

## 2.1 Synthesis of 1,3-bis(4-chlorophenyl)ferrocene (**2**)

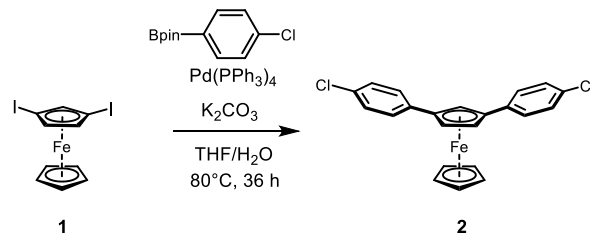

A mixture solution of 1,3-diiodoferrocene (3.50 g, 8.0 mmol, 1.0 equiv), 2-(4-chlorophenyl)-4,4,5,5-tetramethyl-1,3,2-dioxaborolane (7.63 g, 32.0 mmol, 4.0 equiv), K<sub>2</sub>CO<sub>3</sub> (11.06 g, 80.0 mmol, 10.0 equiv) in THF (180 mL) and H<sub>2</sub>O (60 mL) was degassed with Ar for 30 min. Then Pd(PPh<sub>3</sub>)<sub>4</sub> (0.93 g, 0.8 mmol, 0.1 equiv) was added and degassed with Ar for 5 min. After stirring at 80 °C for 36 h, the resulting mixture was cooled to room temperature, and concentrated under a vacuum. Then water (100 mL) was added and extracted with DCM (3 × 20 mL). The combined organic layers were dried over anhydrous Na<sub>2</sub>SO<sub>4</sub>, filtered, and concentrated under a vacuum. The crude residue was purified via column chromatography on silica gel (100% PE) to afford red solid (1.31 g, 40%). <sup>1</sup>H NMR (500 MHz, Chloroform-*d*) δ 7.47 – 7.43 (m, 4H), 7.30 – 7.26 (m, 4H), 5.08 (t, *J* = 1.5 Hz, 1H), 4.78 (d, *J* = 1.4 Hz, 2H), 3.92 (s, 5H). <sup>13</sup>C{<sup>1</sup>H} NMR (126 MHz, Chloroform-*d*) δ 137.5, 131.9, 128.7, 127.3, 85.4, 71.5, 67.6, 65.0. HRMS (ESI) *m/z* calculated for C<sub>22</sub>H<sub>16</sub>Cl<sub>2</sub>Fe [M]<sup>+</sup> 405.9973, Found: 405.9966.

## 2.2 Synthesis of 1,3-bis(4,4,5,5-tetramethyl-1,3,2-dioxaborolan-2-yl)ferrocene (**3**)

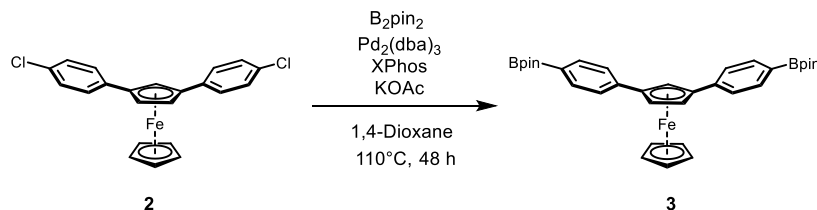

To 90 mL of dry 1,4-dioxane were added 1,3-bis(4-chlorophenyl)ferrocene **2** (1.83 g, 4.5 mmol, 1.0 equiv), bis(pinacolato)diboron (6.85 g, 27.0 mmol, 6.0 equiv), potassium acetate (2.65 g, 27.0 mmol, 6.0 equiv) and Pd<sub>2</sub>(dba)<sub>3</sub> (0.08 g, 0.09 mmol, 0.02 equiv), Xphos (0.13 g, 0.27 mmol, 0.06 equiv). The mixture was degassed with Ar for 30 min and heated to 110 °C for 48 h under the protection of nitrogen. After cooling to room temperature, 100 mL DCM was added, and then filtered with Celite. The filtrate was washed with water and brine. The combined organic layers were dried over anhydrous Na<sub>2</sub>SO<sub>4</sub>, filtered, and concentrated under a vacuum. The residue was dissolved with 30 mL DCM and 100 mL methanol, then concentrated under a vacuum until most of the solid precipitated. The precipitate was filtered and washed with methanol, then dried under vacuum to afford red solid (2.52 g, 95%). <sup>1</sup>H NMR (500 MHz, Chloroform-*d*) δ 7.76 (d, *J* = 7.7 Hz, 4H), 7.55 (d, *J* = 7.7 Hz, 4H), 5.24 (s, 1H), 4.87 (s, 2H), 3.89 (s, 5H), 1.37 (s, 24H). <sup>13</sup>C{<sup>1</sup>H} NMR (126 MHz, Chloroform-*d*) δ 142.3, 135.0, 125.4, 86.0, 83.9, 71.5, 67.9, 65.4, 25.0. HRMS (ESI) *m/z* calculated for C<sub>34</sub>H<sub>41</sub>B<sub>2</sub>FeO<sub>4</sub> [M+H]<sup>+</sup> 591.2535, Found: 591.2526.

## 2.3 Synthesis of **4b**

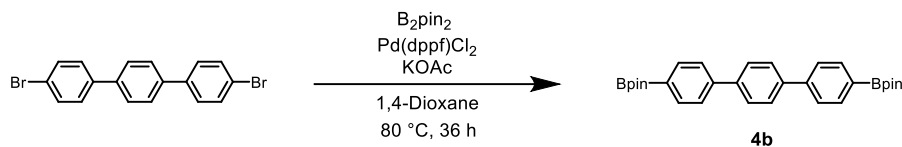

4,4'-Dibromodiphenyl ether (3.88 g, 10.0 mmol, 1.0 equiv.), bis(pinacolato)diboron (5.59 g, 22.0 mmol, 2.2 equiv.), KOAc (3.92 g, 40.0 mmol, 4.0 equiv.) and 80 mL of 1,4-dioxane were placed in a 250 mL Schlenk flask under an argon atmosphere and then Pd(dppf)Cl<sub>2</sub> (439.0 mg, 0.6 mmol, 0.06 equiv.) was added to the flask. The flask was evacuated and backfilled with argon three times and then refluxed for 36 h. The mixture was filtered through Celite (washed with chloroform) and the solvent was removed under vacuum affording the crude product as a brown solid. The crude product was washed with a small amount of DCM to give a pure product **4b** as a white solid (3.48 g, 80%). <sup>1</sup>H NMR (600 MHz, Chloroform-*d*) δ 7.90 (d, *J* = 8.3 Hz, 4H), 7.71 (s, 4H), 7.66 (d, *J* = 8.3 Hz, 4H), 1.37 (s, 24H). <sup>13</sup>C{<sup>1</sup>H} NMR (151 MHz, Chloroform-*d*) δ 143.4, 140.4, 135.5, 127.8, 126.5, 84.0, 25.0. HRMS (ESI) *m/z* calculated for C<sub>30</sub>H<sub>36</sub>B<sub>2</sub>O<sub>4</sub> [M]<sup>+</sup> 482.2794, Found: 482.2779.

## 2.4 Synthesis of Fc-[8]CPP

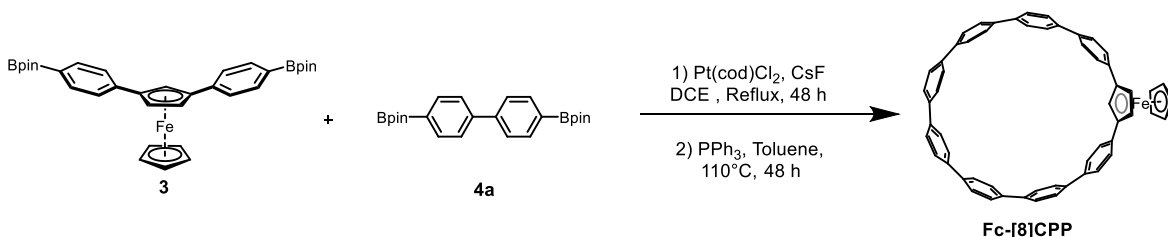

1,3-bis(4,4,5,5-tetramethyl-1,3,2-dioxaborolan-2-yl)ferrocene (**3**) (59.0 mg, 0.1 mmol, 1.0 equiv), 4,4'-bis(4,4,5,5-tetramethyl-1,3,2-dioxaborolan-2-yl)-1,1'-biphenyl (**4a**) (162.5 mg, 0.4 mmol, 4.0 equiv), Pt(cod)Cl<sub>2</sub> (187.1 mg, 0.5 mmol, 5.0 equiv) and CsF (455.7 mg, 3.0 mmol, 30.0 equiv) and DCE (80 mL) were placed in a 250 mL Schlenk flask then heated at 85 °C for 48 h. The most of solvent was removed under reduced pressure after the reaction was completed. After the addition of methanol (75 mL) to the residue, the precipitates were collected and washed further with methanol (50 mL). The crude material was dried under vacuum and then placed in a 100 mL Schlenk flask. Triphenylphosphine (1.31 g, 5.0 mmol, 50.0 equiv) and toluene (32 mL) were added to the flask. The inhomogeneous mixture was stirred at ambient temperature for 30 min, and then at 110 °C stirred for 48 h. The mixture was passed through column chromatography on silica gel (PE/DCM = 20%-50%) and the solvent was removed under reduced pressure. The crude product was purified by GPC to afford the product as a red solid (17.5 mg, 22%). <sup>1</sup>H NMR (600 MHz, Chloroform-*d*) δ 7.58 – 7.54 (m, 20H), 7.49 (d, *J* = 8.7 Hz, 4H), 7.41 (d, *J* = 8.6 Hz, 4H), 7.37 (d, *J* = 8.6 Hz, 4H), 4.51 (d, *J* = 1.5 Hz, 2H), 4.33 (s, 5H), 3.63 (t, *J* = 1.6 Hz, 1H). <sup>13</sup>C{<sup>1</sup>H} NMR (151 MHz, Chloroform-*d*) δ 138.8, 138.7, 138.3, 138.1, 138.0, 138.0, 128.7, 127.6, 127.6, 127.5, 127.5, 127.4, 127.0, 89.2, 80.3, 70.1, 63.9. HRMS (ESI) *m/z* calculated for C<sub>58</sub>H<sub>40</sub>Fe [M]<sup>+</sup> 792.2474, Found: 792.2471.

[8]CPP was also obtained as a yellow solid (5.8 mg, 1%), <sup>1</sup>H NMR (600 MHz, Chloroform-*d*) 7.48 (s, 32 H), this is in accordance with the results reported in the existing literature<sup>[S4]</sup>; **di-Fc-CPPs** and **tri-Fc-CPPs** could also be monitored by MALDI-TOF MS (See Figure S28), but can not be effectively separated due to low conversion rate.

## 2.5 Synthesis of **Fc-[11]CPP**

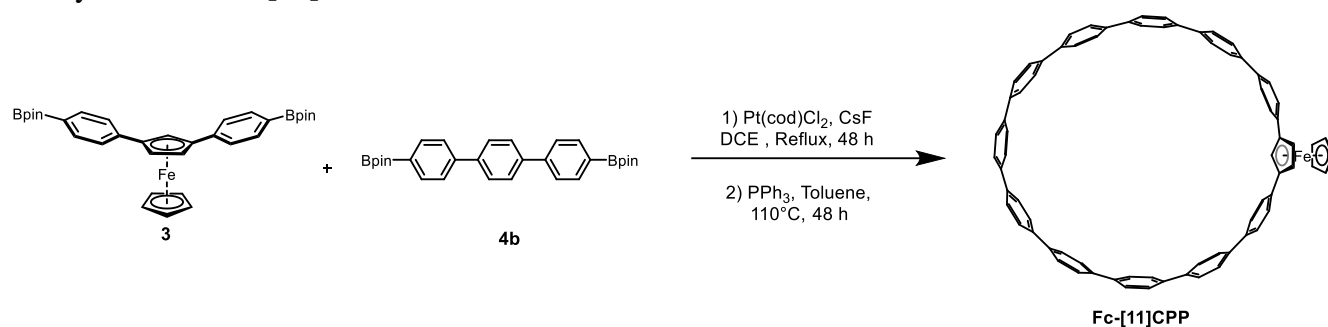

**Fc-[11]CPP** was prepared according to **Fc-[8]CPP** with **4b** (144.5 mg, 0.3 mmol, 3.0 equiv),  $\text{Pt}(\text{cod})\text{Cl}_2$  (149.7 mg, 0.4 mmol, 4.0 equiv) and CsF (364.5 mg, 2.4 mmol, 24.0 equiv). Purified by silica gel chromatography (PE/DCM=20%-50%) gave **Fc-[11]CPP** as an orange-red solid (19.5 mg, 19%).  $^1\text{H}$  NMR (600 MHz, Chloroform-*d*)  $\delta$  7.64 (q,  $J = 1.9$  Hz, 4H), 7.63 – 7.60 (m, 28H), 7.58 – 7.56 (m, 4H), 7.47 (s, 8H), 4.62 (d,  $J = 1.5$  Hz, 2H), 4.22 (s, 5H), 4.21 (t,  $J = 1.5$  Hz, 1H).  $^{13}\text{C}\{^1\text{H}\}$  NMR (151 MHz, Chloroform-*d*)  $\delta$  139.5, 138.8, 138.8, 138.7, 138.7, 138.7, 138.6, 138.6, 138.1, 128.2, 127.5, 127.5, 127.5, 127.4, 127.4, 127.1, 88.8, 76.5, 70.8, 64.8. HRMS (ESI)  $m/z$  calculated for  $\text{C}_{76}\text{H}_{52}\text{Fe}$   $[\text{M}]^+$  1020.3413, Found: 1020.3465.

[12]CPP was also obtained as a yellowish-white solid (8.9 mg, 1%),  $^1\text{H}$  NMR (600 MHz, Chloroform-*d*) 7.61 (s, 48 H), which is consistent with the results reported in the existing literature <sup>[S4]</sup>.

## 2.6 Synthesis of **Fc-[5]CPP**

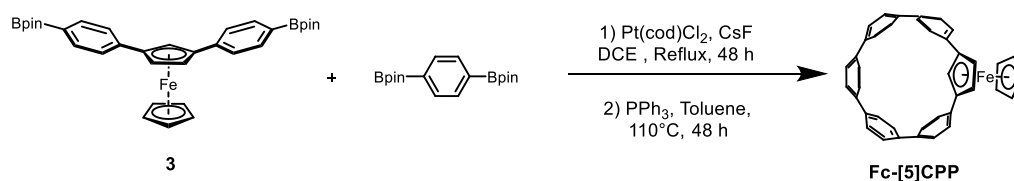

**Fc-[5]CPP** was prepared according to **Fc-[8]CPP** with 1,4-Benzenediboronic acid bis(pinacolate) ester (99.0 mg, 0.3 mmol, 3.0 equiv),  $\text{Pt}(\text{cod})\text{Cl}_2$  (149.7 mg, 0.4 mmol, 4.0 equiv) and CsF (364.5 mg, 2.4 mmol, 24 equiv), but it failed.

## 2.7 The optimization of the synthesis of **Fc-[8]CPP**

**Table S1.** The optimization of the synthesis of **Fc-[8]CPP**

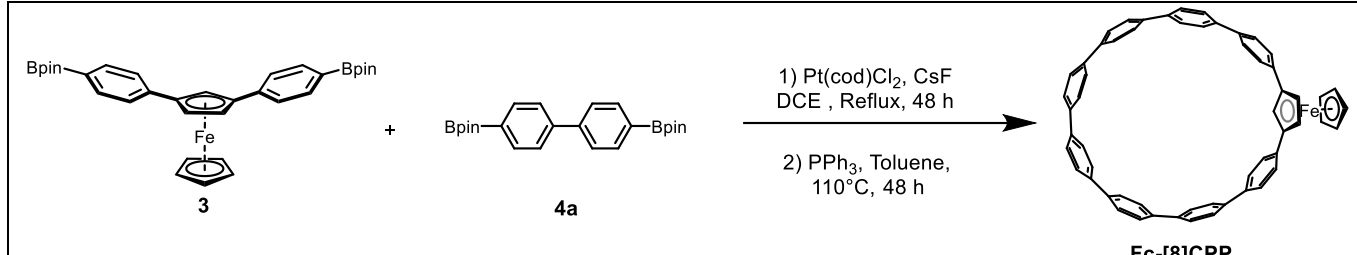

| Entries | <b>3:4a</b> | Cat.<br>(eq.) | Solvent<br>(Step 1) | Concentration<br>(mM) | Yield |
|---------|-------------|---------------|---------------------|-----------------------|-------|
| 1       | 1:3.0       | 4.2           | THF                 | 3.50                  | 0.4%  |
| 2       | 1:3.0       | 4.2           | DCE                 | 3.50                  | 9%    |
| 3       | 1:3.0       | 4.4           | DCE                 | 3.50                  | 5%    |
| 4       | 1:3.0       | 4.4           | DCE                 | 1.25                  | 11%   |
| 5       | 1:3.0       | 4.4           | DCE                 | 1.00                  | 10%   |
| 6       | 1:3.0       | 4.1           | DCE                 | 1.25                  | 15%   |
| 7       | 1:3.0       | 4.0           | DCE                 | 1.25                  | 16%   |
| 8       | 1:2.5       | 3.5           | DCE                 | 1.25                  | 0.4%  |
| 9       | 1:2.5       | 4.0           | DCE                 | 1.25                  | 7%    |
| 10      | 1:3.5       | 4.5           | DCE                 | 1.25                  | 14%   |
| 11      | 1:4.0       | 5.0           | DCE                 | 1.25                  | 22%   |
| 12      | 1:4.5       | 5.5           | DCE                 | 1.25                  | 16%   |



### 3. X-Ray Crystallography

**Table S2.** Crystal data and structure refinement for **Fc-[8]CPP**

| Sample                                               | Fc-[8]CPP                                                                    |
|------------------------------------------------------|------------------------------------------------------------------------------|
| CCDC number                                          | 2313391                                                                      |
| Empirical formula                                    | C <sub>58</sub> H <sub>40</sub> Fe                                           |
| Formula weight                                       | 792.75                                                                       |
| Temperature/K                                        | 121(30)                                                                      |
| Crystal system                                       | monoclinic                                                                   |
| Space group                                          | <i>P</i> 2 <sub>1</sub> / <i>n</i>                                           |
| <i>a</i> /Å                                          | 20.2138(7)                                                                   |
| <i>b</i> /Å                                          | 12.8399(6)                                                                   |
| <i>c</i> /Å                                          | 20.5547(11)                                                                  |
| $\alpha$ /°                                          | 90                                                                           |
| $\beta$ /°                                           | 93.970(4)                                                                    |
| $\gamma$ /°                                          | 90                                                                           |
| Volume/Å <sup>3</sup>                                | 5322.0(4)                                                                    |
| <i>Z</i>                                             | 4                                                                            |
| <i>F</i> (000)                                       | 1656.0                                                                       |
| Reflections collected                                | 30687                                                                        |
| Independent reflections                              | 9539 [ <i>R</i> <sub>int</sub> = 0.0640, <i>R</i> <sub>sigma</sub> = 0.0593] |
| Data/restraints/parameters                           | 9539/0/532                                                                   |
| Goodness-of-fit on <i>F</i> <sup>2</sup>             | 1.078                                                                        |
| Final <i>R</i> indexes [ <i>I</i> ≥ 2σ ( <i>I</i> )] | <i>R</i> <sub>1</sub> = 0.0685, <i>wR</i> <sub>2</sub> = 0.1872              |
| Final <i>R</i> indexes [all data]                    | <i>R</i> <sub>1</sub> = 0.0938, <i>wR</i> <sub>2</sub> = 0.2039              |

The weak intermolecular interaction

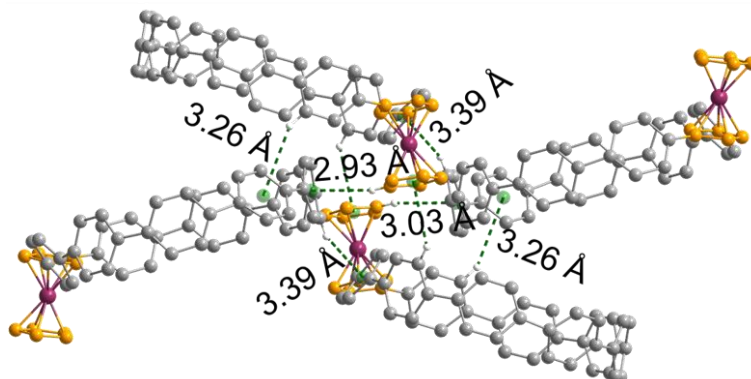

Figure S1. The C-H... $\pi$  interactions in **Fc-[8]CPP**.

Table S3 Four kinds of C-H... $\pi$  interactions in the packing model of **Fc-[8]CPP**

| $d_{\text{C-H}\cdots\pi}$ ( $\angle\text{C-H}\cdots\pi$ ) | $\pi$ (Cp)      | $\pi$ (Ph)                         |
|-----------------------------------------------------------|-----------------|------------------------------------|
| C-H (Cp)                                                  | -               | 2.93 Å (167.4°)                    |
| C-H (Ph)                                                  | 3.03 Å (141.7°) | 3.26 Å (151.9°)<br>3.39 Å (152.9°) |

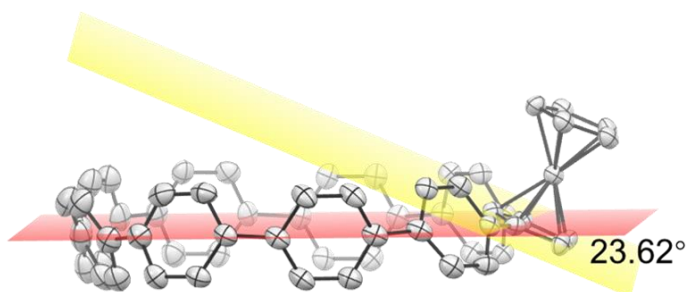

Figure S2. The angle between the plane of Cp and the plane of CPP in **Fc-[8]CPP**.



#### 4. Density Functional Theory (DFT) Computational Details

The geometry optimizations and frontier molecular orbital were performed by the Gaussian 16 package<sup>[S5]</sup> at the B3LYP-D3(BJ)/6-31G(d) (C, H) and SDD (Fe) level of theory.<sup>[S6]</sup> The geometry optimizations, frontier molecular orbital and strain energies of **Fc-[*n*]CPP** ( $n = 5-12$ ) were calculated at B3LYP/6-31G(d) (C, H, Fe) level of theory for comparison with [*n*]CPP and *m*[*n*]CPP. In the calculations of the rotation process, geometry optimizations were performed by the Gaussian 16 package at the PBE0-D3(BJ)/6-31G(d,p) level of theory. Specifically, iron atoms in the system were treated with the SDD basis set and pseudopotential. Intrinsic reaction coordinate (IRC) calculations were used to ensure that each transition state connected the correct two minima. Highly accurate electronic energies were computed by ORCA 5.0.4 package<sup>[S7]</sup> at the RI- $\omega$ B97M-V/Def2-TZVP level of theory.<sup>[S8]</sup> Def2/J auxiliary basis sets were used for the RI-J approximation.<sup>[S9]</sup> Solvation effects were included using the solvation model based on density (SMD) with a standard state of 1 M.<sup>[S10]</sup> Grimme' s quasiharmonic correction and harmonic vibrational frequency scale factors for the PBE0/6-31G(d,p) level of theory were applied by using the Shermo 2.4 package.<sup>[S11]</sup> Optimized structures were illustrated using CYLview.<sup>[S12]</sup> Vibrational frequency calculations were carried out at the same level to confirm whether the structure is a minimum (no imaginary frequency) or a transition state (only one imaginary frequency). Spin densities were drawn by combining Multiwfn 3.8<sup>[S13]</sup> and VMD<sup>[S14]</sup>. The strain energies were calculated based on the homodesmotic reaction schemes.<sup>[S15]</sup>

#### 4.1 TD-DFT calculation

The measured and calculated UV-Vis absorption spectra at different functional theory, basis set was 6-31G(d) for C, H; SDD for Fe.

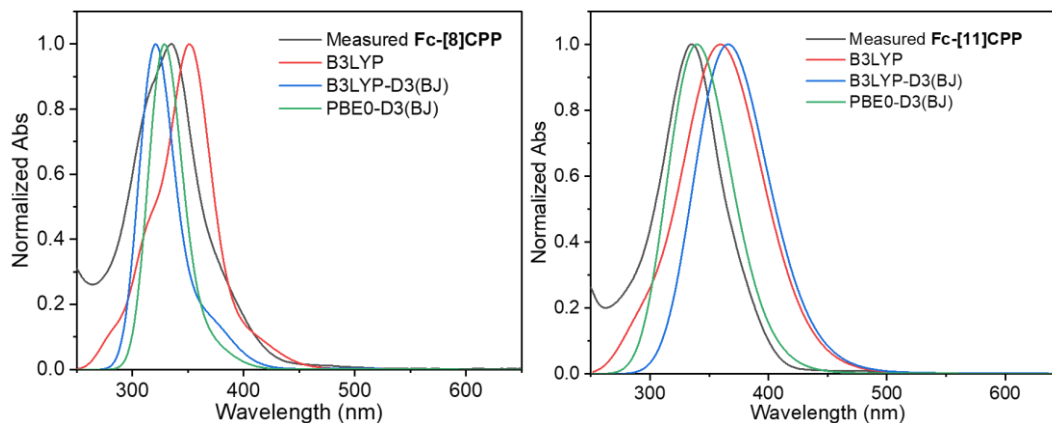

**Figure S3.** The measured and calculated UV-Vis absorption spectra.

**Table S4.** Major electronic transitions for **Fc-[8]CPP** by TD-DFT calculated at the B3LYP/6-31G(d) (C, H) and SDD (Fe) level of theory.

| Excited states | Energy (eV) | Excitation [nm] | Oscillator strength (f) | Contribution                                                                          |
|----------------|-------------|-----------------|-------------------------|---------------------------------------------------------------------------------------|
| S1             | 2.4188      | 512.59          | 0.00050                 | H-1 → L+12 12.7%, H-2 → L+13 10.6%, H-3 → L+13 9.5%, H-2 → L+3 8.7%, H-2 → L+12 5.6%  |
| S2             | 2.4249      | 511.30          | 0.00500                 | H-2 → L+12 12.6%, H-1 → L+13 11.1%, H-3 → L+12 10.8%, H-1 → L+3 7.4%, H-2 → L+13 5.3% |
| S3             | 2.8092      | 441.35          | 0.00060                 | H-6 → L+13 13.5%, H-1 → L+12 10.4%, H-6 → L+3 8.4%, H-2 → L+13 5.5%                   |
| S4             | 2.8608      | 433.39          | 0.00160                 | H-6 → L+12 20.8%, H-2 → L+12 10.3%, H-3 → L+12 8.0%                                   |
| S5             | 3.0600      | 405.18          | 0.21020                 | H → L 93.4%                                                                           |
| S6             | 3.5004      | 354.20          | 1.26680                 | H-1 → L 61.0%, H → L+1 31.3%                                                          |
| S7             | 3.5198      | 352.25          | 0.71600                 | H → L+1 41.1%, H-1 → L 28.9%, H-2 → L 22.9%                                           |
| S8             | 3.5380      | 350.44          | 0.02940                 | H-2 → L 69.3%, H → L+1 20.9%                                                          |
| S9             | 3.6356      | 341.03          | 0.11630                 | H-3 → L 59.0%, H-2 → L+1 9.1%                                                         |
| S10            | 3.6577      | 338.97          | 0.03500                 | H-3 → L 28.0%, H-2 → L+1 7.6%, H-1 → L+1 6.3%, H-1 → L+12 5.4%                        |

**Table S5.** Major electronic transitions for **Fc-[11]CPP** by TD-DFT calculated at the B3LYP/6-31G(d) for C, H, SDD for Fe.

| Excited states | Energy (eV) | Excitation [nm] | Oscillator strength (f) | Contribution                                                                                    |
|----------------|-------------|-----------------|-------------------------|-------------------------------------------------------------------------------------------------|
| S1             | 2.0578      | 602.51          | 0.00120                 | H-1 → L+5 15.3%, H → L+14 12.8%, H-1 → L+20 11.6%,<br>H-2 → L+14 11.3%                          |
| S2             | 2.0637      | 600.79          | 0.00510                 | H-1 → L+14 23.9%, H-3 → L+14 8.3%, H → L+5 7.9%, H-<br>2 → L+5 7.2%, H → L+20 6.0%              |
| S3             | 2.5126      | 493.45          | 0.00450                 | H-7 → L+5 15.0%, H-7 → L+20 12.7%, H → L+14 11.8%,<br>H-2 → L+14 10.2%                          |
| S4             | 2.5735      | 481.77          | 0.00120                 | H-7 → L+14 33.5%, H-1 → L+14 22.3%, H-3 → L+14<br>9.9%                                          |
| S5             | 3.1396      | 394.90          | 0.01670                 | H → L 71.8%, H-2 → L 10.8%                                                                      |
| S6             | 3.3491      | 370.20          | 0.35280                 | H-2 → L 26.8%, H-7 → L+5 9.6%, H-7 → L+20 6.8%, H-1<br>→ L+1 6.8%, H → L+2 6.0%, H-7 → L+3 5.8% |
| S7             | 3.3602      | 368.98          | 2.12310                 | H → L+1 66.0%, H-1 → L 11.0%, H-3 → L 10.7%                                                     |
| S8             | 3.3952      | 365.17          | 0.49410                 | H-2 → L 44.2%, H → L 9.5%, H-1 → L+1 8.8%, H → L+2<br>6.4%                                      |
| S9             | 3.3995      | 364.71          | 0.26630                 | H-1 → L 53.3%, H-7 → L+14 14.6%, H-1 → L+2 8.9%, H-2<br>→ L+1 5.1%                              |
| S10            | 3.5238      | 351.85          | 0.19510                 | H-1 → L 23.2%, H-7 → L+14 19.5%, H-2 → L+1 16.1%, H-<br>1 → L+14 10.9%, H-3 → L 5.9%            |

## 4.2 Strain energy calculation

The strain energy of **Fc-[n]CPP** calculated at the B3LYP/6-31G(d) level of theory

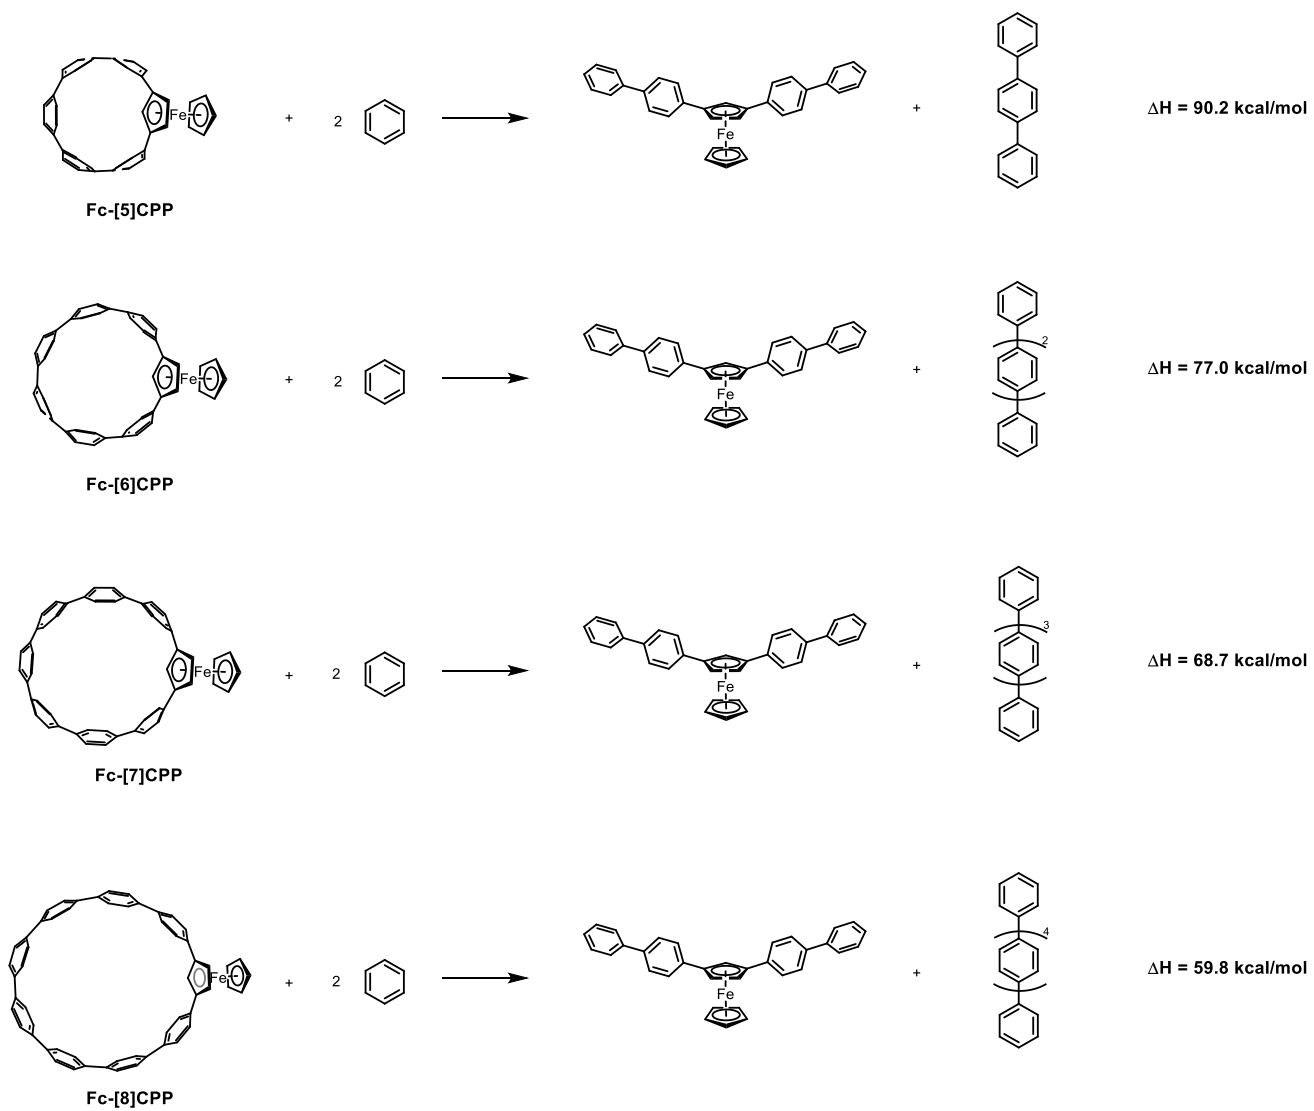



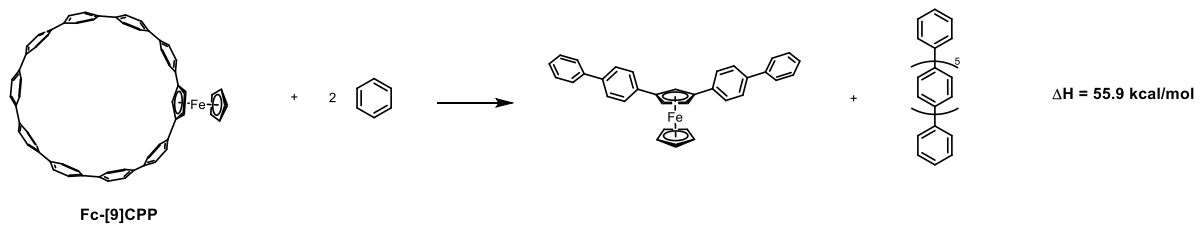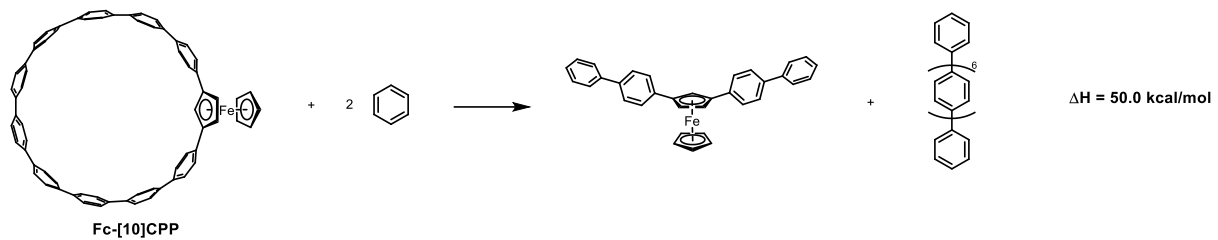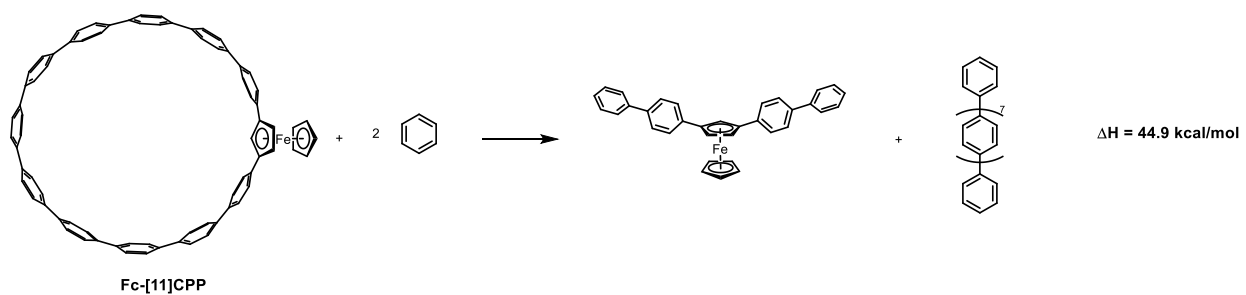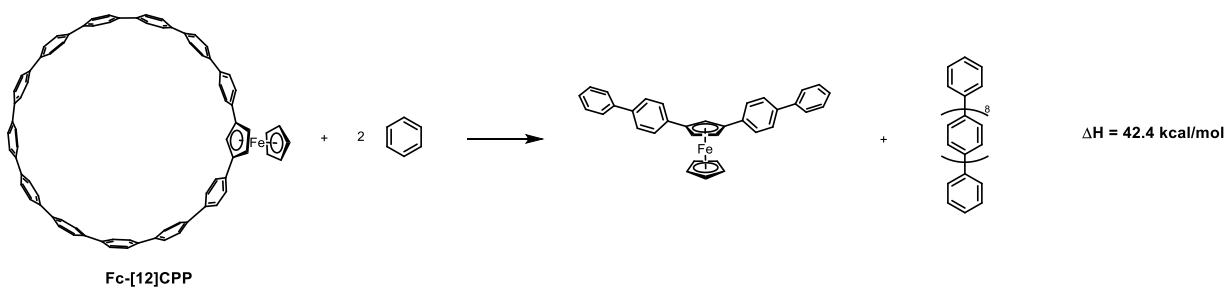

Strain energy of  $m[n]$ CPP calculated at the B3LYP/6-31G(d) level of theory

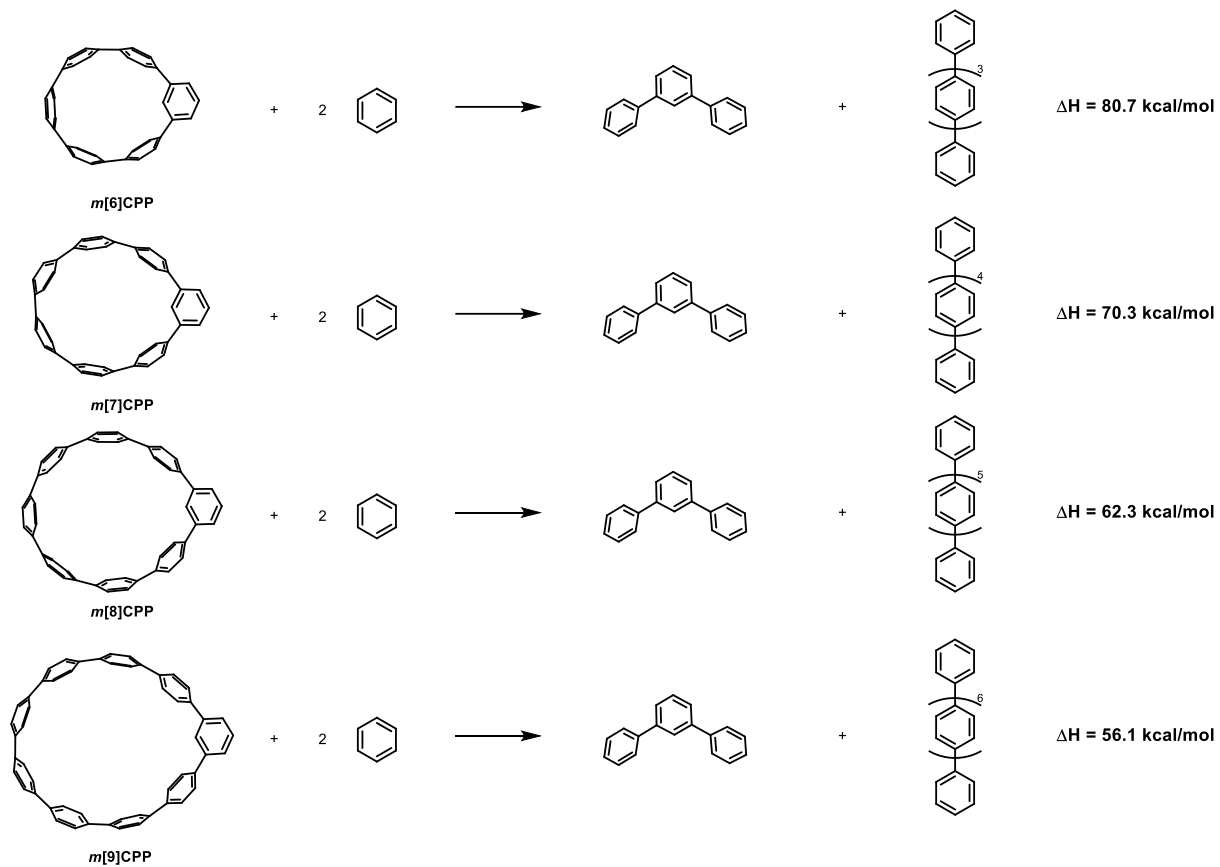

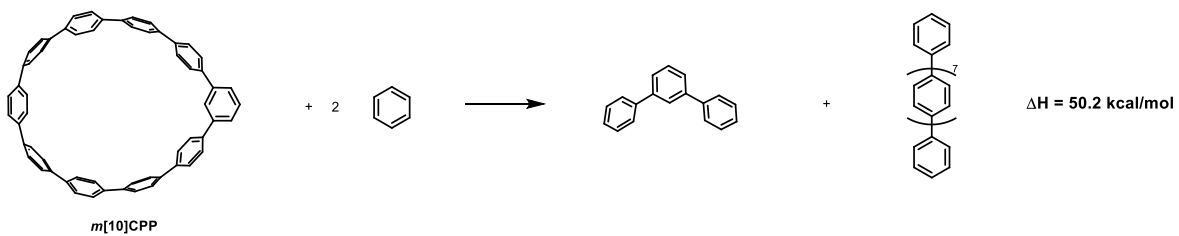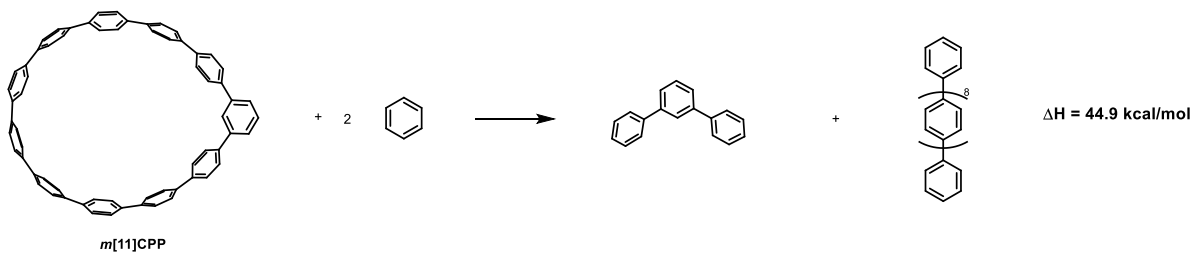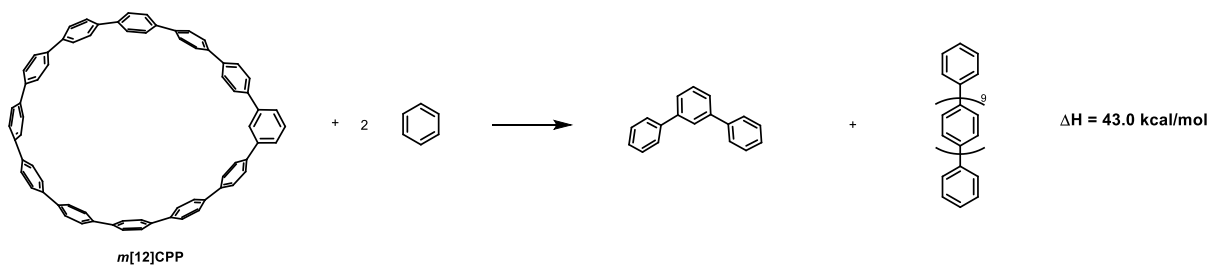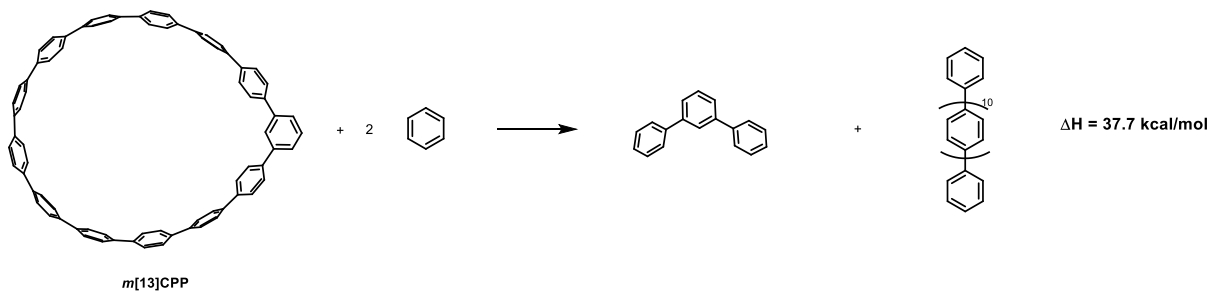

**Table S6.** HOMO, LUMO energy and strain energy of **Fc-[*n*]CPP**, [*n*]CPP,<sup>[S16, S17]</sup> and *m*[*n*]CPP calculated at the B3LYP/6-31G(d) level of theory.

| Compound          | HOMO (eV) | LUMO (eV) | Energy gap (eV) | Strain energy (kcal/mol) |
|-------------------|-----------|-----------|-----------------|--------------------------|
| [6]CPP            | -4.92     | -1.78     | 3.14            | 96.0                     |
| [7]CPP            | -4.97     | -1.80     | 3.17            | 84.0                     |
| [8]CPP            | -5.11     | -1.70     | 3.41            | 72.2                     |
| [9]CPP            | -5.13     | -1.72     | 3.41            | 65.6                     |
| [10]CPP           | -5.20     | -1.67     | 3.53            | 57.7                     |
| [11]CPP           | -5.21     | -1.68     | 3.53            | 53.7                     |
| [12]CPP           | -5.26     | -1.63     | 3.63            | 48.1                     |
| [13]CPP           | -5.26     | -1.65     | 3.61            | 45.5                     |
| <i>m</i> [6]CPP   | -5.09     | -1.58     | 3.51            | 80.7                     |
| <i>m</i> [7]CPP   | -5.07     | -1.67     | 3.40            | 70.3                     |
| <i>m</i> [8]CPP   | -5.14     | -1.65     | 3.49            | 62.3                     |
| <i>m</i> [9]CPP   | -5.15     | -1.67     | 3.48            | 56.1                     |
| <i>m</i> [10]CPP  | -5.18     | -1.66     | 3.50            | 50.2                     |
| <i>m</i> [11]CPP  | -5.24     | -1.62     | 3.62            | 44.9                     |
| <i>m</i> [12]CPP  | -5.23     | -1.65     | 3.58            | 43.0                     |
| <i>m</i> [13]CPP  | -5.27     | -1.62     | 3.65            | 37.7                     |
| <b>Fc-[5]CPP</b>  | -4.93     | -1.60     | 3.33            | 90.2                     |
| <b>Fc-[6]CPP</b>  | -4.90     | -1.66     | 3.30            | 77.0                     |
| <b>Fc-[7]CPP</b>  | -5.00     | -1.69     | 3.11            | 68.7                     |
| <b>Fc-[8]CPP</b>  | -5.09     | -1.63     | 3.46            | 59.8                     |
| <b>Fc-[9]CPP</b>  | -5.08     | -1.65     | 3.43            | 55.9                     |
| <b>Fc-[10]CPP</b> | -5.14     | -1.59     | 3.55            | 50.0                     |
| <b>Fc-[11]CPP</b> | -5.12     | -1.62     | 3.50            | 44.9                     |
| <b>Fc-[12]CPP</b> | -5.15     | -1.62     | 3.54            | 42.4                     |

The HOMO and LUMO data of [*n*]CPP were taken from ref S4; the strain energy data of [*n*]CPP were taken from ref S16.

#### 4.3 Relative energy in the rotation process of **Fc-[8]CPP**

**Table S7.** Relative energy in the rotation process of **Fc-[8]CPP**

| Conformation | Energy (Hartree) | Relative energy (Hartree) | Relative energy (kal/mol) |
|--------------|------------------|---------------------------|---------------------------|
| <b>A</b>     | -3497.2494931    | 0.0000000                 | 0                         |
| <b>B</b>     | -3497.242339     | 0.0071545                 | 4.4895167                 |
| <b>TS-1</b>  | -3497.246698     | 0.0027949                 | 1.7538263                 |
| <b>TS-2</b>  | -3497.197146     | 0.0523467                 | 32.848052                 |

#### 4.4 Oxidation state optimization of **Fc-CPPs**

Comparison between the ground station and oxidation state of **Fc-[8]CPP**

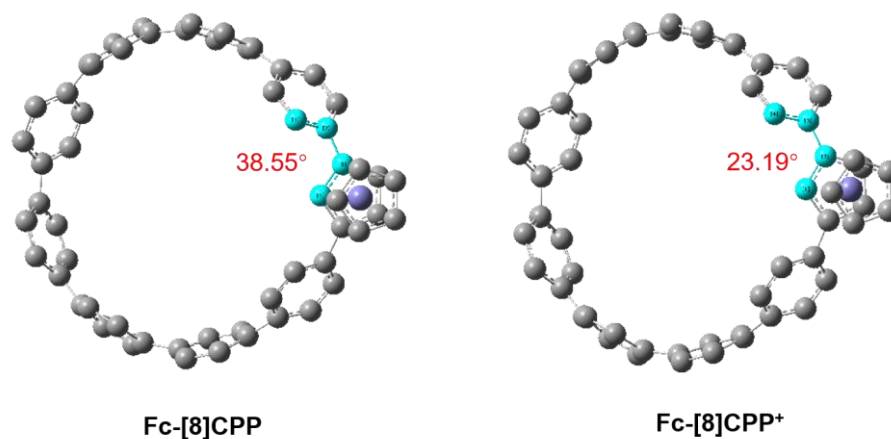

**Figure S4.** The geometry optimizations of ground station and oxidation state of **Fc-[8]CPP**

As shown in Figure S4, the oxidation of **Fc-[8]CPP** (named **Fc-[8]CPP<sup>+</sup>**) has smaller torsion angel between Fc and adjacent benzene units, which means the conformation of **Fc-[8]CPP** could be adjusted by oxidation.

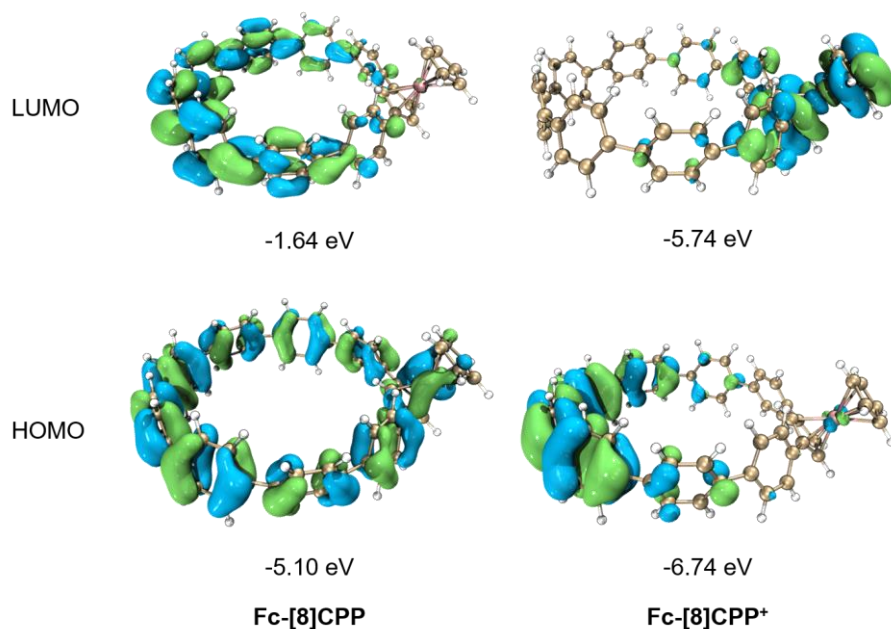

**Figure S5.** The frontier molecular orbit of the ground station and oxidation state of **Fc-[8]CPP**

As shown in Figure S5, after oxidation, the electron density had obvious separation, the electron was mainly delocalized at the CPP part at HOMO, and the electron was mainly delocalized at the Fc<sup>+</sup> part at LUMO. The oxidation state of **Fc-[11]CPP** (named **Fc-[11]CPP<sup>+</sup>**) was similar, see below.

Comparison between the ground station and oxidation state of **Fc-[11]CPP**

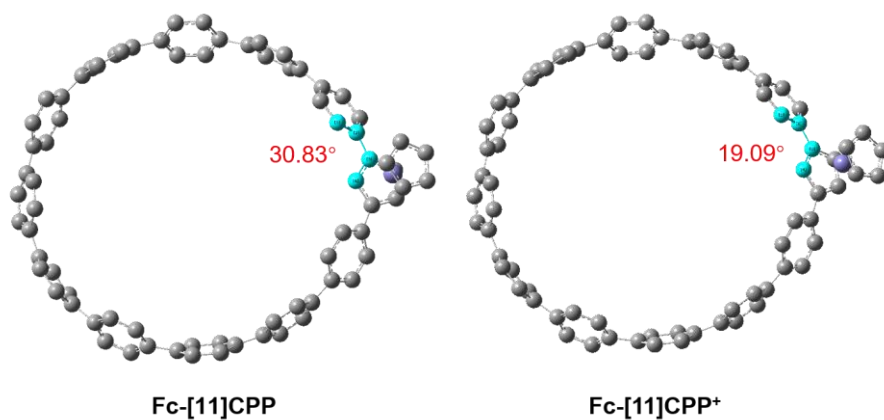

**Figure S6.** The geometry optimizations of the ground station and oxidation state of **Fc-[11]CPP**

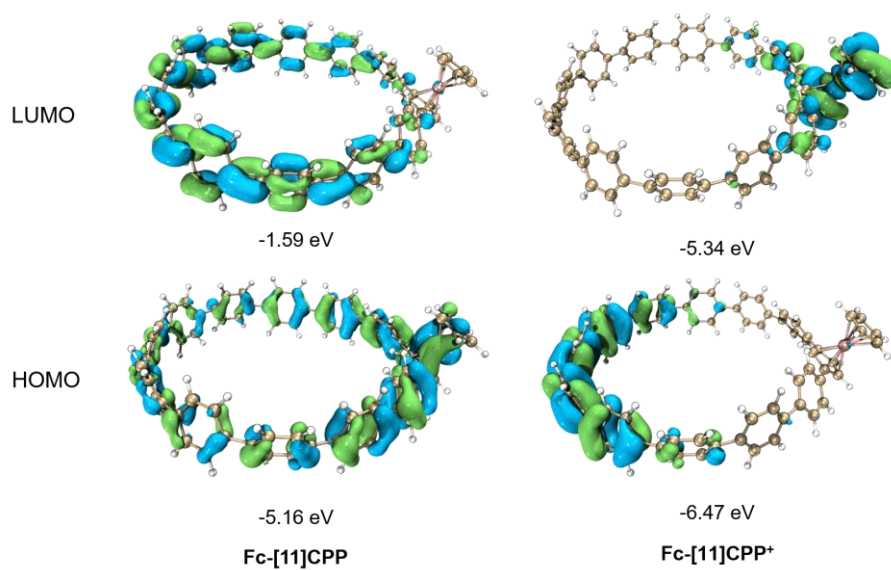

**Figure S7.** The frontier molecular orbitals of the ground station and oxidation state of **Fc-[11]CPP**

## 5. Variable temperature NMR (VT-NMR) of Fc-[8]CPP

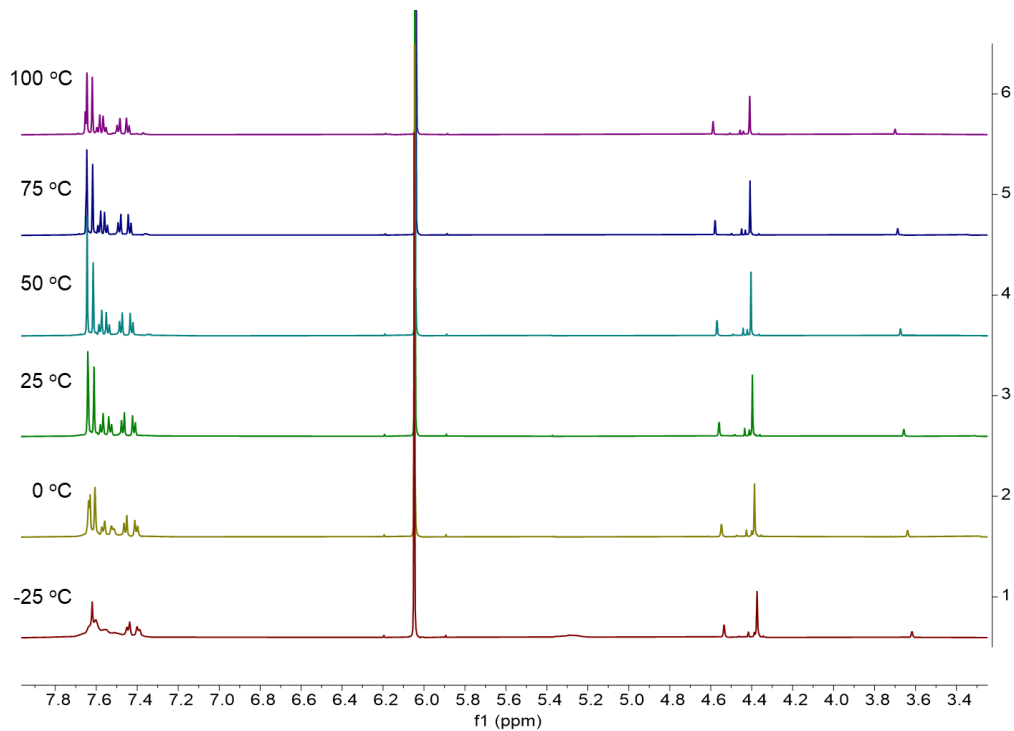

Figure S8 VT-NMR of Fc-[8]CPP in 1,1,2,2-tetrachloroethane-*d*<sub>2</sub> (600 MHz)

## 6. Redox property of Fc-[8]CPP

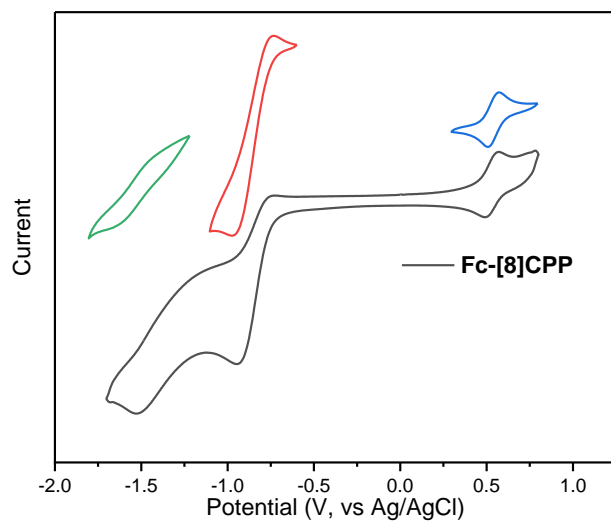

Figure S9. The CV curves of Fc-[8]CPP in CH<sub>2</sub>Cl<sub>2</sub> solution (0.1 mM) containing 0.1 M *n*-Bu<sub>4</sub>NPF<sub>6</sub> at room temperature, scan rate: 100 mV/s.

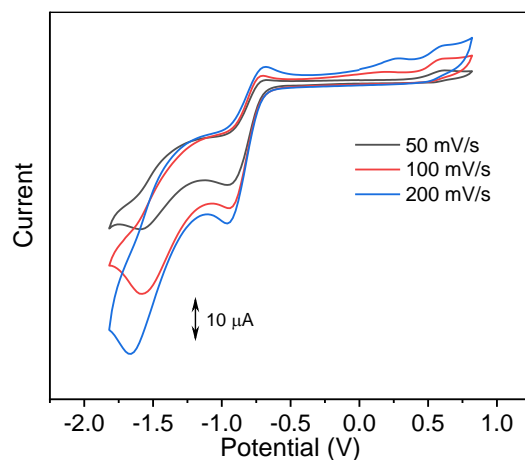

**Figure S10.** The CV curves of **Fc-[8]CPP** in  $\text{CH}_2\text{Cl}_2$  solution (0.1 mM) containing 0.1 M  $n\text{-Bu}_4\text{NPF}_6$  at room temperature at different scan rates.

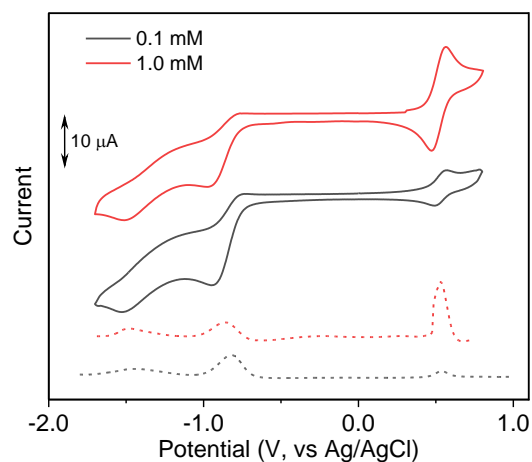

**Figure S11.** The CV (solid) and DPV (dashed) curves of **Fc-[8]CPP** in  $\text{CH}_2\text{Cl}_2$  solution containing 0.1 M  $n\text{-Bu}_4\text{NPF}_6$  at room temperature at different concentrations.

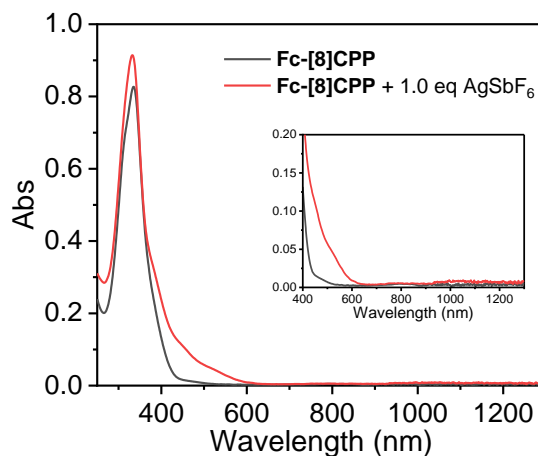

**Figure S12.** The UV-Vis-NIR absorption of **Fc-[8]CPP** ( $1.0 \times 10^{-5}$  M) in the presence of  $\text{AgSbF}_6$  in  $\text{CH}_2\text{Cl}_2$  solution.



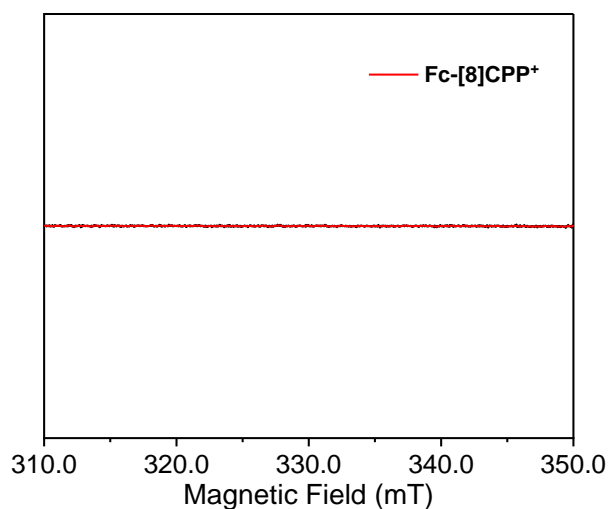

**Figure S13.** The EPR spectra of **Fc-[8]CPP<sup>+</sup>** ( $1.0 \times 10^{-3}$  M) in the presence of  $\text{AgSbF}_6$  in  $\text{CH}_2\text{Cl}_2$  solution.

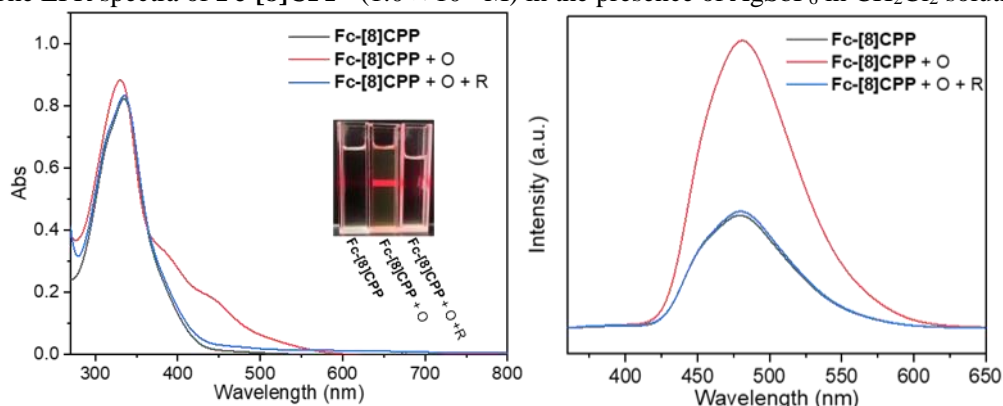

**Figure S14.** UV-Vis (left) and fluorescence (right) spectra curves of **Fc-[8]CPP** ( $1.0 \times 10^{-5}$  M) in the presence of oxidation (O, 1.0 eq  $\text{AgSbF}_6$ ) and reductant (R, excess  $\text{Et}_3\text{N}$ ) in  $\text{CH}_2\text{Cl}_2$  solution,  $\lambda_{\text{ex}} = 340$  nm. (Inset) images of **Fc-[8]CPP** (left) in the presence of oxidation (middle) and excess reductant (right) under red laser irradiation.

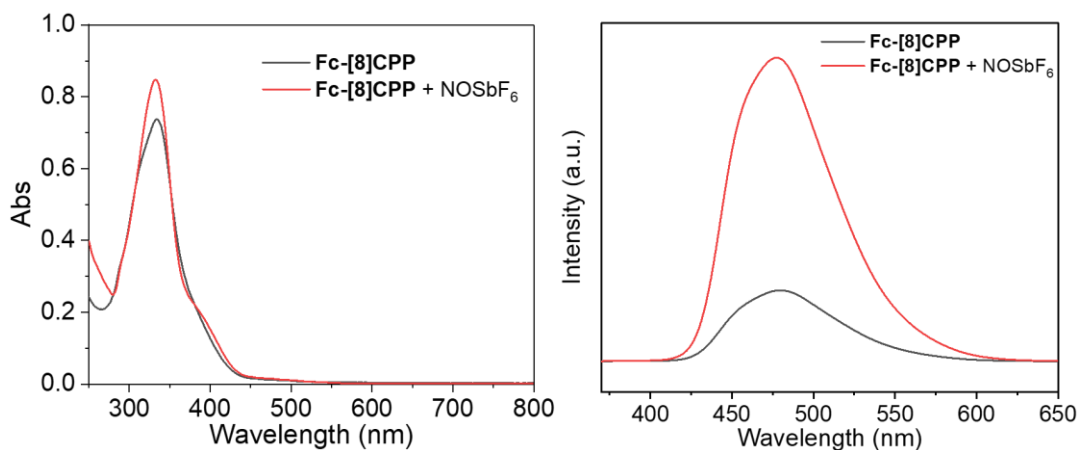

**Figure S15.** UV-Vis (left) and fluorescence (right) spectra curves of **Fc-[8]CPP** ( $1.0 \times 10^{-5}$  M) in the presence of oxidation (O, 1.0 eq  $\text{NOSbF}_6$ ) in THF solution,  $\lambda_{\text{ex}} = 340$  nm.

## 7. Oxidation titration of Fc-[11]CPP

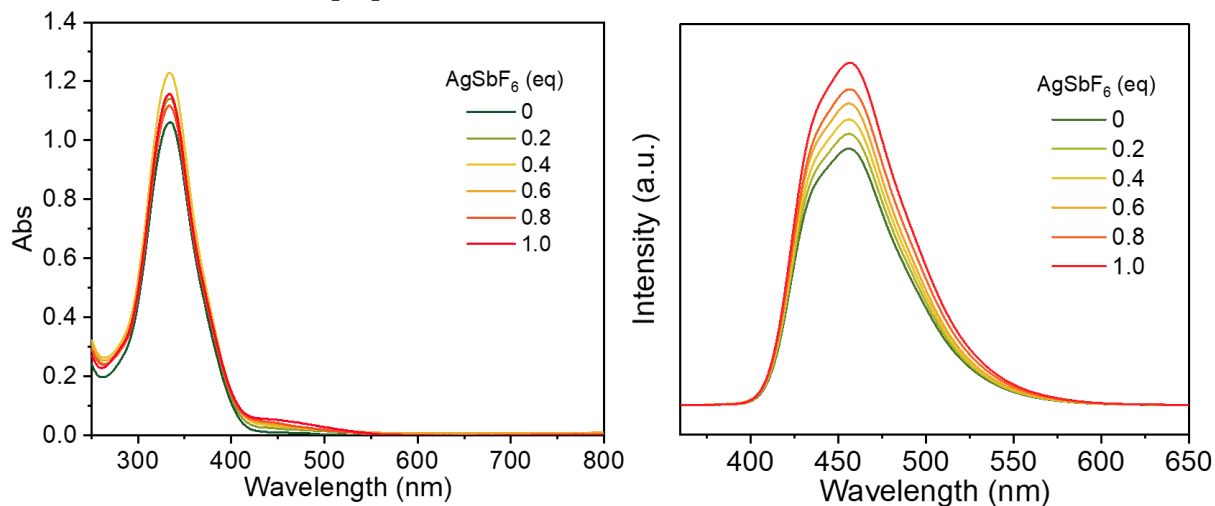

**Figure S16.** UV-Vis (left) and fluorescence (right) spectra curves of **Fc-[11]CPP** ( $1.0 \times 10^{-5}$  M) in the presence of  $\text{AgSbF}_6$ ,  $\lambda_{\text{ex}} = 340$  nm.

## 8. UV-Vis spectra titration of fullerenes to Fc-CPPs

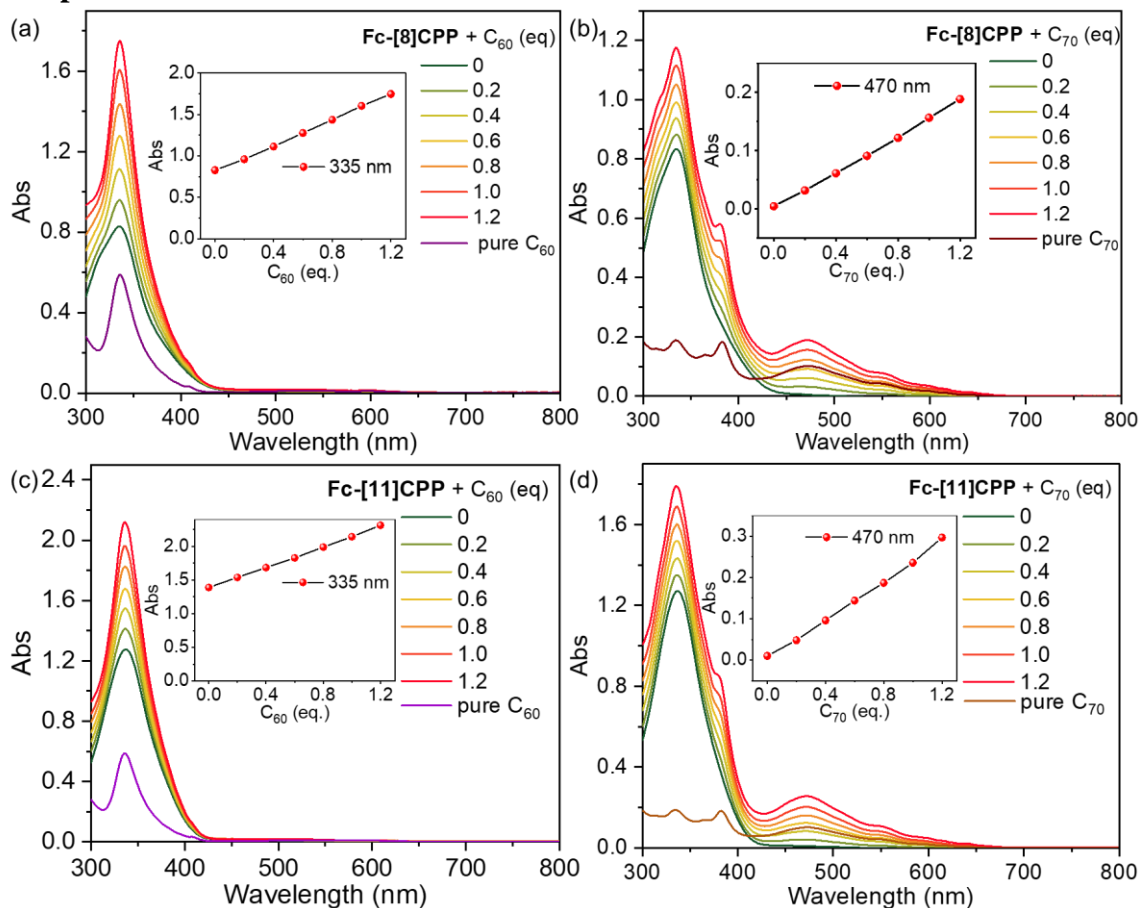

**Figure S17.** UV-Vis spectra of **Fc-[8]CPP** (a, b) and **Fc-[11]CPP** (c, d) in the presence of C<sub>60</sub> (a, c) and C<sub>70</sub> (b, d) in toluene solution, concentration:  $1.0 \times 10^{-5}$  M. Inset: the plot of absorption of **Fc-CPPs** with the addition of C<sub>60</sub> (at 335 nm) and C<sub>70</sub> (at 470 nm).

## 9. $K_{SV}$ curve in titration process of Fc-CPPs with fullerenes

The Stern-Volmer equation:  $F_0/F = 1 + K_{SV}[Q]$

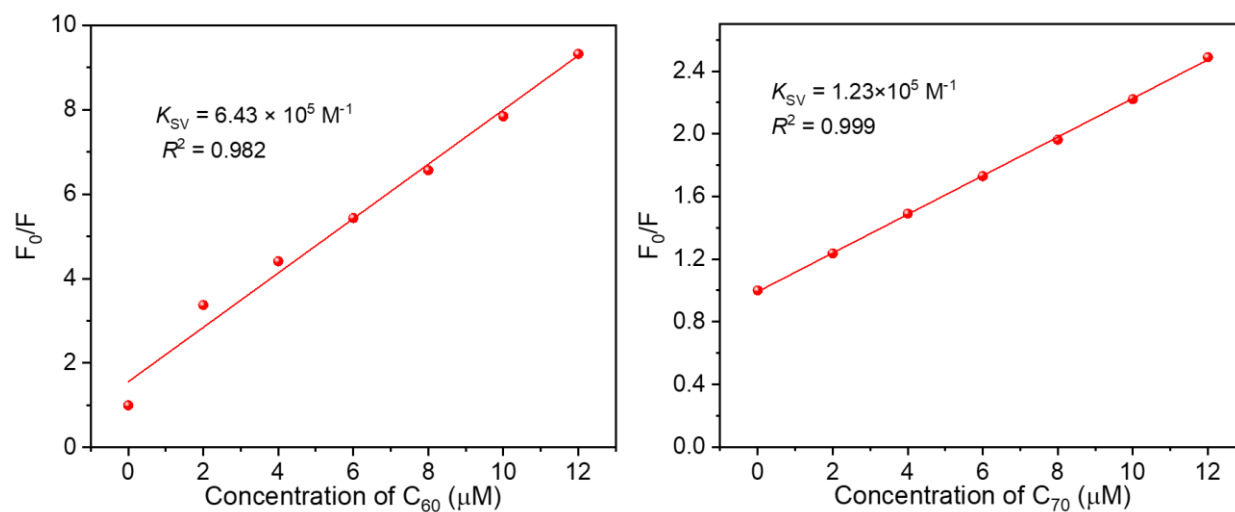

**Figure S18.** Correlation of concentration of C<sub>60</sub> (left) and C<sub>70</sub> (right) on the fluorescent intensity of Fc-[8]CPP in toluene ( $1.0 \times 10^{-5}$  M) for obtaining the  $K_{sv}$ .  $R^2$  is the standard deviation.

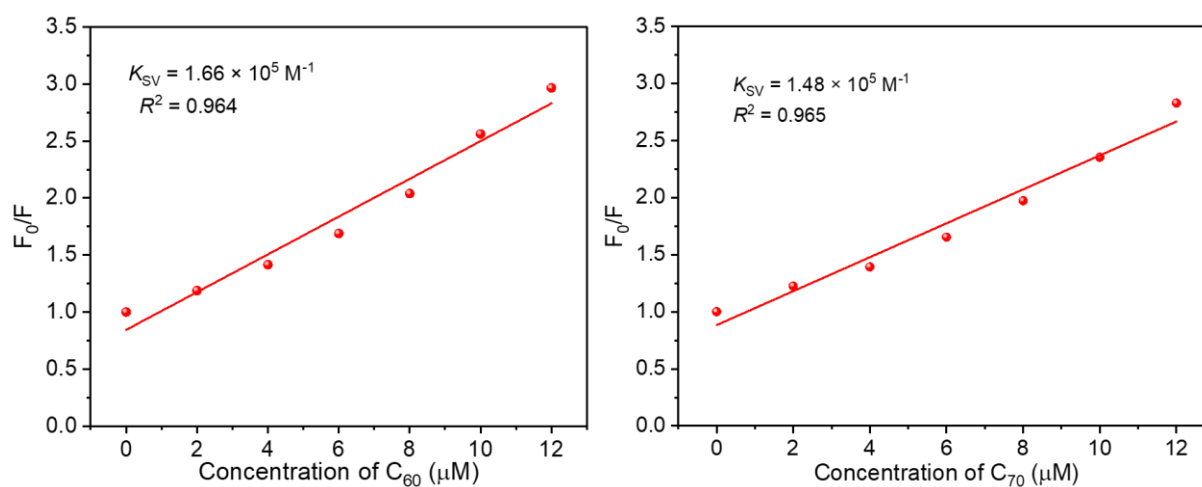

**Figure S19.** Correlation of concentration of C<sub>60</sub> (left) and C<sub>70</sub> (right) on the fluorescent intensity of Fc-[11]CPP in toluene ( $1.0 \times 10^{-5}$  M) for obtaining the  $K_{sv}$ .  $R^2$  is the standard deviation.

## 10. Cartesian coordinates of optimized structures

The geometry optimizations were calculated at the B3LYP/6-31G(d) level of theory unless otherwise specified.

| Fc-[5]CPP |          |          |          |    |          |          |          |
|-----------|----------|----------|----------|----|----------|----------|----------|
| C         | -3.67969 | 0.716224 | 1.763264 | C  | -2.01193 | 2.446871 | 0.587099 |
| C         | -2.2185  | 0.000125 | 0.14893  | C  | -1.24887 | 2.921419 | 1.667501 |
| C         | -2.75179 | -1.17282 | 0.771683 | C  | -0.06061 | 3.613482 | 1.450333 |
| C         | -3.67961 | -0.71591 | 1.763369 | C  | 1.878983 | 3.937033 | -0.10388 |
| C         | -4.657   | -0.0006  | -2.09615 | C  | -2.75195 | 1.173106 | 0.771528 |
| C         | -5.21719 | 1.154517 | -1.47097 | H  | -4.28719 | 1.347385 | 2.40024  |
| C         | -6.12262 | 0.713958 | -0.45896 | H  | -1.43332 | 0.000157 | -0.59512 |
| C         | -6.12294 | -0.7134  | -0.45846 | H  | -4.28708 | -1.34709 | 2.400346 |
| C         | -5.2177  | -1.15507 | -1.47018 | H  | -3.92829 | -0.00098 | -2.89631 |
| C         | 1.878844 | -3.93707 | -0.10389 | H  | -4.98692 | 2.184475 | -1.7106  |
| C         | 2.381766 | -3.44533 | -1.32373 | H  | -6.69789 | 1.351111 | 0.200047 |
| C         | 3.624718 | -2.82921 | -1.39668 | H  | -6.69845 | -1.34989 | 0.200969 |
| C         | 4.428502 | -2.67097 | -0.25166 | H  | -4.98774 | -2.18526 | -1.7091  |
| C         | 4.067567 | -3.44991 | 0.866999 | H  | 1.732122 | -3.36898 | -2.18905 |
| C         | 2.822677 | -4.07124 | 0.936994 | H  | 3.87703  | -2.29651 | -2.30818 |
| C         | -0.51182 | -3.65847 | -0.89813 | H  | 4.711181 | -3.47198 | 1.742906 |
| C         | -1.68765 | -2.94172 | -0.68664 | H  | 2.544048 | -4.56347 | 1.864663 |
| C         | -2.01191 | -2.44664 | 0.587301 | H  | -0.25794 | -3.94295 | -1.91511 |
| C         | -1.24881 | -2.92123 | 1.667657 | H  | -2.3006  | -2.66305 | -1.53988 |
| C         | -0.06061 | -3.61338 | 1.450424 | H  | -1.49499 | -2.5982  | 2.675804 |
| C         | 4.428615 | 2.670865 | -0.25156 | H  | 0.581626 | -3.80032 | 2.305164 |
| C         | 3.624998 | 2.829318 | -1.39662 | H  | 3.877349 | 2.296747 | -2.30818 |
| C         | 2.382031 | 3.44549  | -1.32371 | H  | 1.73253  | 3.369261 | -2.18915 |
| C         | 2.822733 | 4.071016 | 0.937149 | H  | 2.543999 | 4.563168 | 1.864826 |
| C         | 4.067579 | 3.449663 | 0.867206 | H  | 4.711136 | 3.471617 | 1.743157 |
| C         | 5.230744 | -1.42063 | -0.14633 | H  | 5.87345  | -1.21889 | -2.20767 |
| C         | 5.662268 | -0.69627 | -1.27805 | H  | 5.87348  | 1.218834 | -2.2076  |
| C         | 5.66229  | 0.696165 | -1.278   | H  | 4.871402 | 1.20524  | 1.974859 |
| C         | 5.230789 | 1.420478 | -0.14624 | H  | 4.871369 | -1.20551 | 1.974789 |
| C         | 5.148575 | 0.695077 | 1.057573 | H  | -0.25762 | 3.94291  | -1.91522 |
| C         | 5.148555 | -0.6953  | 1.057532 | H  | -2.30043 | 2.663198 | -1.54011 |
| C         | 0.409368 | -3.87426 | 0.147697 | H  | -1.49516 | 2.598449 | 2.675638 |
| C         | 0.409497 | 3.874277 | 0.147641 | H  | 0.581568 | 3.800414 | 2.305118 |
| C         | -0.51163 | 3.658505 | -0.89826 | Fe | -4.23358 | -4E-06   | -0.08596 |
| C         | -1.68754 | 2.94186  | -0.68683 |    |          |          |          |

**Fe-[6]CPP**

|   |          |          |          |    |          |          |          |
|---|----------|----------|----------|----|----------|----------|----------|
| C | 4.604679 | 0.67891  | -1.63153 | C  | 2.476216 | 3.188111 | -1.7287  |
| C | 2.966199 | -0.00924 | -0.18345 | C  | 2.896695 | 2.460717 | -0.60206 |
| C | 3.567864 | -1.19296 | -0.71603 | C  | 2.336856 | 2.814932 | 0.637049 |
| C | 4.60118  | -0.75316 | -1.60752 | C  | 1.246199 | 3.673527 | 0.709954 |
| C | 5.754426 | -1.1364  | 1.790267 | C  | -0.76589 | 4.603079 | -0.41906 |
| C | 5.13909  | 0.037442 | 2.322005 | C  | 3.574188 | 1.152919 | -0.75485 |
| C | 5.778091 | 1.173165 | 1.737795 | H  | 5.284817 | 1.297293 | -2.20424 |
| C | 6.787977 | 0.70109  | 0.846313 | H  | 2.102944 | 0.004473 | 0.467498 |
| C | 6.773328 | -0.72602 | 0.878679 | H  | 5.278174 | -1.39352 | -2.15945 |
| C | -4.79036 | -3.25664 | 0.137551 | H  | 5.484333 | -2.15853 | 2.022044 |
| C | -5.0287  | -2.74125 | 1.42681  | H  | 4.325869 | 0.06191  | 3.035869 |
| C | -5.66305 | -1.5182  | 1.612301 | H  | 5.529366 | 2.210082 | 1.92312  |
| C | -6.0601  | -0.72679 | 0.515273 | H  | 7.440045 | 1.317778 | 0.24159  |
| C | -6.09731 | -1.38896 | -0.72895 | H  | 7.412294 | -1.38274 | 0.302804 |
| C | -5.4929  | -2.62793 | -0.91001 | H  | -4.58526 | -3.2212  | 2.293763 |
| C | -2.86567 | -4.73294 | 0.912025 | H  | -5.7194  | -1.12303 | 2.621627 |
| C | -1.49898 | -4.97399 | 0.790542 | H  | -6.47735 | -0.87753 | -1.60763 |
| C | -0.79338 | -4.60559 | -0.37187 | H  | -5.46174 | -3.04256 | -1.91325 |
| C | -1.57199 | -4.2301  | -1.48132 | H  | -3.34765 | -4.95306 | 1.860643 |
| C | -2.93314 | -3.98449 | -1.35769 | H  | -0.95914 | -5.371   | 1.646572 |
| C | -3.5926  | -4.10196 | -0.11899 | H  | -1.0843  | -3.96242 | -2.41346 |
| C | 1.402509 | -4.12888 | -1.55545 | H  | -3.44405 | -3.53719 | -2.20337 |
| C | 2.49409  | -3.26494 | -1.63564 | H  | 1.070184 | -4.63823 | -2.45626 |
| C | 2.882997 | -2.49191 | -0.52822 | H  | 2.967656 | -3.09512 | -2.59923 |
| C | 2.286927 | -2.79513 | 0.707893 | H  | 2.607066 | -2.25907 | 1.597368 |
| C | 1.190541 | -3.64641 | 0.783812 | H  | 0.663542 | -3.73463 | 1.729265 |
| C | -3.55115 | 4.132901 | -0.04614 | H  | -3.23407 | 5.031332 | 1.898785 |
| C | -2.7845  | 4.785908 | 0.939951 | H  | -0.84693 | 5.435504 | 1.578048 |
| C | -1.42292 | 5.015248 | 0.757506 | H  | -1.1351  | 3.89655  | -2.427   |
| C | -1.58709 | 4.200461 | -1.4879  | H  | -3.50003 | 3.496468 | -2.10993 |
| C | -2.94608 | 3.971724 | -1.30627 | H  | -5.22365 | 0.855574 | 2.591595 |
| C | -6.0263  | 0.7616   | 0.580199 | H  | -4.12179 | 2.974363 | 2.326474 |
| C | -5.38413 | 1.393029 | 1.66358  | H  | -5.73342 | 3.337299 | -1.64215 |
| C | -4.75139 | 2.620671 | 1.515763 | H  | -6.84387 | 1.194248 | -1.38356 |
| C | -4.7301  | 3.286244 | 0.276562 | H  | 1.032437 | 4.532366 | -2.56316 |
| C | -5.61804 | 2.800692 | -0.70384 | H  | 2.9207   | 2.976846 | -2.69796 |
| C | -6.25344 | 1.571043 | -0.55348 | H  | 2.680858 | 2.31306  | 1.537441 |
| C | 0.649131 | -4.24219 | -0.37132 | H  | 0.748037 | 3.80203  | 1.666226 |
| C | 0.673305 | 4.225805 | -0.45168 | Fe | 4.945825 | -0.00699 | 0.277457 |
| C | 1.389687 | 4.059227 | -1.65218 |    |          |          |          |

**Fe-[7]CPP**

|   |          |          |          |    |          |          |          |
|---|----------|----------|----------|----|----------|----------|----------|
| C | 5.476504 | 0.715462 | -1.48219 | C  | 2.442811 | 4.226706 | -1.66512 |
| C | 3.741172 | 0.000011 | -0.16257 | C  | 3.454952 | 3.26814  | -1.68176 |
| C | 4.385935 | -1.17204 | -0.67145 | C  | 3.732432 | 2.493108 | -0.54302 |
| C | 5.476425 | -0.71545 | -1.48228 | C  | 3.095189 | 2.853913 | 0.655998 |
| C | 7.474778 | 0.713306 | 1.148128 | C  | 2.082572 | 3.806599 | 0.670668 |
| C | 7.474454 | -0.71427 | 1.148257 | C  | 0.298508 | 5.023706 | -0.56654 |
| C | 6.398124 | -1.15534 | 1.975537 | C  | 4.386078 | 1.17207  | -0.67128 |
| C | 5.732967 | 0.000021 | 2.487531 | H  | 6.192525 | 1.346326 | -1.99423 |
| C | 6.398627 | 1.155019 | 1.975321 | H  | 2.837896 | 0.000076 | 0.432358 |
| C | -6.54664 | -1.42933 | 0.646406 | H  | 6.192354 | -1.34636 | -1.9944  |
| C | -6.07084 | -0.69344 | 1.747645 | H  | 8.161145 | 1.349992 | 0.605214 |
| C | -6.07082 | 0.693626 | 1.747628 | H  | 8.160581 | -1.35129 | 0.605438 |
| C | -6.54658 | 1.429506 | 0.64637  | H  | 6.123566 | -2.18509 | 2.164293 |
| C | -7.24403 | 0.696784 | -0.3355  | H  | 4.870771 | 0.00029  | 3.141859 |
| C | -7.24406 | -0.6966  | -0.33548 | H  | 6.124543 | 2.184915 | 2.163969 |
| C | -5.74728 | -3.24337 | -0.89204 | H  | -5.54582 | -1.19981 | 2.550308 |
| C | -4.75673 | -4.18333 | -1.15525 | H  | -5.54578 | 1.199997 | 2.550278 |
| C | -3.94291 | -4.69598 | -0.12592 | H  | -7.72366 | 1.216238 | -1.16084 |
| C | -4.38152 | -4.44435 | 1.189    | H  | -7.72371 | -1.21605 | -1.16082 |
| C | -5.39586 | -3.53128 | 1.453415 | H  | -6.23181 | -2.75826 | -1.73406 |
| C | -6.00182 | -2.79344 | 0.417721 | H  | -4.5436  | -4.42812 | -2.19129 |
| C | -1.724   | -5.69088 | 0.624466 | H  | -3.84263 | -4.86669 | 2.031353 |
| C | -0.33531 | -5.62016 | 0.539435 | H  | -5.6347  | -3.30988 | 2.489502 |
| C | 0.298277 | -5.02366 | -0.5666  | H  | -2.16644 | -6.10097 | 1.527885 |
| C | -0.5204  | -4.69871 | -1.66214 | H  | 0.262189 | -5.96991 | 1.377648 |
| C | -1.90491 | -4.75805 | -1.5712  | H  | -0.07712 | -4.2508  | -2.54643 |
| C | -2.54986 | -5.15234 | -0.38341 | H  | -2.48339 | -4.35155 | -2.39351 |
| C | 2.082335 | -3.80649 | 0.670531 | H  | 1.522766 | -3.9653  | 1.587927 |
| C | 3.094959 | -2.85381 | 0.655832 | H  | 3.324728 | -2.30472 | 1.565016 |
| C | 3.732214 | -2.49304 | -0.54319 | H  | 3.958783 | -3.0411  | -2.61778 |
| C | 3.454707 | -3.2681  | -1.68191 | H  | 2.196112 | -4.75006 | -2.58549 |
| C | 2.442548 | -4.22664 | -1.66525 | H  | -2.48309 | 4.351288 | -2.39346 |
| C | -2.54964 | 5.152354 | -0.38348 | H  | -0.0768  | 4.250589 | -2.54629 |
| C | -1.90463 | 4.757906 | -1.57119 | H  | 0.262322 | 5.970165 | 1.377607 |
| C | -0.52013 | 4.698599 | -1.66207 | H  | -2.16631 | 6.101192 | 1.527727 |
| C | -0.33512 | 5.620301 | 0.539403 | H  | -6.23169 | 2.758392 | -1.73411 |
| C | -1.72383 | 5.691011 | 0.624367 | H  | -4.54343 | 4.428191 | -2.19137 |
| C | -6.00169 | 2.793594 | 0.417667 | H  | -3.84236 | 4.866745 | 2.031258 |
| C | -5.74714 | 3.243492 | -0.8921  | H  | -5.63452 | 3.310014 | 2.489446 |
| C | -4.75655 | 4.18342  | -1.15533 | H  | 2.196376 | 4.750112 | -2.58537 |
| C | -3.9427  | 4.69603  | -0.12601 | H  | 3.959025 | 3.0411   | -2.61762 |
| C | -4.3813  | 4.444427 | 1.188925 | H  | 3.324965 | 2.304832 | 1.565181 |
| C | -5.39568 | 3.531409 | 1.453354 | H  | 1.522985 | 3.965453 | 1.588046 |
| C | 1.665938 | -4.44452 | -0.51262 | Fe | 5.685496 | -0.00012 | 0.434213 |
| C | 1.666196 | 4.444611 | -0.51251 |    |          |          |          |

**Fe-[8]CPP**

|   |          |          |          |   |          |          |          |
|---|----------|----------|----------|---|----------|----------|----------|
| C | -6.18667 | -0.64949 | -1.59611 | C | 3.859324 | 5.874668 | -1.00718 |
| C | -5.14284 | -1.13236 | -0.74021 | C | 5.096235 | 5.237285 | -0.97139 |
| C | -4.51301 | 0.022638 | -0.17631 | C | -4.50329 | 2.535913 | -0.4859  |
| C | -5.12404 | 1.210381 | -0.69042 | C | -3.88083 | 2.84271  | 0.736024 |
| C | -6.17567 | 0.780406 | -1.56528 | C | -2.93858 | 3.859877 | 0.826061 |
| C | -8.29602 | 0.756831 | 0.966612 | C | -2.58204 | 4.626214 | -0.29901 |
| C | -7.25475 | 1.151509 | 1.859489 | C | -3.3366  | 4.433175 | -1.47025 |
| C | -6.63831 | -0.03169 | 2.368783 | C | -4.27534 | 3.406655 | -1.56424 |
| C | -7.29874 | -1.15747 | 1.789129 | H | -6.88136 | -1.26324 | -2.15599 |
| C | -8.32324 | -0.66987 | 0.92321  | H | -3.64215 | 0.001127 | 0.464661 |
| C | -3.96218 | -2.84736 | 0.63899  | H | -6.86046 | 1.428109 | -2.09847 |
| C | -3.0348  | -3.87935 | 0.708039 | H | -8.94141 | 1.423377 | 0.409473 |
| C | -2.65096 | -4.59492 | -0.44143 | H | -6.96958 | 2.169425 | 2.091794 |
| C | -3.36383 | -4.33408 | -1.62546 | H | -5.8107  | -0.06849 | 3.065413 |
| C | -4.28854 | -3.2927  | -1.69773 | H | -7.05274 | -2.1977  | 1.958908 |
| C | -4.54271 | -2.47429 | -0.58478 | H | -8.99289 | -1.27627 | 0.327322 |
| C | 5.067265 | -5.2954  | -0.78011 | H | -4.17566 | -2.26055 | 1.528243 |
| C | 3.825393 | -5.91491 | -0.89943 | H | -2.52013 | -4.05993 | 1.647072 |
| C | 2.84578  | -5.78336 | 0.102152 | H | -3.1422  | -4.90528 | -2.5232  |
| C | 3.245258 | -5.16835 | 1.301246 | H | -4.74653 | -3.05154 | -2.65352 |
| C | 4.478347 | -4.53984 | 1.413856 | H | 5.769543 | -5.37757 | -1.60489 |
| C | 5.385324 | -4.49856 | 0.338158 | H | 3.590897 | -6.45519 | -1.81316 |
| C | 6.787106 | -2.71344 | 1.455954 | H | 2.527271 | -5.05374 | 2.107786 |
| C | 7.293563 | -1.42142 | 1.372369 | H | 4.671598 | -3.95696 | 2.307873 |
| C | 7.496658 | -0.7893  | 0.130548 | H | 6.580248 | -3.12293 | 2.440062 |
| C | 7.389217 | -1.61257 | -1.00698 | H | 7.417099 | -0.85997 | 2.293173 |
| C | 6.849693 | -2.8913  | -0.92554 | H | 7.631752 | -1.21813 | -1.98904 |
| C | 6.421524 | -3.43255 | 0.301771 | H | 6.651652 | -3.42308 | -1.85098 |
| C | -0.49541 | -5.25839 | -1.51099 | H | -0.8409  | -4.81001 | -2.43776 |
| C | 0.856146 | -5.55914 | -1.37831 | H | 1.525209 | -5.33622 | -2.20439 |
| C | 1.393374 | -5.96896 | -0.14535 | H | 0.842953 | -6.65117 | 1.830959 |
| C | 0.479771 | -6.25289 | 0.887    | H | -1.53892 | -6.13207 | 1.593473 |
| C | -0.87342 | -5.95553 | 0.752503 | H | -0.84566 | 4.895847 | -2.34487 |
| C | -1.37518 | -5.35655 | -0.41857 | H | 1.528361 | 5.392241 | -2.18765 |
| C | -1.29519 | 5.368856 | -0.28709 | H | 1.021501 | 6.562415 | 1.918741 |
| C | -0.45974 | 5.304955 | -1.41599 | H | -1.36888 | 6.060461 | 1.760422 |
| C | 0.897748 | 5.58988  | -1.32616 | H | 5.999465 | 2.968952 | -2.02462 |
| C | 1.489442 | 5.953653 | -0.10325 | H | 6.848606 | 0.708531 | -2.04    |
| C | 0.619907 | 6.200206 | 0.975885 | H | 8.130862 | 1.156203 | 2.045298 |
| C | -0.74004 | 5.914043 | 0.886032 | H | 7.245238 | 3.427953 | 2.063127 |
| C | 6.47525  | 3.363957 | 0.043108 | H | 4.94233  | 3.977771 | 2.171632 |
| C | 6.503177 | 2.599659 | -1.13642 | H | 2.778285 | 5.087259 | 2.107505 |
| C | 6.992015 | 1.299991 | -1.14231 | H | 3.563496 | 6.402213 | -1.91021 |
| C | 7.487954 | 0.694439 | 0.027624 | H | 5.737476 | 5.27758  | -1.84819 |
| C | 7.664027 | 1.539339 | 1.142287 | H | -4.0737  | 2.215918 | 1.602464 |
| C | 7.162719 | 2.838803 | 1.153218 | H | -2.39225 | 3.988668 | 1.755819 |
| C | 5.485704 | 4.467154 | 0.140956 | H | -3.13686 | 5.046357 | -2.34509 |

|   |          |          |          |    |          |          |          |
|---|----------|----------|----------|----|----------|----------|----------|
| C | 4.673614 | 4.546296 | 1.286114 | H  | -4.76607 | 3.21846  | -2.51564 |
| C | 3.436325 | 5.180262 | 1.248696 | Fe | -6.48703 | 0.027716 | 0.321518 |
| C | 2.953747 | 5.768035 | 0.065874 |    |          |          |          |

**Fe-[8]CPP (B3LYP-D3(BJ)/6-31G(d) for C, H, SDD for Fe)**

|   |          |          |          |   |          |          |          |
|---|----------|----------|----------|---|----------|----------|----------|
| C | 0.428177 | 6.255531 | 0.896673 | C | -5.11003 | 1.117434 | -0.82529 |
| C | 0.606141 | -6.19578 | 0.985998 | C | -6.19345 | -0.79486 | -1.57711 |
| C | 0.81384  | 5.595233 | -1.37918 | C | -6.20874 | 0.635265 | -1.60815 |
| C | 0.886924 | -5.61472 | -1.32517 | C | -6.35481 | 0.010966 | 2.406886 |
| C | 1.342624 | 5.989122 | -0.13838 | C | -7.01791 | -1.16855 | 1.948635 |
| C | 1.473987 | -5.96298 | -0.09641 | C | -7.05863 | 1.142252 | 1.891202 |
| C | 2.789623 | 5.795782 | 0.114117 | C | -8.13242 | -0.76584 | 1.15265  |
| C | 2.93367  | -5.76941 | 0.073971 | C | -8.15753 | 0.661591 | 1.117122 |
| C | 3.173723 | 5.156795 | 1.304749 | H | 0.791244 | 6.637437 | 1.846814 |
| C | 3.406862 | -5.16757 | 1.252592 | H | 1.010151 | -6.54198 | 1.933199 |
| C | 3.773362 | 5.93909  | -0.88035 | H | 1.489377 | 5.383064 | -2.20221 |
| C | 3.83818  | -5.87841 | -0.99856 | H | 1.521571 | -5.4239  | -2.18458 |
| C | 4.403121 | 4.522841 | 1.416085 | H | 2.445235 | 5.028461 | 2.099008 |
| C | 4.639873 | -4.52676 | 1.287085 | H | 2.74293  | -5.06912 | 2.105575 |
| C | 5.011831 | 5.314149 | -0.76203 | H | 3.542983 | 6.492539 | -1.78664 |
| C | 5.069983 | -5.23282 | -0.96642 | H | 3.543019 | -6.41273 | -1.89717 |
| C | 5.3178   | 4.502223 | 0.347437 | H | 4.588547 | 3.918937 | 2.297095 |
| C | 5.451771 | -4.45579 | 0.142398 | H | 4.905405 | -3.94509 | 2.164446 |
| C | 6.351067 | 3.438651 | 0.304896 | H | 5.712775 | -5.26963 | -1.84163 |
| C | 6.429989 | -3.34786 | 0.037922 | H | 5.721648 | 5.403306 | -1.57897 |
| C | 6.433295 | -2.58147 | -1.13951 | H | 5.916649 | -2.95369 | -2.01847 |
| C | 6.717463 | 2.718246 | 1.456867 | H | 6.509943 | 3.126856 | 2.440671 |
| C | 6.770318 | 2.902117 | -0.92643 | H | 6.561899 | 3.436359 | -1.8476  |
| C | 6.912096 | -1.27887 | -1.1474  | H | 6.749948 | -0.68183 | -2.03754 |
| C | 7.122124 | -2.82228 | 1.143482 | H | 7.213572 | -3.41428 | 2.050102 |
| C | 7.223645 | 1.427348 | 1.368157 | H | 7.347218 | 0.859638 | 2.284466 |
| C | 7.311672 | 1.625287 | -1.0129  | H | 7.549363 | 1.229931 | -1.99521 |
| C | 7.421659 | -0.67735 | 0.017804 | H | 8.087853 | -1.13291 | 2.027102 |
| C | 7.425981 | 0.80278  | 0.123419 | H | -0.85866 | -4.93415 | -2.35239 |
| C | 7.614732 | -1.52037 | 1.129864 | H | -0.8808  | 4.853484 | -2.45107 |
| C | -0.47034 | -5.33399 | -1.42096 | H | -1.38489 | -6.04162 | 1.765131 |
| C | -0.53602 | 5.293161 | -1.52034 | H | -1.59304 | 6.111877 | 1.594822 |
| C | -0.75309 | -5.91205 | 0.890808 | H | -2.35928 | -3.94515 | 1.715784 |
| C | -0.92269 | 5.955799 | 0.754273 | H | -2.50646 | 4.008347 | 1.605587 |
| C | -1.30447 | -5.38637 | -0.29162 | H | -3.15471 | -5.11758 | -2.34118 |
| C | -1.41605 | 5.374443 | -0.42792 | H | -3.19142 | 4.966322 | -2.52733 |
| C | -2.58504 | -4.6401  | -0.31437 | H | -3.53466 | -0.01002 | 0.28596  |
| C | -2.68046 | 4.601155 | -0.46177 | H | -4.03056 | -2.1538  | 1.522769 |
| C | -2.91878 | -3.83776 | 0.791642 | H | -4.13951 | 2.179745 | 1.450336 |
| C | -3.03495 | 3.846602 | 0.671317 | H | -4.77465 | -3.27602 | -2.55091 |
| C | -3.34602 | -4.47723 | -1.48467 | H | -4.77529 | 3.08876  | -2.69389 |
| C | -3.39965 | 4.366168 | -1.64596 | H | -5.45578 | 0.041604 | 3.008315 |
| C | -3.85085 | -2.81478 | 0.679987 | H | -6.7031  | -2.1875  | 2.130786 |
| C | -3.94562 | 2.802816 | 0.582323 | H | -6.78023 | 2.179452 | 2.022352 |



|   |          |          |          |    |          |          |          |
|---|----------|----------|----------|----|----------|----------|----------|
| C | -4.27614 | -3.4454  | -1.60039 | H  | -6.92317 | -1.44593 | -2.04058 |
| C | -4.30955 | 3.313583 | -1.73824 | H  | -6.95189 | 1.250174 | -2.09886 |
| C | -4.43573 | -0.03329 | -0.31041 | H  | -8.81402 | -1.42737 | 0.634907 |
| C | -4.48308 | -2.54436 | -0.54498 | H  | -8.86159 | 1.272248 | 0.567891 |
| C | -4.53633 | 2.462837 | -0.64574 | Fe | -6.37356 | -0.0408  | 0.344006 |
| C | -5.0847  | -1.21949 | -0.77489 |    |          |          |          |

**Fe-[9]CPP**

|   |          |          |          |   |          |          |          |
|---|----------|----------|----------|---|----------|----------|----------|
| C | 7.079595 | 0.715414 | -1.30474 | C | -5.82214 | -5.03271 | -0.0299  |
| C | 5.256384 | 0.00013  | -0.10817 | C | -6.11969 | -4.68938 | 1.301915 |
| C | 5.937386 | -1.17183 | -0.56733 | C | -6.96142 | -3.62311 | 1.601594 |
| C | 7.079664 | -0.71511 | -1.30466 | C | -1.8358  | -6.51859 | -0.64519 |
| C | 8.894169 | -0.71379 | 1.456877 | C | -2.62943 | -7.05147 | 0.388666 |
| C | 7.762555 | -1.15519 | 2.206355 | C | -3.96849 | -6.69247 | 0.533247 |
| C | 7.063476 | 0.000201 | 2.670902 | C | -4.58133 | -5.78349 | -0.34997 |
| C | 7.762832 | 1.155435 | 2.206473 | C | -3.8306  | -5.38724 | -1.47154 |
| C | 8.894307 | 0.713899 | 1.456946 | C | -2.49732 | -5.74373 | -1.61462 |
| C | -7.52781 | 2.832614 | 0.583819 | H | 7.830053 | 1.34554  | -1.76551 |
| C | -6.96165 | 3.622747 | 1.601706 | H | 4.31692  | 0.000155 | 0.42711  |
| C | -6.11998 | 4.689081 | 1.302074 | H | 7.830276 | -1.34518 | -1.76526 |
| C | -5.82247 | 5.032504 | -0.02973 | H | 9.616344 | -1.35063 | 0.962751 |
| C | -6.5775  | 4.39374  | -1.03079 | H | 7.472724 | -2.18469 | 2.372359 |
| C | -7.40072 | 3.313166 | -0.73285 | H | 6.158165 | 0.000273 | 3.264248 |
| C | -8.76052 | 0.696569 | -0.06264 | H | 7.473186 | 2.184993 | 2.372523 |
| C | -8.76047 | -0.69699 | -0.06265 | H | 9.616671 | 1.350615 | 0.962933 |
| C | -7.94696 | -1.42828 | 0.824267 | H | -7.10232 | 3.34401  | 2.642244 |
| C | -7.28781 | -0.69406 | 1.826661 | H | -5.59562 | 5.183831 | 2.114594 |
| C | -7.28786 | 0.6937   | 1.826681 | H | -6.44861 | 4.682876 | -2.07001 |
| C | -7.94706 | 1.427897 | 0.824301 | H | -7.85498 | 2.763474 | -1.55203 |
| C | 0.405985 | -6.27891 | -1.78434 | H | -9.35656 | 1.220945 | -0.80502 |
| C | 1.718959 | -5.82661 | -1.71218 | H | -9.35647 | -1.22139 | -0.80505 |
| C | 2.352606 | -5.61084 | -0.47445 | H | -6.64877 | -1.2083  | 2.537056 |
| C | 1.664443 | -6.05021 | 0.671677 | H | -6.64887 | 1.207962 | 2.537092 |
| C | 0.343013 | -6.47948 | 0.60155  | H | -0.062   | -6.37097 | -2.76029 |
| C | -0.35086 | -6.51518 | -0.6218  | H | 2.220461 | -5.53806 | -2.63118 |
| C | 4.437044 | -4.52862 | -1.45435 | H | 2.139672 | -5.98117 | 1.646003 |
| C | 5.308697 | -3.43947 | -1.47716 | H | -0.18691 | -6.68822 | 1.526419 |
| C | 5.337922 | -2.51404 | -0.42137 | H | 4.408464 | -5.19386 | -2.31312 |
| C | 4.566662 | -2.8093  | 0.715707 | H | 5.9133   | -3.26028 | -2.3625  |
| C | 3.688196 | -3.88308 | 0.730475 | H | 4.601907 | -2.13925 | 1.570106 |
| C | -0.35129 | 6.515203 | -0.62182 | H | 3.031591 | -4.00485 | 1.585988 |
| C | 0.405507 | 6.278937 | -1.7844  | H | -0.06254 | 6.370982 | -2.76032 |
| C | 1.718493 | 5.826658 | -1.7123  | H | 2.219927 | 5.538106 | -2.63133 |
| C | 1.664077 | 6.050244 | 0.671557 | H | 2.139347 | 5.981238 | 1.645864 |
| C | 0.342633 | 6.479489 | 0.601494 | H | -0.18725 | 6.688191 | 1.526393 |
| C | -4.58168 | 5.783344 | -0.34979 | H | -4.53028 | 7.086716 | 1.376481 |
| C | -3.96884 | 6.69231  | 0.533432 | H | -2.18326 | 7.717886 | 1.122062 |

|   |          |          |          |    |          |          |          |
|---|----------|----------|----------|----|----------|----------|----------|
| C | -2.6298  | 7.051383 | 0.388792 | H  | -1.93149 | 5.303899 | -2.42902 |
| C | -1.83622 | 6.518578 | -0.64514 | H  | -4.25487 | 4.681798 | -2.17874 |
| C | -2.49775 | 5.743728 | -1.61456 | H  | 4.407925 | 5.193876 | -2.3134  |
| C | -3.83101 | 5.387187 | -1.47143 | H  | 5.912844 | 3.260407 | -2.36279 |
| C | 3.547497 | -4.73243 | -0.38353 | H  | 4.601844 | 2.139551 | 1.570019 |
| C | 3.54715  | 4.732553 | -0.38369 | H  | 3.031472 | 4.005055 | 1.585908 |
| C | 4.436614 | 4.528703 | -1.45458 | H  | -7.8548  | -2.76374 | -1.55211 |
| C | 5.308334 | 3.439605 | -1.47738 | H  | -6.44833 | -4.68305 | -2.07017 |
| C | 5.337716 | 2.514258 | -0.42154 | H  | -5.59531 | -5.18415 | 2.114407 |
| C | 4.566532 | 2.809545 | 0.715578 | H  | -7.10212 | -3.34443 | 2.642145 |
| C | 3.688009 | 3.883288 | 0.730347 | H  | -2.18293 | -7.71798 | 1.121953 |
| C | 2.352221 | 5.610911 | -0.47459 | H  | -4.52998 | -7.08692 | 1.376247 |
| C | 5.93726  | 1.172071 | -0.5675  | H  | -4.25443 | -4.68183 | -2.17884 |
| C | -7.52761 | -2.83296 | 0.583734 | H  | -1.93103 | -5.30382 | -2.42901 |
| C | -7.4005  | -3.31345 | -0.73295 | Fe | 7.158837 | 0.000218 | 0.619652 |
| C | -6.57721 | -4.39396 | -1.03094 |    |          |          |          |

**Fe-[10]CPP**

|   |          |          |          |   |          |          |          |
|---|----------|----------|----------|---|----------|----------|----------|
| C | -7.86524 | -0.82299 | -1.2732  | C | 8.945338 | -1.47925 | 1.629278 |
| C | -6.69887 | -1.25001 | -0.55588 | C | 8.892582 | -0.61277 | 0.522181 |
| C | -6.0423  | -0.06127 | -0.1041  | C | 8.608825 | -1.1884  | -0.72824 |
| C | -6.76409 | 1.092419 | -0.54745 | C | 8.216598 | -2.51785 | -0.83638 |
| C | -7.90486 | 0.606485 | -1.26835 | C | 8.836298 | 0.864125 | 0.660952 |
| C | -8.48155 | -1.29409 | 2.244275 | C | 8.088314 | 1.412585 | 1.716866 |
| C | -7.80307 | -0.12444 | 2.703585 | C | 7.635422 | 2.725386 | 1.67343  |
| C | -8.53814 | 1.01583  | 2.257624 | C | 7.91544  | 3.562424 | 0.57798  |
| C | -9.67106 | 0.550689 | 1.524742 | C | 8.817028 | 3.067107 | -0.38406 |
| C | -9.63617 | -0.87659 | 1.516568 | C | 9.26041  | 1.747476 | -0.34829 |
| C | -5.27771 | -2.85849 | 0.708642 | H | -8.60577 | -1.47235 | -1.72309 |
| C | -4.42229 | -3.95013 | 0.730621 | H | -5.0956  | -0.03637 | 0.41771  |
| C | -4.33731 | -4.83939 | -0.35746 | H | -8.67996 | 1.217064 | -1.71432 |
| C | -5.24167 | -4.63897 | -1.41591 | H | -8.16314 | -2.31697 | 2.398585 |
| C | -6.09068 | -3.53217 | -1.44628 | H | -6.88793 | -0.10541 | 3.281363 |
| C | -6.08084 | -2.58331 | -0.41131 | H | -8.27057 | 2.051285 | 2.424069 |
| C | 3.019736 | -6.48025 | -1.51074 | H | -10.4169 | 1.172215 | 1.046432 |
| C | 1.641153 | -6.61581 | -1.61758 | H | -10.3508 | -1.52825 | 1.030909 |
| C | 0.875401 | -7.17584 | -0.57887 | H | -5.27853 | -2.16683 | 1.546327 |
| C | 1.584385 | -7.72872 | 0.50509  | H | -3.74709 | -4.06467 | 1.572552 |
| C | 2.964298 | -7.57962 | 0.620224 | H | -5.25061 | -5.32947 | -2.25497 |
| C | 3.705327 | -6.88583 | -0.35293 | H | -6.71611 | -3.36487 | -2.31937 |
| C | 5.999011 | -6.14478 | -1.14067 | H | 3.555582 | -5.9388  | -2.28492 |
| C | 7.07858  | -5.28158 | -0.97662 | H | 1.144351 | -6.17122 | -2.47382 |
| C | 7.268729 | -4.57067 | 0.223647 | H | 1.045824 | -8.24268 | 1.296415 |
| C | 6.434629 | -4.91023 | 1.30394  | H | 3.468343 | -7.97011 | 1.500698 |
| C | 5.362964 | -5.78188 | 1.144287 | H | 5.846754 | -6.62775 | -2.10252 |
| C | 5.067134 | -6.34908 | -0.10694 | H | 7.750914 | -5.11457 | -1.81378 |
| C | -2.54118 | -6.24087 | 0.730963 | H | 6.544428 | -4.3901  | 2.250597 |
| C | -1.2694  | -6.79915 | 0.671558 | H | 4.670419 | -5.9205  | 1.969635 |
| C | -0.59427 | -6.9608  | -0.55233 | H | -3.00154 | -6.0933  | 1.703584 |
| C | -1.32913 | -6.68143 | -1.71936 | H | -0.75907 | -7.02602 | 1.602664 |
| C | -2.59112 | -6.09909 | -1.65902 | H | -0.88277 | -6.85667 | -2.69388 |
| C | -3.19753 | -5.78869 | -0.4282  | H | -3.07011 | -5.79723 | -2.58587 |
| C | -3.45119 | 5.756206 | -0.44371 | H | -3.32969 | 5.708739 | -2.60111 |
| C | -2.85243 | 6.04198  | -1.68428 | H | -1.14757 | 6.783925 | -2.73987 |
| C | -1.5963  | 6.633148 | -1.76214 | H | -1.02161 | 7.08073  | 1.547683 |
| C | -0.86423 | 6.94969  | -0.60329 | H | -3.25794 | 6.118046 | 1.679365 |
| C | -1.53493 | 6.820968 | 0.626242 | H | 4.694964 | 6.580985 | 1.979733 |
| C | -2.8007  | 6.248425 | 0.702643 | H | 6.652317 | 5.201685 | 2.426567 |
| C | 4.82935  | 6.445861 | -0.17288 | H | 7.269946 | 4.721246 | -1.8035  |
| C | 5.277432 | 6.212635 | 1.139996 | H | 5.393257 | 6.204354 | -2.24577 |
| C | 6.381126 | 5.404114 | 1.394405 | H | 3.221891 | 8.220282 | 1.276188 |
| C | 7.077716 | 4.768175 | 0.349918 | H | 0.791967 | 8.432948 | 1.091798 |
| C | 6.740975 | 5.155375 | -0.96059 | H | 0.847581 | 5.921565 | -2.39888 |
| C | 5.652955 | 5.982096 | -1.21469 | H | 3.25426  | 5.710778 | -2.21646 |
| C | 3.443192 | 6.910352 | -0.4306  | H | -5.40157 | 2.082543 | 1.562738 |

|   |          |          |          |    |          |          |          |
|---|----------|----------|----------|----|----------|----------|----------|
| C | 2.709488 | 7.71262  | 0.463076 | H  | -3.9498  | 4.044075 | 1.581499 |
| C | 1.324734 | 7.833514 | 0.358182 | H  | -5.50136 | 5.226449 | -2.25284 |
| C | 0.604946 | 7.158043 | -0.64515 | H  | -6.88541 | 3.203245 | -2.30862 |
| C | 1.357497 | 6.470467 | -1.61371 | H  | 8.570161 | -3.43841 | 2.407078 |
| C | 2.735725 | 6.350174 | -1.50941 | H  | 9.236072 | -1.08999 | 2.601685 |
| C | -6.21605 | 2.45559  | -0.3986  | H  | 8.563103 | -0.55451 | -1.60909 |
| C | -5.42944 | 2.770706 | 0.722599 | H  | 7.874115 | -2.88097 | -1.8005  |
| C | -4.61984 | 3.897313 | 0.740264 | H  | 7.74319  | 0.76571  | 2.518107 |
| C | -4.56748 | 4.780576 | -0.35451 | H  | 6.947424 | 3.058554 | 2.443706 |
| C | -5.46563 | 4.541164 | -1.41022 | H  | 9.132871 | 3.703402 | -1.20622 |
| C | -6.26827 | 3.400498 | -1.43589 | H  | 9.90306  | 1.382698 | -1.14558 |
| C | 8.097176 | -3.33987 | 0.298444 | Fe | -7.93296 | -0.11598 | 0.654332 |
| C | 8.562611 | -2.8131  | 1.518391 |    |          |          |          |

### Fe-[11]CPP

|   |          |          |          |   |          |          |          |
|---|----------|----------|----------|---|----------|----------|----------|
| C | 8.616034 | 0.7173   | -1.28112 | C | -9.02868 | 2.845324 | 0.326631 |
| C | 7.45601  | 1.173461 | -0.57124 | C | -8.91341 | 3.712058 | 1.428763 |
| C | 6.762304 | 0.001591 | -0.13057 | C | -8.1898  | 4.898501 | 1.340802 |
| C | 7.456958 | -1.16959 | -0.5716  | C | -7.54252 | 5.272209 | 0.148264 |
| C | 8.616607 | -0.71227 | -1.28138 | C | -7.78963 | 4.480834 | -0.98729 |
| C | 8.497737 | -0.00062 | 2.691351 | C | -8.51553 | 3.299043 | -0.90088 |
| C | 9.210564 | -1.15454 | 2.24457  | C | -8.51107 | -3.30164 | -0.90093 |
| C | 10.36152 | -0.71084 | 1.526754 | C | -7.78453 | -4.48299 | -0.98728 |
| C | 10.35992 | 0.716866 | 1.528669 | C | -7.53859 | -5.2751  | 0.148047 |
| C | 9.207956 | 1.156055 | 2.247606 | C | -8.1873  | -4.90252 | 1.340099 |
| C | 6.075419 | 2.818213 | 0.692273 | C | -8.91168 | -3.71648 | 1.428003 |
| C | 5.291855 | 3.961959 | 0.730239 | H | 9.377851 | 1.347744 | -1.72218 |
| C | 5.29566  | 4.890771 | -0.32746 | H | 5.811969 | 0.001024 | 0.385102 |
| C | 6.205454 | 4.660968 | -1.37493 | H | 9.378884 | -1.34207 | -1.72256 |
| C | 6.981924 | 3.50278  | -1.42177 | H | 7.576327 | -0.00234 | 3.259362 |
| C | 6.891125 | 2.528398 | -0.41495 | H | 8.916244 | -2.18451 | 2.399458 |
| C | -1.86155 | 7.396556 | -1.49315 | H | 11.09757 | -1.34618 | 1.051494 |
| C | -0.47629 | 7.330831 | -1.57575 | H | 11.09456 | 1.355223 | 1.055302 |
| C | 0.343725 | 7.769291 | -0.52041 | H | 8.911242 | 2.1849   | 2.405385 |
| C | -0.29668 | 8.400169 | 0.563247 | H | 6.013131 | 2.104433 | 1.508743 |
| C | -1.68545 | 8.452943 | 0.653655 | H | 4.605852 | 4.095972 | 1.560553 |
| C | -2.50168 | 7.892667 | -0.34466 | H | 6.279514 | 5.375522 | -2.19029 |
| C | -4.37699 | 7.085149 | 1.090761 | H | 7.617412 | 3.322512 | -2.28493 |
| C | -5.60459 | 6.442091 | 1.211261 | H | -2.45719 | 6.949484 | -2.28372 |
| C | -6.45903 | 6.286283 | 0.105522 | H | -0.03246 | 6.829112 | -2.42964 |
| C | -6.09363 | 6.944218 | -1.08392 | H | 0.297306 | 8.821801 | 1.36937  |
| C | -4.8615  | 7.578827 | -1.20784 | H | -2.14361 | 8.904536 | 1.52993  |
| C | -3.94175 | 7.595906 | -0.1439  | H | -3.69533 | 7.082362 | 1.936635 |
| C | 3.618357 | 6.41091  | 0.788415 | H | -5.84695 | 5.950682 | 2.148845 |
| C | 2.412275 | 7.100268 | 0.736415 | H | -6.762   | 6.917123 | -1.94025 |
| C | 1.774464 | 7.372574 | -0.48756 | H | -4.58874 | 8.029408 | -2.15863 |
| C | 2.485383 | 7.047175 | -1.65729 | H | 4.051095 | 6.187251 | 1.75919  |

|   |          |          |          |    |          |          |          |
|---|----------|----------|----------|----|----------|----------|----------|
| C | 3.680079 | 6.336335 | -1.60517 | H  | 1.91751  | 7.352483 | 1.669465 |
| C | 4.240506 | 5.933847 | -0.37946 | H  | 2.069313 | 7.297394 | -2.62887 |
| C | 4.244446 | -5.9319  | -0.38024 | H  | 4.136892 | 6.014656 | -2.53658 |
| C | 3.623241 | -6.41002 | 0.787688 | H  | 4.056405 | -6.18672 | 1.758358 |
| C | 2.417499 | -7.10002 | 0.73598  | H  | 1.92356  | -7.35304 | 1.669236 |
| C | 1.779028 | -7.37191 | -0.48776 | H  | 2.072794 | -7.29526 | -2.62921 |
| C | 2.489162 | -7.04541 | -1.65768 | H  | 4.139562 | -6.01148 | -2.53734 |
| C | 3.683492 | -6.33396 | -1.60584 | H  | -4.58382 | -8.03182 | -2.15806 |
| C | -3.9371  | -7.5977  | -0.14337 | H  | -6.75735 | -6.91998 | -1.94018 |
| C | -4.85675 | -7.5811  | -1.20739 | H  | -5.84332 | -5.95293 | 2.148965 |
| C | -6.08912 | -6.94685 | -1.08373 | H  | -3.69115 | -7.08377 | 1.937167 |
| C | -6.45486 | -6.28895 | 0.105579 | H  | -2.45296 | -6.95379 | -2.28448 |
| C | -5.60053 | -6.44433 | 1.211475 | H  | -0.02854 | -6.83255 | -2.43085 |
| C | -4.37271 | -7.08698 | 1.09122  | H  | 0.302563 | -8.81938 | 1.371159 |
| C | -2.49696 | -7.89406 | -0.34398 | H  | -2.13811 | -8.90317 | 1.531963 |
| C | -1.85712 | -7.39945 | -1.49327 | H  | 7.618652 | -3.31767 | -2.28645 |
| C | -0.4719  | -7.33316 | -1.57608 | H  | 6.281992 | -5.37152 | -2.19203 |
| C | 0.3485   | -7.76948 | -0.52015 | H  | 4.610061 | -4.09496 | 1.560606 |
| C | -0.29159 | -8.39913 | 0.564455 | H  | 6.016156 | -2.10255 | 1.508913 |
| C | -1.6803  | -8.45248 | 0.655039 | H  | -8.59414 | 1.217652 | 2.438349 |
| C | 6.893078 | -2.52498 | -0.41558 | H  | -8.59311 | -1.2215  | 2.438177 |
| C | 6.983816 | -3.49877 | -1.42298 | H  | -10.3761 | -1.22803 | -1.47347 |
| C | 6.208065 | -4.65744 | -1.37624 | H  | -10.3772 | 1.223138 | -1.47328 |
| C | 5.299068 | -4.88831 | -0.32831 | H  | -9.35873 | 3.432957 | 2.38018  |
| C | 5.295433 | -3.96009 | 0.729903 | H  | -8.08852 | 5.521486 | 2.225496 |
| C | 6.078324 | -2.81587 | 0.692034 | H  | -7.30739 | 4.728343 | -1.92801 |
| C | -9.42868 | 1.422046 | 0.458537 | H  | -8.57973 | 2.659211 | -1.77594 |
| C | -9.02819 | 0.693393 | 1.591959 | H  | -8.57461 | -2.66112 | -1.77554 |
| C | -9.02756 | -0.69744 | 1.59186  | H  | -7.30097 | -4.72976 | -1.92753 |
| C | -9.42745 | -1.42627 | 0.458361 | H  | -8.08656 | -5.52602 | 2.224501 |
| C | -9.98378 | -0.69813 | -0.60945 | H  | -9.35819 | -3.43811 | 2.379085 |
| C | -9.98438 | 0.693512 | -0.60936 | Fe | 8.64824  | 0.002139 | 0.643844 |
| C | -9.02613 | -2.84919 | 0.326285 |    |          |          |          |

**Fe-[11]CPP (B3LYP-D3/6-31G(d) for C, H, SDD for Fe)**

|   |          |          |          |    |          |          |          |
|---|----------|----------|----------|----|----------|----------|----------|
| C | -7.38748 | -1.1689  | -0.66322 | C  | 8.122974 | -4.89481 | 1.326303 |
| C | -8.59621 | -0.71477 | -1.28666 | C  | 7.472775 | -5.2716  | 0.137492 |
| C | -8.59621 | 0.714803 | -1.28666 | C  | 7.702066 | -4.47993 | -1.00061 |
| C | -7.38748 | 1.168925 | -0.66321 | C  | 8.421675 | -3.29469 | -0.92028 |
| C | -6.6579  | 0.000011 | -0.28054 | C  | 8.94351  | -2.84208 | 0.303073 |
| C | -8.91713 | -1.15617 | 2.305325 | C  | 9.339827 | 1.42096  | 0.430833 |
| C | -8.17204 | -9.2E-05 | 2.691935 | C  | 8.943119 | 0.695054 | 1.566329 |
| C | -8.917   | 1.156102 | 2.30542  | C  | 8.943117 | -0.69507 | 1.56633  |
| C | -10.1235 | 0.714219 | 1.683421 | C  | 9.339823 | -1.42098 | 0.430834 |
| C | -10.1235 | -0.71411 | 1.683362 | C  | 9.886157 | -0.69542 | -0.64267 |
| C | -6.97796 | 3.532685 | -1.44079 | C  | 9.886159 | 0.695396 | -0.64267 |
| C | -6.21963 | 4.701243 | -1.36554 | Fe | -8.48131 | 0.000008 | 0.65191  |

|   |          |          |          |   |          |          |          |
|---|----------|----------|----------|---|----------|----------|----------|
| C | -5.29    | 4.901174 | -0.33103 | H | -7.63253 | 3.372289 | -2.29314 |
| C | -5.24024 | 3.931775 | 0.687781 | H | -6.32135 | 5.448362 | -2.14747 |
| C | -6.00406 | -2.77744 | 0.621674 | H | -4.5331  | 4.047195 | 1.502476 |
| C | -5.24025 | -3.93176 | 0.687775 | H | -5.91395 | -2.02792 | 1.401955 |
| C | -5.29001 | -4.90116 | -0.33104 | H | -4.53312 | -4.04719 | 1.502472 |
| C | -6.21964 | -4.70122 | -1.36555 | H | -6.32136 | -5.44834 | -2.14749 |
| C | -6.97796 | -3.53266 | -1.4408  | H | -7.63253 | -3.37226 | -2.29316 |
| C | -6.00405 | 2.777455 | 0.621681 | H | -5.91393 | 2.027936 | 1.401959 |
| C | -6.84363 | 2.523642 | -0.47609 | H | 4.534786 | 8.056698 | -2.14646 |
| C | -6.84364 | -2.52362 | -0.4761  | H | 6.703891 | 6.923616 | -1.94005 |
| C | 4.810497 | 7.600063 | -1.19998 | H | 5.793058 | 5.941532 | 2.143363 |
| C | 6.0372   | 6.955413 | -1.08318 | H | 3.644732 | 7.092585 | 1.942766 |
| C | 6.399112 | 6.291432 | 0.102858 | H | 2.117997 | 8.909341 | 1.563012 |
| C | 5.550208 | 6.443864 | 1.212249 | H | -0.32872 | 8.83405  | 1.409323 |
| C | 4.327836 | 7.096467 | 1.098687 | H | -0.01647 | 6.891941 | -2.41412 |
| C | 3.896955 | 7.61859  | -0.13186 | H | 2.414409 | 7.003738 | -2.27394 |
| C | 2.461731 | 7.92508  | -0.32662 | H | 8.474748 | 2.65089  | -1.79263 |
| C | 1.652879 | 8.473688 | 0.682959 | H | 7.209764 | 4.731906 | -1.93439 |
| C | 0.264548 | 8.425397 | 0.596641 | H | 8.027663 | 5.518712 | 2.210396 |
| C | -0.3778  | 7.811627 | -0.49447 | H | 9.290323 | 3.418903 | 2.354691 |
| C | 0.434733 | 7.383578 | -1.55877 | H | -4.17604 | 6.089583 | -2.51871 |
| C | 1.819754 | 7.444328 | -1.47965 | H | -2.11289 | 7.392268 | -2.59838 |
| C | 8.421683 | 3.294666 | -0.92029 | H | -1.9173  | 7.334399 | 1.695557 |
| C | 7.702077 | 4.479912 | -1.00062 | H | -4.04677 | 6.148795 | 1.776244 |
| C | 7.47279  | 5.271583 | 0.137486 | H | 2.414393 | -7.00374 | -2.27394 |
| C | 8.12299  | 4.894789 | 1.326298 | H | -0.01648 | -6.89194 | -2.41412 |
| C | 8.840377 | 3.705066 | 1.408129 | H | -0.32875 | -8.83404 | 1.409321 |
| C | 8.943518 | 2.842056 | 0.30307  | H | 2.117969 | -8.90934 | 1.563015 |
| C | -3.7106  | 6.394556 | -1.58642 | H | 3.644708 | -7.09259 | 1.942769 |
| C | -2.52188 | 7.114658 | -1.63172 | H | 5.793038 | -5.94154 | 2.143367 |
| C | -1.80434 | 7.412891 | -0.45982 | H | 6.703875 | -6.92364 | -1.94005 |
| C | -2.42447 | 7.104953 | 0.763833 | H | 4.534766 | -8.05671 | -2.14646 |
| C | -3.62445 | 6.406155 | 0.809706 | H | -4.04679 | -6.14879 | 1.776234 |
| C | -4.2527  | 5.957904 | -0.36522 | H | -1.91733 | -7.33439 | 1.695552 |
| C | 1.819735 | -7.44433 | -1.47965 | H | -2.11291 | -7.39226 | -2.59838 |
| C | 0.434714 | -7.38358 | -1.55878 | H | -4.17605 | -6.08957 | -2.51871 |
| C | -0.37782 | -7.81162 | -0.49447 | H | 9.290311 | -3.41892 | 2.354696 |
| C | 0.264523 | -8.42539 | 0.59664  | H | 8.027644 | -5.51873 | 2.210402 |
| C | 1.652853 | -8.47369 | 0.68296  | H | 7.209755 | -4.73193 | -1.93439 |
| C | 2.461709 | -7.92508 | -0.32662 | H | 8.474744 | -2.65091 | -1.79263 |
| C | 3.896933 | -7.6186  | -0.13186 | H | 8.512188 | 1.222345 | 2.411835 |
| C | 4.327814 | -7.09647 | 1.098691 | H | 8.512185 | -1.22236 | 2.411836 |
| C | 5.550188 | -6.44387 | 1.212253 | H | 10.26981 | -1.22804 | -1.50826 |
| C | 6.399094 | -6.29145 | 0.102863 | H | 10.26982 | 1.228009 | -1.50826 |
| C | 6.037181 | -6.95543 | -1.08317 | H | -5.68041 | 0.00001  | 0.179953 |
| C | 4.810478 | -7.60007 | -1.19998 | H | -9.39775 | 1.347546 | -1.64463 |
| C | -3.62447 | -6.40614 | 0.809698 | H | -9.39775 | -1.34751 | -1.64463 |
| C | -2.42449 | -7.10495 | 0.763826 | H | -8.59775 | 2.184062 | 2.414737 |
| C | -1.80436 | -7.41288 | -0.45983 | H | -7.19728 | -0.00017 | 3.16181  |

|   |          |          |          |   |          |          |          |
|---|----------|----------|----------|---|----------|----------|----------|
| C | -2.5219  | -7.11465 | -1.63173 | H | -8.59799 | -2.18418 | 2.414555 |
| C | -3.71062 | -6.39454 | -1.58643 | H | -10.8834 | -1.35056 | 1.249921 |
| C | -4.25272 | -5.95789 | -0.36523 | H | -10.8833 | 1.350796 | 1.250032 |
| C | 8.840365 | -3.70509 | 1.408134 |   |          |          |          |

**Fe-[12]CPP**

|   |          |          |          |   |          |          |          |
|---|----------|----------|----------|---|----------|----------|----------|
| C | 9.402897 | 0.642988 | -1.14545 | C | 1.292493 | -8.18044 | -0.68841 |
| C | 7.499773 | -0.06776 | -0.07394 | C | 0.725514 | -8.92299 | 0.364518 |
| C | 8.191725 | -1.23963 | -0.51814 | C | -0.6491  | -9.12811 | 0.447743 |
| C | 9.381529 | -0.78547 | -1.17817 | C | -1.52196 | -8.61487 | -0.52751 |
| C | 9.862082 | -1.31541 | 2.349973 | C | -0.94236 | -7.99447 | -1.64714 |
| C | 9.143447 | -0.16766 | 2.803405 | C | 0.428341 | -7.77736 | -1.72224 |
| C | 9.875416 | 0.99439  | 2.412158 | C | -5.67346 | -7.60987 | -0.00401 |
| C | 11.0466  | 0.564676 | 1.718889 | C | -4.78898 | -7.67126 | 1.08758  |
| C | 11.0384  | -0.86259 | 1.680567 | C | -3.48028 | -8.11546 | 0.934957 |
| C | -5.48289 | 7.714068 | -0.18721 | C | -2.98735 | -8.50962 | -0.32034 |
| C | -4.68578 | 7.807211 | 0.966563 | C | -3.90781 | -8.57876 | -1.38102 |
| C | -3.36315 | 8.235145 | 0.895625 | C | -5.22163 | -8.14666 | -1.22413 |
| C | -2.77792 | 8.58909  | -0.3322  | H | 10.1888  | 1.270721 | -1.54617 |
| C | -3.62176 | 8.643582 | -1.45642 | H | 6.533497 | -0.06535 | 0.411257 |
| C | -4.94341 | 8.216367 | -1.3855  | H | 10.14856 | -1.4177  | -1.60739 |
| C | -6.97004 | 6.017095 | -1.23161 | H | 9.555726 | -2.34662 | 2.469249 |
| C | -7.92241 | 5.012078 | -1.13016 | H | 8.204418 | -0.17654 | 3.34169  |
| C | -8.69018 | 4.842045 | 0.036094 | H | 9.580808 | 2.021189 | 2.586429 |
| C | -8.5379  | 5.811313 | 1.045522 | H | 11.80027 | 1.209046 | 1.285235 |
| C | -7.57487 | 6.813562 | 0.948743 | H | 11.7848  | -1.49138 | 1.21279  |
| C | -6.72523 | 6.902819 | -0.16827 | H | -5.06752 | 7.430007 | 1.911135 |
| C | 3.368491 | -7.25271 | -1.7989  | H | -2.74395 | 8.182475 | 1.786711 |
| C | 4.5156   | -6.46871 | -1.72386 | H | -3.22401 | 8.984604 | -2.40855 |
| C | 5.047512 | -6.06601 | -0.48583 | H | -5.55509 | 8.230831 | -2.28364 |
| C | 4.447878 | -6.60081 | 0.668361 | H | -6.32871 | 6.044828 | -2.10743 |
| C | 3.290525 | -7.36708 | 0.593785 | H | -7.99164 | 4.282936 | -1.93083 |
| C | 2.681584 | -7.65843 | -0.64033 | H | -9.15648 | 5.762435 | 1.937547 |
| C | 6.995608 | -4.72396 | -1.41857 | H | -7.45998 | 7.518691 | 1.768017 |
| C | 7.754099 | -3.55316 | -1.42497 | H | 2.97136  | -7.50644 | -2.77759 |
| C | 7.615768 | -2.59421 | -0.40876 | H | 4.956954 | -6.09692 | -2.64414 |
| C | 6.759691 | -2.90501 | 0.661602 | H | 4.86167  | -6.3697  | 1.645715 |
| C | 5.995662 | -4.06274 | 0.660317 | H | 2.808521 | -7.6739  | 1.517145 |
| C | 2.892708 | 7.651416 | -0.42859 | H | 7.11025  | -5.42953 | -2.23712 |
| C | 3.618497 | 7.29449  | -1.57947 | H | 8.41845  | -3.35353 | -2.26169 |
| C | 4.748484 | 6.48712  | -1.50143 | H | 6.65611  | -2.20087 | 1.482238 |
| C | 4.590165 | 6.499016 | 0.890259 | H | 5.283155 | -4.21987 | 1.464047 |
| C | 3.448934 | 7.289532 | 0.811445 | H | 3.263273 | 7.60509  | -2.55787 |
| C | -1.30132 | 8.665413 | -0.45721 | H | 5.218459 | 6.154458 | -2.42242 |
| C | -0.46398 | 9.136534 | 0.569419 | H | 4.961582 | 6.210988 | 1.869524 |
| C | 0.910147 | 8.909678 | 0.541269 | H | 2.935693 | 7.558909 | 1.729863 |
| C | 1.512308 | 8.191288 | -0.50867 | H | -0.89723 | 9.663034 | 1.415983 |

|   |          |          |          |    |          |          |          |
|---|----------|----------|----------|----|----------|----------|----------|
| C | 0.687402 | 7.826616 | -1.58756 | H  | 1.519602 | 9.270526 | 1.365341 |
| C | -0.68131 | 8.060987 | -1.5644  | H  | 1.103116 | 7.25752  | -2.41306 |
| C | 6.059126 | -4.98321 | -0.40251 | H  | -1.29413 | 7.671536 | -2.3719  |
| C | 6.207709 | 4.901015 | -0.2055  | H  | 7.319652 | 5.405972 | -1.98863 |
| C | 7.16296  | 4.664532 | -1.20978 | H  | 8.56338  | 3.294519 | -2.08907 |
| C | 7.885274 | 3.472313 | -1.2585  | H  | 6.676333 | 2.012683 | 1.55113  |
| C | 7.691973 | 2.467587 | -0.29694 | H  | 5.36502  | 4.070125 | 1.60258  |
| C | 6.821394 | 2.752517 | 0.769097 | H  | -9.27553 | 3.571978 | 2.387935 |
| C | 6.092286 | 3.931984 | 0.808651 | H  | -9.973   | 1.260583 | 2.678467 |
| C | 5.224068 | 6.010853 | -0.26653 | H  | -10.4266 | 0.868018 | -1.58134 |
| C | 8.226461 | 1.102218 | -0.46479 | H  | -9.86496 | 3.216029 | -1.85714 |
| C | -9.44187 | 3.577021 | 0.232653 | H  | -11.3147 | -1.07345 | -1.10713 |
| C | -9.56433 | 3.001249 | 1.510276 | H  | -10.7247 | -3.44641 | -1.19515 |
| C | -9.93787 | 1.671462 | 1.673793 | H  | -8.47943 | -3.02155 | 2.443351 |
| C | -10.1824 | 0.837578 | 0.56716  | H  | -9.02394 | -0.65293 | 2.511496 |
| C | -10.2152 | 1.45844  | -0.69509 | H  | -8.95177 | -5.3937  | 2.452767 |
| C | -9.86798 | 2.794761 | -0.85612 | H  | -7.31746 | -7.20019 | 2.189543 |
| C | -10.1733 | -0.64335 | 0.680609 | H  | -6.88731 | -6.19139 | -1.96941 |
| C | -10.6842 | -1.48654 | -0.32478 | H  | -8.54205 | -4.41855 | -1.71187 |
| C | -10.3544 | -2.8386  | -0.37346 | H  | 1.363936 | -9.31752 | 1.150122 |
| C | -9.514   | -3.41797 | 0.593261 | H  | -1.05531 | -9.66866 | 1.298865 |
| C | -9.132   | -2.61106 | 1.678191 | H  | -1.58512 | -7.57832 | -2.41761 |
| C | -9.44701 | -1.25847 | 1.716587 | H  | 0.816717 | -7.19233 | -2.55    |
| C | -8.84104 | -4.72642 | 0.401712 | H  | -5.09149 | -7.26271 | 2.046922 |
| C | -8.50597 | -5.56835 | 1.476912 | H  | -2.7982  | -8.04704 | 1.777697 |
| C | -7.57363 | -6.59082 | 1.327245 | H  | -3.57981 | -8.94212 | -2.35152 |
| C | -6.91988 | -6.80947 | 0.100024 | H  | -5.89511 | -8.18918 | -2.07569 |
| C | -7.36504 | -6.0599  | -1.00334 | Fe | 9.359396 | -0.11394 | 0.762163 |
| C | -8.30687 | -5.04722 | -0.85769 |    |          |          |          |

**Fe-[8]CPP<sup>+</sup>**

|   |          |          |          |    |          |          |          |
|---|----------|----------|----------|----|----------|----------|----------|
| C | -1.35951 | 5.98347  | 0.070336 | C  | -6.81659 | 2.961945 | 0.994586 |
| C | 4.371091 | -2.6038  | 0.370589 | C  | -6.82175 | 2.784145 | -1.39034 |
| C | 2.66056  | 4.565548 | 0.322165 | C  | -5.0195  | 5.350341 | 0.798566 |
| C | 2.791338 | -3.89044 | -0.95692 | C  | -7.01599 | -1.22933 | 1.214926 |
| C | 4.536195 | -0.09065 | -0.02191 | C  | -7.3427  | 1.499085 | -1.29266 |
| C | 3.03097  | 3.835767 | -0.82774 | C  | -7.74307 | -1.45355 | -1.05654 |
| C | 4.508121 | 2.411847 | 0.475615 | C  | -7.3683  | 1.689424 | 1.090919 |
| C | 5.050595 | 1.059905 | 0.666647 | C  | -7.26076 | -2.75947 | -1.08217 |
| C | -0.46457 | 6.228259 | -0.99129 | Fe | 6.648954 | -0.06434 | -0.18627 |
| C | 4.956717 | -1.29059 | 0.63241  | H  | 2.233708 | -4.00142 | -1.88099 |
| C | 1.40574  | 5.351928 | 0.302575 | H  | 3.799499 | -0.04798 | -0.81164 |
| C | 0.884848 | 5.912356 | -0.88081 | H  | 2.522826 | 4.026143 | -1.76732 |
| C | 3.924899 | 2.779097 | -0.75236 | H  | -0.84302 | 6.609418 | -1.93546 |
| C | -2.81754 | 5.814733 | -0.14133 | H  | 1.532188 | 6.058768 | -1.74148 |
| C | -3.95512 | -5.8497  | 0.992617 | H  | 4.113746 | 2.183591 | -1.64226 |
| C | 4.180663 | -3.51957 | 1.425587 | H  | -3.64835 | -6.38817 | 1.88525  |



|   |          |          |          |   |          |          |          |
|---|----------|----------|----------|---|----------|----------|----------|
| C | 3.714446 | -2.86413 | -0.85037 | H | 4.694943 | -3.37202 | 2.371353 |
| C | 7.276384 | 0.030051 | -2.22403 | H | 3.878389 | -2.21188 | -1.7041  |
| C | -0.79841 | 5.614498 | 1.306902 | H | 6.596452 | 0.036844 | -3.06619 |
| C | 5.89965  | -0.882   | 1.633039 | H | -1.44978 | 5.433773 | 2.1563   |
| C | 1.176445 | -5.43361 | 0.148714 | H | 6.467433 | -1.54492 | 2.273836 |
| C | -1.61783 | -5.97037 | 0.016721 | H | 3.184641 | 4.897401 | 2.394652 |
| C | 3.383026 | 4.308194 | 1.504581 | H | -2.5573  | 5.079261 | -2.15604 |
| C | -3.08048 | -5.76127 | -0.10889 | H | 7.708066 | -2.14999 | -1.95206 |
| C | -3.25084 | 5.199571 | -1.32928 | H | 7.454365 | 2.205487 | -1.69501 |
| C | 7.878058 | -1.12504 | -1.64711 | H | 6.539018 | 1.138716 | 2.355484 |
| C | 7.727384 | 1.17695  | -1.4985  | H | -4.71551 | 4.00177  | -2.29741 |
| C | 5.945662 | 0.547274 | 1.669678 | H | 4.73974  | 3.014923 | 2.542411 |
| C | -4.49162 | 4.581503 | -1.40883 | H | 9.246442 | -1.35254 | 0.103694 |
| C | -5.37068 | 4.55076  | -0.30924 | H | 1.181027 | -6.01734 | -1.93815 |
| C | 2.453479 | -4.68914 | 0.158109 | H | -1.58532 | -5.5365  | 2.13326  |
| C | 4.28325  | 3.249169 | 1.584367 | H | 0.794922 | -5.08251 | 2.249715 |
| C | 8.68376  | -0.70467 | -0.55627 | H | 0.911257 | 4.888992 | 2.357398 |
| C | 0.580719 | -5.90449 | -1.03918 | H | 3.069155 | -5.18802 | 2.172007 |
| C | -0.98468 | -5.68829 | 1.242478 | H | -1.21138 | -6.49951 | -2.04345 |
| C | 0.378162 | -5.42796 | 1.308475 | H | -3.51069 | 6.50218  | 1.790379 |
| C | 0.551806 | 5.303734 | 1.420437 | H | -5.80095 | -5.22686 | 1.882568 |
| C | 3.242679 | -4.54031 | 1.318253 | H | -2.95609 | -5.0858  | -2.1597  |
| C | -0.78034 | -6.17934 | -1.09947 | H | 9.098681 | 1.33745  | 0.271213 |
| C | -3.76936 | 5.956818 | 0.886412 | H | -5.0984  | -3.93902 | -2.15945 |
| C | -5.18106 | -5.19235 | 0.990889 | H | -6.03497 | -2.91758 | 2.073792 |
| C | -3.58572 | -5.16398 | -1.2787  | H | -6.59038 | 3.492903 | 1.913898 |
| C | -5.58658 | -4.41212 | -0.11045 | H | -6.64163 | 3.193698 | -2.37956 |
| C | 8.595582 | 0.718076 | -0.4599  | H | -5.70302 | 5.445758 | 1.637031 |
| C | -6.41753 | 3.497831 | -0.24529 | H | -6.84884 | -0.64349 | 2.111984 |
| C | -6.55793 | -3.29702 | 0.012999 | H | -7.50462 | 0.941634 | -2.20966 |
| C | -4.81117 | -4.50757 | -1.28023 | H | -8.22882 | -1.06288 | -1.94584 |
| C | -6.54771 | -2.53664 | 1.195771 | H | -7.59169 | 1.298686 | 2.07873  |
| C | -7.51772 | 0.869286 | -0.04467 | H | -7.3765  | -3.34645 | -1.98965 |
| C | -7.52754 | -0.61414 | 0.056365 |   |          |          |          |

#### Fc-[11]CPP+

|   |          |          |          |   |          |          |          |
|---|----------|----------|----------|---|----------|----------|----------|
| C | 0.218682 | 8.390047 | 0.660342 | C | -6.86867 | 2.449423 | -0.36611 |
| C | 0.385571 | 7.379765 | -1.51082 | C | -6.96206 | 3.41792  | -1.38082 |
| C | 0.446868 | -8.40247 | 0.683845 | C | -7.29366 | -1.2685  | -0.57973 |
| C | 0.57683  | -7.42194 | -1.50469 | C | -7.37933 | 1.084318 | -0.55738 |
| C | 1.606893 | 8.456811 | 0.735388 | C | -8.36949 | -0.83694 | -1.41998 |
| C | 1.770444 | 7.455258 | -1.44007 | C | -8.41136 | 0.591744 | -1.42394 |
| C | 1.835895 | -8.43787 | 0.749818 | C | -9.06393 | -0.36516 | 2.522042 |
| C | 1.96332  | -7.46379 | -1.44133 | C | -9.39845 | 0.986711 | 2.192553 |
| C | 2.417884 | 7.926459 | -0.28466 | C | -9.95496 | -1.22162 | 1.805143 |
| C | 2.628575 | -7.90115 | -0.28217 | C | -10.4886 | 0.95741  | 1.279657 |
| C | 3.862543 | 7.643086 | -0.10545 | C | -10.8264 | -0.40215 | 1.036855 |

|   |          |          |          |    |          |          |          |
|---|----------|----------|----------|----|----------|----------|----------|
| C | 4.065311 | -7.57956 | -0.11083 | Fe | -8.77959 | -0.06842 | 0.494623 |
| C | 4.318075 | 7.128461 | 1.120344 | H  | 0.113455 | -6.96478 | -2.37315 |
| C | 4.513632 | -7.05766 | 1.114941 | H  | 2.070217 | 8.895201 | 1.6151   |
| C | 4.766977 | 7.641178 | -1.18274 | H  | 2.314516 | -8.85493 | 1.631554 |
| C | 4.964084 | -7.54912 | -1.19283 | H  | 2.361789 | 7.036749 | -2.24881 |
| C | 5.55291  | 6.496329 | 1.219928 | H  | 2.5395   | -7.04338 | -2.25985 |
| C | 5.7315   | -6.39367 | 1.210984 | H  | 3.649653 | 7.115303 | 1.976624 |
| C | 6.006775 | 7.019048 | -1.07879 | H  | 3.849992 | -7.06493 | 1.9749   |
| C | 6.187409 | -6.89516 | -1.09227 | H  | 4.479574 | 8.09824  | -2.12604 |
| C | 6.393348 | 6.355662 | 0.101355 | H  | 4.68519  | -8.0108  | -2.1364  |
| C | 6.562437 | -6.22611 | 0.088797 | H  | 5.814322 | 6.003741 | 2.151563 |
| C | 7.488759 | 5.354409 | 0.123603 | H  | 5.984374 | -5.89823 | 2.143367 |
| C | 7.631708 | -5.1976  | 0.110863 | H  | 6.665474 | 7.006993 | -1.94261 |
| C | 7.728144 | 4.572443 | -1.02009 | H  | 6.841485 | -6.86299 | -1.95901 |
| C | 7.849196 | -4.40704 | -1.03142 | H  | 7.232134 | 4.820768 | -1.95342 |
| C | 8.156501 | 4.982515 | 1.305393 | H  | 7.359183 | -4.66614 | -1.965   |
| C | 8.290871 | -4.81103 | 1.292924 | H  | 8.063013 | 5.600925 | 2.194068 |
| C | 8.468273 | 3.398581 | -0.95022 | H  | 8.215398 | -5.43399 | 2.180116 |
| C | 8.557626 | -3.21394 | -0.95928 | H  | 8.529492 | 2.765347 | -1.83016 |
| C | 8.895662 | 3.804956 | 1.376218 | H  | 8.601098 | -2.5771  | -1.83763 |
| C | 8.998581 | -3.61465 | 1.365762 | H  | 8.640794 | 1.30858  | 2.386793 |
| C | 9.003994 | 2.94491  | 0.267756 | H  | 8.674613 | -1.12987 | 2.383221 |
| C | 9.06003  | 0.791531 | 1.528676 | H  | 9.360824 | 3.528042 | 2.318531 |
| C | 9.07932  | -0.5989  | 1.526606 | H  | 9.457659 | -3.32783 | 2.308046 |
| C | 9.081897 | -2.74882 | 0.259468 | H  | -0.06109 | 6.898678 | -2.37505 |
| C | 9.424324 | 1.526793 | 0.387238 | H  | -0.12701 | -8.80277 | 1.514923 |
| C | 9.463649 | -1.32031 | 0.382872 | H  | -0.36939 | 8.788663 | 1.482297 |
| C | 9.966066 | 0.807754 | -0.69449 | H  | -1.7487  | -7.34922 | 1.79028  |
| C | 9.984896 | -0.58344 | -0.69684 | H  | -1.98145 | 7.324495 | 1.762396 |
| C | -0.21817 | -7.82505 | -0.41568 | H  | -1.99149 | -7.44875 | -2.50475 |
| C | -0.42594 | 7.782881 | -0.43463 | H  | 10.33465 | 1.343706 | -1.56499 |
| C | -1.6463  | -7.43461 | -0.36877 | H  | 10.36778 | -1.10632 | -1.56915 |
| C | -1.84898 | 7.367275 | -0.3958  | H  | -2.16391 | 7.328613 | -2.53575 |
| C | -2.262   | -7.1257  | 0.86074  | H  | -3.87653 | -6.1824  | 1.886911 |
| C | -2.38715 | -7.16154 | -1.53567 | H  | -4.06483 | -6.18199 | -2.41833 |
| C | -2.47713 | 7.073661 | 0.830126 | H  | -4.09378 | 6.129857 | 1.853668 |
| C | -2.56769 | 7.055556 | -1.5659  | H  | -4.21165 | 6.02341  | -2.45127 |
| C | -3.46404 | -6.43517 | 0.914542 | H  | -4.46941 | -4.13336 | 1.645575 |
| C | -3.58519 | -6.4596  | -1.4844  | H  | -4.67932 | 4.076589 | 1.663705 |
| C | -3.67103 | 6.366601 | 0.881576 | H  | -5.83603 | -2.13262 | 1.543127 |
| C | -3.7531  | 6.331479 | -1.51631 | H  | -5.91265 | -0.05495 | 0.682004 |
| C | -4.11675 | -6.01117 | -0.25962 | H  | -6.01261 | 2.050675 | 1.584163 |
| C | -4.29762 | 5.903916 | -0.29095 | H  | -6.168   | -5.50264 | -2.06766 |
| C | -5.15454 | -4.01384 | 0.813799 | H  | -6.28902 | 5.301419 | -2.13597 |
| C | -5.16213 | -4.96865 | -0.22672 | H  | -7.50237 | -3.46216 | -2.20859 |
| C | -5.32972 | 4.843593 | -0.25144 | H  | -7.56921 | 3.225025 | -2.26129 |
| C | -5.33731 | 3.921377 | 0.815892 | H  | -8.29117 | -0.68137 | 3.210221 |
| C | -5.92023 | -2.86474 | 0.745069 | H  | -8.90521 | 1.876766 | 2.561054 |
| C | -6.08516 | 2.757179 | 0.761337 | H  | -9.03635 | -1.48449 | -1.97515 |

|   |          |          |          |   |          |          |          |
|---|----------|----------|----------|---|----------|----------|----------|
| C | -6.08551 | -4.76627 | -1.27447 | H | -9.10533 | 1.195019 | -1.99541 |
| C | -6.21595 | 4.591695 | -1.3179  | H | -9.95521 | -2.30385 | 1.826926 |
| C | -6.75006 | -2.608   | -0.36495 | H | -10.954  | 1.819062 | 0.818346 |
| C | -6.76143 | -0.08014 | 0.014221 | H | -11.5956 | -0.7525  | 0.360357 |
| C | -6.85972 | -3.61374 | -1.34561 |   |          |          |          |

*m*[6]CPP

|   |          |          |          |   |          |          |          |
|---|----------|----------|----------|---|----------|----------|----------|
| C | -0.05182 | -4.19649 | 1.420428 | C | -0.05463 | -0.8213  | 3.895904 |
| C | 1.152168 | -4.11561 | 0.694961 | C | -1.27168 | -1.35341 | 3.43222  |
| C | 1.152168 | -4.11561 | -0.69496 | C | -1.32437 | -2.60556 | 2.830636 |
| C | -0.05182 | -4.19649 | -1.42043 | C | -0.16226 | -3.38294 | 2.663569 |
| C | -1.18067 | -4.63608 | -0.69622 | C | 0.962992 | -2.98639 | 3.416784 |
| C | -1.18067 | -4.63608 | 0.696223 | C | 1.016654 | -1.73047 | 4.016356 |
| C | -0.16226 | -3.38294 | -2.66357 | H | 2.07006  | -3.8381  | 1.20357  |
| C | 0.962992 | -2.98639 | -3.41678 | H | 2.07006  | -3.8381  | -1.20357 |
| C | 1.016654 | -1.73047 | -4.01636 | H | -2.10986 | -4.85129 | -1.21782 |
| C | -0.05463 | -0.8213  | -3.8959  | H | -2.10986 | -4.85129 | 1.217819 |
| C | -1.27168 | -1.35341 | -3.43222 | H | 1.85314  | -3.6102  | -3.43127 |
| C | -1.32437 | -2.60556 | -2.83064 | H | 1.945617 | -1.41255 | -4.48308 |
| C | 0.143358 | 0.65232  | -3.80451 | H | -2.14567 | -0.71348 | -3.35963 |
| C | -0.91936 | 1.573665 | -3.87537 | H | -2.23638 | -2.88374 | -2.31208 |
| C | -0.86717 | 2.787064 | -3.18741 | H | -1.84424 | 1.293704 | -4.37308 |
| C | 0.25454  | 3.128873 | -2.41281 | H | -1.75729 | 3.409976 | -3.14451 |
| C | 1.39893  | 2.326621 | -2.55515 | H | 2.306458 | 2.595198 | -2.02071 |
| C | 1.346149 | 1.116832 | -3.23771 | H | 2.207291 | 0.457272 | -3.19216 |
| C | -0.39263 | 5.336261 | -1.22089 | H | -0.62444 | 5.842532 | -2.15448 |
| C | -0.62935 | 5.977421 | 0        | H | -1.02664 | 6.989314 | 0        |
| C | -0.39263 | 5.336261 | 1.220887 | H | -0.62444 | 5.842532 | 2.154476 |
| C | 0.134392 | 4.037127 | 1.234333 | H | 0.756897 | 2.403375 | 0        |
| C | 0.416886 | 3.432983 | 0        | H | 2.306458 | 2.595198 | 2.020713 |
| C | 0.134392 | 4.037127 | -1.23433 | H | 2.207291 | 0.457272 | 3.192155 |
| C | 0.25454  | 3.128873 | 2.412811 | H | -1.84424 | 1.293704 | 4.373081 |
| C | 1.39893  | 2.326621 | 2.555151 | H | -1.75729 | 3.409976 | 3.14451  |
| C | 1.346149 | 1.116832 | 3.237707 | H | -2.14567 | -0.71348 | 3.359632 |
| C | 0.143358 | 0.65232  | 3.80451  | H | -2.23638 | -2.88374 | 2.312078 |
| C | -0.91936 | 1.573665 | 3.875368 | H | 1.85314  | -3.6102  | 3.431273 |
| C | -0.86717 | 2.787064 | 3.18741  | H | 1.945617 | -1.41255 | 4.483078 |

*m*[7]CPP

|   |          |          |             |   |          |          |          |
|---|----------|----------|-------------|---|----------|----------|----------|
| C | 5.121097 | 0.777026 | 0.06504000  | C | 0.62564  | -4.78219 | 1.07987  |
| C | 5.162271 | 1.613937 | -1.07058500 | C | 5.15556  | -0.70811 | -0.03363 |
| C | 4.483248 | 2.829227 | -1.09620000 | C | 5.007873 | -1.52796 | 1.103695 |
| C | 3.73881  | 3.270551 | 0.01613200  | C | 4.337997 | -2.74399 | 1.031081 |
| C | 3.96039  | 2.582935 | 1.22327000  | C | 3.810538 | -3.22154 | -0.18602 |
| C | 4.634302 | 1.369002 | 1.24681000  | C | 4.277481 | -2.56999 | -1.34554 |
| C | 2.502222 | 4.087096 | -0.10672200 | C | 4.917516 | -1.33842 | -1.27136 |
| C | 1.723599 | 3.944007 | -1.27020100 | H | 5.63372  | 1.267475 | -1.98598 |
| C | 0.3473   | 4.1411   | -1.24540100 | H | 4.445981 | 3.387924 | -2.02793 |
| C | -0.31576 | 4.488942 | -0.05531600 | H | 3.448733 | 2.902389 | 2.125807 |
| C | 0.493678 | 4.877143 | 1.02992600  | H | 4.618502 | 0.803267 | 2.171875 |
| C | 1.872573 | 4.685601 | 1.00319700  | H | 2.165998 | 3.508622 | -2.16089 |
| C | -1.74101 | 4.093733 | 0.10391500  | H | -0.23307 | 3.857592 | -2.1184  |
| C | -2.65226 | 4.054189 | -0.96711400 | H | 0.030767 | 5.251215 | 1.939657 |
| C | -3.77703 | 3.229201 | -0.92581400 | H | 2.451816 | 4.91521  | 1.893836 |
| C | -4.03259 | 2.412481 | 0.18834600  | H | -2.43463 | 4.604266 | -1.87907 |
| C | -3.23164 | 2.603228 | 1.32607900  | H | -4.39966 | 3.134388 | -1.81199 |
| C | -2.1136  | 3.428141 | 1.28672000  | H | -3.43502 | 2.023566 | 2.222635 |
| C | -6.20166 | 1.162641 | -0.41993300 | H | -1.4487  | 3.451499 | 2.14497  |
| C | -6.83499 | -0.06758 | -0.62193300 | H | -6.72188 | 2.08764  | -0.65508 |
| C | -6.17629 | -1.27414 | -0.36742900 | H | -7.8542  | -0.08637 | -0.99947 |
| C | -4.8666  | -1.26385 | 0.13447300  | H | -6.67763 | -2.21885 | -0.56184 |
| C | -4.26546 | -0.01956 | 0.37565200  | H | -3.23001 | -0.00086 | 0.698464 |
| C | -4.89343 | 1.20007  | 0.08321100  | H | -4.41002 | -3.29902 | -1.65974 |
| C | -3.98148 | -2.45351 | 0.27926500  | H | -2.42774 | -4.74345 | -1.71356 |
| C | -3.75403 | -3.33212 | -0.79343300 | H | -1.3107  | -3.33865 | 2.194917 |
| C | -2.61891 | -4.14235 | -0.82831000 | H | -3.31713 | -1.9407  | 2.265235 |
| C | -1.66647 | -4.10435 | 0.20684500  | H | -0.26236 | -4.02265 | -2.09682 |
| C | -2.00658 | -3.37582 | 1.36215500  | H | 2.109438 | -3.65745 | -2.28754 |
| C | -3.1365  | -2.56707 | 1.39565600  | H | 2.612052 | -4.73185 | 1.852791 |
| C | -0.24336 | -4.48759 | 0.01199100  | H | 0.216276 | -5.09324 | 2.037683 |
| C | 0.360115 | -4.22331 | -1.22992600 | H | 5.294385 | -1.15952 | 2.084076 |
| C | 1.728789 | -4.00959 | -1.33529000 | H | 4.105505 | -3.24986 | 1.962773 |
| C | 2.569927 | -4.04623 | -0.20574400 | H | 4.021785 | -2.95119 | -2.32905 |
| C | 1.997996 | -4.57441 | 0.97102400  | H | 5.092021 | -0.80087 | -2.19804 |

*m*[8]CPP

|   |          |          |             |   |          |          |          |
|---|----------|----------|-------------|---|----------|----------|----------|
| C | -0.14848 | -5.06063 | 2.76022300  | C | 1.172083 | -5.46741 | -0.69543 |
| C | -1.32631 | -4.34004 | 3.02783300  | C | 1.172083 | -5.46741 | 0.695429 |
| C | -1.33857 | -3.28792 | 3.93394200  | C | -0.17653 | -2.90203 | -4.62787 |
| C | -0.17653 | -2.90203 | 4.62787300  | C | -1.33857 | -3.28792 | -3.93394 |
| C | 0.921457 | -3.7828  | 4.54154500  | C | -1.32631 | -4.34004 | -3.02783 |
| C | 0.938347 | -4.83228 | 3.62589400  | C | -0.14848 | -5.06063 | -2.76022 |
| C | -0.04994 | -1.50003 | 5.10983900  | C | 0.938347 | -4.83228 | -3.62589 |
| C | -1.16871 | -0.65412 | 5.23972000  | C | 0.921457 | -3.7828  | -4.54155 |
| C | -1.04727 | 0.727618 | 5.13498300  | H | -2.20112 | -4.49385 | 2.403633 |
| C | 0.20294  | 1.340965 | 4.93132900  | H | -2.22827 | -2.66926 | 3.978833 |
| C | 1.332426 | 0.512343 | 5.06934600  | H | 1.812594 | -3.59918 | 5.135188 |
| C | 1.209487 | -0.87051 | 5.14086900  | H | 1.84206  | -5.42829 | 3.525985 |
| C | 0.295118 | 2.689212 | 4.31134500  | H | -2.16499 | -1.07827 | 5.319846 |
| C | -0.74827 | 3.633589 | 4.35047100  | H | -1.95438 | 1.323132 | 5.092703 |
| C | -0.80975 | 4.685847 | 3.43562800  | H | 2.328606 | 0.942463 | 5.023457 |
| C | 0.175788 | 4.845485 | 2.44743300  | H | 2.114941 | -1.46777 | 5.09997  |
| C | 1.301198 | 4.008135 | 2.52386100  | H | -1.56419 | 3.508501 | 5.057111 |
| C | 1.357692 | 2.956405 | 3.42717800  | H | -1.68272 | 5.333792 | 3.431308 |
| C | -0.56524 | 6.976951 | 1.21860600  | H | 2.111607 | 4.140099 | 1.812405 |
| C | -0.81706 | 7.61386  | 0.00000000  | H | 2.196039 | 2.270476 | 3.367775 |
| C | -0.56524 | 6.976951 | -1.21860600 | H | -0.77767 | 7.489243 | 2.15346  |
| C | -0.03117 | 5.679746 | -1.23295700 | H | -1.21904 | 8.623824 | 0        |
| C | 0.233462 | 5.066103 | 0.00000000  | H | -0.77767 | 7.489243 | -2.15346 |
| C | -0.03117 | 5.679746 | 1.23295700  | H | 0.573838 | 4.036599 | 0        |
| C | 0.175788 | 4.845485 | -2.44743300 | H | -1.68272 | 5.333792 | -3.43131 |
| C | -0.80975 | 4.685847 | -3.43562800 | H | -1.56419 | 3.508501 | -5.05711 |
| C | -0.74827 | 3.633589 | -4.35047100 | H | 2.196039 | 2.270476 | -3.36778 |
| C | 0.295118 | 2.689212 | -4.31134500 | H | 2.111607 | 4.140099 | -1.81241 |
| C | 1.357692 | 2.956405 | -3.42717800 | H | -1.95438 | 1.323132 | -5.0927  |
| C | 1.301198 | 4.008135 | -2.52386100 | H | -2.16499 | -1.07827 | -5.31985 |
| C | 0.20294  | 1.340965 | -4.93132900 | H | 2.114941 | -1.46777 | -5.09997 |
| C | -1.04727 | 0.727618 | -5.13498300 | H | 2.328606 | 0.942463 | -5.02346 |
| C | -1.16871 | -0.65412 | -5.23972000 | H | -2.02327 | -6.46504 | 1.223184 |
| C | -0.04994 | -1.50003 | -5.10983900 | H | -2.02327 | -6.46504 | -1.22318 |
| C | 1.209487 | -0.87051 | -5.14086900 | H | 2.060074 | -5.11815 | -1.21389 |
| C | 1.332426 | 0.512343 | -5.06935    | H | 2.060074 | -5.11815 | 1.213891 |
| C | -0.01138 | -5.69188 | 1.421778    | H | -2.22827 | -2.66926 | -3.97883 |
| C | -1.11758 | -6.17631 | 0.695923    | H | -2.20112 | -4.49385 | -2.40363 |
| C | -1.11758 | -6.17631 | -0.69592    | H | 1.84206  | -5.42829 | -3.52599 |
| C | -0.01138 | -5.69188 | -1.42178    | H | 1.812594 | -3.59918 | -5.13519 |

*m*[9]CPP

|   |          |          |          |   |          |          |          |
|---|----------|----------|----------|---|----------|----------|----------|
| C | 4.629061 | -4.30687 | -0.10012 | C | 4.280408 | 4.516046 | -0.30125 |
| C | 4.188601 | -5.14498 | 0.940728 | C | 3.878376 | 5.389121 | 0.728364 |
| C | 2.949631 | -5.77781 | 0.87982  | C | 2.602322 | 5.949459 | 0.745519 |
| C | 2.082851 | -5.58824 | -0.21519 | C | 6.564122 | 0.943089 | 0.122375 |
| C | 2.6174   | -4.917   | -1.33036 | C | 6.457319 | 1.569506 | -1.13492 |
| C | 3.860175 | -4.29807 | -1.27713 | C | 5.893149 | 2.832248 | -1.27126 |
| C | 0.613694 | -5.79768 | -0.1218  | C | 5.377106 | 3.524306 | -0.15945 |
| C | -0.02927 | -5.75061 | 1.129694 | C | 5.711657 | 3.00739  | 1.10608  |
| C | -1.39166 | -5.49758 | 1.237383 | C | 6.305814 | 1.756986 | 1.242759 |
| C | -2.1819  | -5.25062 | 0.100002 | H | 4.791925 | -5.24888 | 1.839134 |
| C | -1.57924 | -5.48925 | -1.14856 | H | 2.625464 | -6.37057 | 1.73059  |
| C | -0.22047 | -5.77016 | -1.25556 | H | 2.001763 | -4.752   | -2.20839 |
| C | -3.47839 | -4.53164 | 0.197127 | H | 4.168877 | -3.67406 | -2.11066 |
| C | -3.6657  | -3.61273 | 1.246476 | H | 0.557673 | -5.80595 | 2.041142 |
| C | -4.69606 | -2.68371 | 1.219883 | H | -1.82962 | -5.41176 | 2.227606 |
| C | -5.59059 | -2.61586 | 0.138946 | H | -2.15474 | -5.35086 | -2.05931 |
| C | -5.48925 | -3.6146  | -0.84372 | H | 0.208176 | -5.88448 | -2.24681 |
| C | -4.457   | -4.55327 | -0.81362 | H | -2.94101 | -3.56167 | 2.052492 |
| C | -7.78549 | -1.44682 | -0.47554 | H | -4.77698 | -1.95771 | 2.023966 |
| C | -8.48349 | -0.25117 | -0.66492 | H | -6.17763 | -3.60949 | -1.6851  |
| C | -7.88161 | 0.985582 | -0.41892 | H | -4.38345 | -5.27852 | -1.61961 |
| C | -6.55668 | 1.042159 | 0.039875 | H | -8.27268 | -2.39786 | -0.67447 |
| C | -5.87806 | -0.16909 | 0.237466 | H | -9.51433 | -0.28383 | -1.00825 |
| C | -6.4601  | -1.41949 | -0.016   | H | -8.44288 | 1.903259 | -0.57465 |
| C | -5.78101 | 2.29482  | 0.240163 | H | -4.83161 | -0.13495 | 0.520225 |
| C | -5.77719 | 3.34134  | -0.69693 | H | -6.48335 | 3.322952 | -1.52322 |
| C | -4.81345 | 4.349047 | -0.64755 | H | -4.81168 | 5.110904 | -1.42245 |
| C | -3.80695 | 4.35096  | 0.335862 | H | -3.16007 | 3.347132 | 2.137715 |
| C | -3.90644 | 3.381078 | 1.350745 | H | -4.88056 | 1.621097 | 2.080002 |
| C | -4.87032 | 2.383576 | 1.30626  | H | -2.63087 | 5.33266  | -1.92945 |
| C | -2.55591 | 5.144987 | 0.223168 | H | -0.29937 | 5.975371 | -2.195   |
| C | -2.02184 | 5.46155  | -1.03952 | H | 0.245369 | 5.749619 | 2.065024 |
| C | -0.68293 | 5.805292 | -1.19306 | H | -2.1179  | 5.237897 | 2.339373 |
| C | 0.197325 | 5.82385  | -0.09497 | H | 6.521943 | -3.24235 | -1.87059 |
| C | -0.38384 | 5.704048 | 1.18095  | H | 7.3848   | -0.96588 | -1.75495 |
| C | -1.72873 | 5.384898 | 1.335979 | H | 5.836925 | -0.60299 | 2.246653 |
| C | 5.620762 | -3.219   | 0.094754 | H | 5.017598 | -2.87358 | 2.137475 |
| C | 6.377881 | -2.67077 | -0.9571  | H | 1.45855  | 4.70671  | -2.19122 |
| C | 6.86467  | -1.36811 | -0.89044 | H | 3.66545  | 3.733942 | -2.2198  |
| C | 6.598491 | -0.54172 | 0.220755 | H | 4.54753  | 5.586157 | 1.561876 |
| C | 6.04332  | -1.1753  | 1.348795 | H | 2.313621 | 6.568455 | 1.590988 |
| C | 5.571521 | -2.48083 | 1.2898   | H | 6.702471 | 1.020158 | -2.0382  |
| C | 1.664393 | 5.666581 | -0.26643 | H | 5.758785 | 3.236689 | -2.27036 |
| C | 2.137535 | 4.951402 | -1.38105 | H | 5.388883 | 3.527273 | 2.003407 |
| C | 3.407267 | 4.392969 | -1.39775 | H | 6.465221 | 1.371067 | 2.244926 |

*m*[10]CPP

|   |          |          |          |   |          |          |          |
|---|----------|----------|----------|---|----------|----------|----------|
| C | 0.393403 | -3.58028 | 5.695284 | C | -1.50288 | -6.61248 | -0.69376 |
| C | -0.56283 | -3.02865 | 6.569129 | C | -0.42763 | -7.14473 | -1.42797 |
| C | -0.55563 | -1.67148 | 6.885941 | C | 0.546289 | -7.8522  | -0.69676 |
| C | 0.409191 | -0.79969 | 6.348302 | C | 0.546289 | -7.8522  | 0.696764 |
| C | 1.453689 | -1.38589 | 5.612047 | C | 0.205367 | -4.86902 | -4.98123 |
| C | 1.445284 | -2.7367  | 5.293931 | C | 1.279021 | -5.53171 | -4.35787 |
| C | 0.248307 | 0.67572  | 6.305946 | C | 1.067483 | -6.40725 | -3.29831 |
| C | -1.03192 | 1.244162 | 6.176768 | C | -0.22929 | -6.68325 | -2.82599 |
| C | -1.20013 | 2.552388 | 5.734941 | C | -1.29909 | -6.21231 | -3.6102  |
| C | -0.09734 | 3.352316 | 5.38541  | C | -1.08784 | -5.31689 | -4.65338 |
| C | 1.179496 | 2.840017 | 5.677915 | H | -1.3551  | -3.65677 | 6.967946 |
| C | 1.347499 | 1.536873 | 6.135134 | H | -1.34278 | -1.27618 | 7.523612 |
| C | -0.24901 | 4.561942 | 4.537152 | H | 2.219482 | -0.7549  | 5.172134 |
| C | -1.26764 | 4.589273 | 3.567208 | H | 2.203854 | -3.11053 | 4.614109 |
| C | -1.28125 | 5.544907 | 2.560232 | H | -1.91137 | 0.624263 | 6.325692 |
| C | -0.27449 | 6.520024 | 2.465906 | H | -2.20745 | 2.933639 | 5.592722 |
| C | 0.675732 | 6.568817 | 3.499406 | H | 2.060657 | 3.433648 | 5.451794 |
| C | 0.687539 | 5.610856 | 4.513305 | H | 2.354732 | 1.160714 | 6.291108 |
| C | 0.208253 | 8.694735 | 1.21632  | H | -2.01338 | 3.800641 | 3.550617 |
| C | 0.378429 | 9.360006 | 0        | H | -2.05923 | 5.507759 | 1.802876 |
| C | 0.208253 | 8.694735 | -1.21632 | H | 1.459816 | 7.321144 | 3.470119 |
| C | -0.15244 | 7.338625 | -1.23111 | H | 1.465457 | 5.654595 | 5.270981 |
| C | -0.33135 | 6.691238 | 0        | H | 0.344309 | 9.230309 | 2.152228 |
| C | -0.15244 | 7.338625 | 1.231108 | H | 0.644725 | 10.41386 | 0        |
| C | -0.27449 | 6.520024 | -2.46591 | H | 0.344309 | 9.230309 | -2.15223 |
| C | 0.675732 | 6.568817 | -3.49941 | H | -0.5397  | 5.626639 | 0        |
| C | 0.687539 | 5.610856 | -4.51331 | H | 1.459816 | 7.321144 | -3.47012 |
| C | -0.24901 | 4.561942 | -4.53715 | H | 1.465457 | 5.654595 | -5.27098 |
| C | -1.26764 | 4.589273 | -3.56721 | H | -2.01338 | 3.800641 | -3.55062 |
| C | -1.28125 | 5.544907 | -2.56023 | H | -2.05923 | 5.507759 | -1.80288 |
| C | -0.09734 | 3.352316 | -5.38541 | H | 2.060657 | 3.433648 | -5.45179 |
| C | 1.179496 | 2.840017 | -5.67792 | H | 2.354732 | 1.160714 | -6.29111 |
| C | 1.347499 | 1.536873 | -6.13513 | H | -1.91137 | 0.624263 | -6.32569 |
| C | 0.248307 | 0.67572  | -6.30595 | H | -2.20745 | 2.933639 | -5.59272 |
| C | -1.03192 | 1.244162 | -6.17677 | H | 2.29969  | -5.28824 | 4.638911 |
| C | -1.20013 | 2.552388 | -5.73494 | H | 1.929338 | -6.78424 | 2.755559 |
| C | 0.205367 | -4.86902 | 4.981232 | H | -2.3197  | -6.47002 | 3.341816 |
| C | 1.279021 | -5.53171 | 4.357869 | H | -1.951   | -4.87084 | 5.138844 |
| C | 1.067483 | -6.40725 | 3.298311 | H | 2.219482 | -0.7549  | -5.17213 |
| C | -0.22929 | -6.68325 | 2.825993 | H | 2.203854 | -3.11053 | -4.61411 |
| C | -1.29909 | -6.21231 | 3.610201 | H | -1.3551  | -3.65677 | -6.96795 |
| C | -1.08784 | -5.31689 | 4.653376 | H | -1.34278 | -1.27618 | -7.52361 |
| C | 0.409191 | -0.79969 | -6.3483  | H | -2.28389 | -6.06113 | 1.206893 |
| C | 1.453689 | -1.38589 | -5.61205 | H | -2.28389 | -6.06113 | -1.20689 |
| C | 1.445284 | -2.7367  | -5.29393 | H | 1.354024 | -8.35664 | -1.22063 |
| C | 0.393403 | -3.58028 | -5.69528 | H | 1.354024 | -8.35664 | 1.220629 |

|   |          |          |          |   |          |          |          |
|---|----------|----------|----------|---|----------|----------|----------|
| C | -0.56283 | -3.02865 | -6.56913 | H | 2.29969  | -5.28824 | -4.63891 |
| C | -0.5563  | -1.67148 | -6.88594 | H | 1.929338 | -6.78424 | -2.75556 |
| C | -0.42763 | -7.14473 | 1.427969 | H | -2.3197  | -6.47002 | -3.34182 |
| C | -1.50288 | -6.61248 | 0.693764 | H | -1.951   | -4.87084 | -5.13884 |

*m*[11]CPP

|   |          |          |          |   |          |          |          |
|---|----------|----------|----------|---|----------|----------|----------|
| C | 2.35275  | 6.772621 | -0.33977 | C | 5.008406 | -6.02968 | -1.24594 |
| C | 1.58332  | 6.204667 | -1.37132 | C | 6.115745 | -5.18835 | -1.18566 |
| C | 0.197247 | 6.271843 | -1.36401 | C | 6.424273 | -4.47162 | -0.01388 |
| C | -0.50006 | 6.907903 | -0.32228 | C | 5.68092  | -4.78408 | 1.138422 |
| C | 0.269776 | 7.587787 | 0.639405 | C | 4.580806 | -5.63239 | 1.081329 |
| C | 1.662019 | 7.523842 | 0.62947  | C | 8.091918 | -0.52888 | 0.122371 |
| C | -1.95473 | 6.652395 | -0.17575 | C | 8.250819 | -1.39523 | 1.2196   |
| C | -2.7757  | 6.399461 | -1.28933 | C | 7.856236 | -2.72814 | 1.146798 |
| C | -4.02283 | 5.800307 | -1.14568 | C | 7.274284 | -3.25354 | -0.02272 |
| C | -4.51625 | 5.436886 | 0.120027 | C | 7.29334  | -2.43508 | -1.1661  |
| C | -3.76663 | 5.841116 | 1.239091 | C | 7.696038 | -1.10615 | -1.09652 |
| C | -2.51392 | 6.428935 | 1.095056 | H | 2.067761 | 5.602051 | -2.13269 |
| C | -5.65209 | 4.488611 | 0.24273  | H | -0.35459 | 5.722717 | -2.12051 |
| C | -6.69879 | 4.416692 | -0.69353 | H | -0.22698 | 8.147432 | 1.427746 |
| C | -7.58952 | 3.343635 | -0.70193 | H | 2.217398 | 8.036303 | 1.410594 |
| C | -7.47224 | 2.295854 | 0.226307 | H | -2.40724 | 6.615931 | -2.2882  |
| C | -6.49597 | 2.425961 | 1.227994 | H | -4.58091 | 5.528377 | -2.0371  |
| C | -5.60723 | 3.49274  | 1.234904 | H | -4.14102 | 5.637327 | 2.238415 |
| C | -9.58868 | 0.957701 | -0.25883 | H | -1.92277 | 6.631513 | 1.983673 |
| C | -10.206  | -0.28321 | -0.42995 | H | -6.7955  | 5.189214 | -1.45181 |
| C | -9.49176 | -1.47188 | -0.26543 | H | -8.34376 | 3.284908 | -1.48247 |
| C | -8.13352 | -1.43402 | 0.086364 | H | -6.40726 | 1.655411 | 1.988618 |
| C | -7.53334 | -0.17875 | 0.26177  | H | -4.81577 | 3.511826 | 1.977779 |
| C | -8.23189 | 1.025497 | 0.093521 | H | -10.1624 | 1.872026 | -0.38542 |
| C | -7.27824 | -2.64226 | 0.215842 | H | -11.2607 | -0.32465 | -0.68933 |
| C | -7.32912 | -3.70545 | -0.70101 | H | -9.99151 | -2.42805 | -0.39637 |
| C | -6.36983 | -4.71782 | -0.68575 | H | -6.46832 | -0.13611 | 0.463784 |
| C | -5.3164  | -4.71121 | 0.2457   | H | -8.09105 | -3.70738 | -1.47624 |
| C | -5.32782 | -3.69755 | 1.220901 | H | -6.42242 | -5.50585 | -1.43229 |
| C | -6.28546 | -2.69277 | 1.208446 | H | -4.53219 | -3.65373 | 1.958026 |
| C | -4.13425 | -5.60358 | 0.145376 | H | -6.24302 | -1.90971 | 1.960115 |
| C | -3.62911 | -5.99993 | -1.10577 | H | -4.19986 | -5.78973 | -2.00588 |
| C | -2.36101 | -6.55983 | -1.22973 | H | -1.99307 | -6.80891 | -2.22104 |
| C | -1.52607 | -6.7349  | -0.11122 | H | -1.49132 | -6.60873 | 2.045879 |
| C | -2.08978 | -6.4709  | 1.150369 | H | -3.74194 | -5.70004 | 2.267991 |
| C | -3.36347 | -5.92835 | 1.275714 | H | 3.823    | 6.50025  | 1.953001 |
| C | 3.774645 | 6.368279 | -0.20389 | H | 5.86989  | 5.212091 | 2.225095 |
| C | 4.345326 | 6.157266 | 1.064485 | H | 6.139165 | 4.752158 | -2.04377 |
| C | 5.501919 | 5.399695 | 1.220534 | H | 4.170463 | 6.151814 | -2.31845 |
| C | 6.132067 | 4.791943 | 0.118572 | H | 0.060915 | -6.0199  | -2.18353 |



|   |          |          |          |   |          |          |          |
|---|----------|----------|----------|---|----------|----------|----------|
| C | 5.666968 | 5.163347 | -1.15684 | H | 2.486032 | -5.81936 | -2.19473 |
| C | 4.526065 | 5.941462 | -1.3139  | H | 2.674151 | -7.74038 | 1.645055 |
| C | -0.06451 | -6.96182 | -0.24328 | H | 0.236559 | -7.97031 | 1.646471 |
| C | 0.621455 | -6.44501 | -1.35683 | H | 6.266734 | 3.097499 | 2.225028 |
| C | 2.006269 | -6.329   | -1.36426 | H | 7.126426 | 0.828772 | 2.224762 |
| C | 2.776917 | -6.71494 | -0.25399 | H | 8.903202 | 1.487598 | -1.63255 |
| C | 2.106382 | -7.36539 | 0.797327 | H | 8.06878  | 3.785916 | -1.62144 |
| C | 0.719603 | -7.49113 | 0.799287 | H | 4.763845 | -6.51834 | -2.18558 |
| C | 7.031409 | 3.619108 | 0.271415 | H | 6.715422 | -5.0422  | -2.08004 |
| C | 6.885371 | 2.780759 | 1.391685 | H | 5.883687 | -4.25797 | 2.066228 |
| C | 7.375631 | 1.480973 | 1.392923 | H | 3.959985 | -5.7475  | 1.965184 |
| C | 8.028687 | 0.947013 | 0.268716 | H | 8.631392 | -1.00555 | 2.160315 |
| C | 8.332018 | 1.838189 | -0.77662 | H | 7.944182 | -3.35251 | 2.031862 |
| C | 7.85164  | 3.145329 | -0.77112 | H | 6.861388 | -2.7987  | -2.09345 |
| C | 4.165101 | -6.2037  | -0.13344 | H | 7.568147 | -0.47318 | -1.96989 |

*m*[12]CPP

|   |          |          |          |   |          |          |          |
|---|----------|----------|----------|---|----------|----------|----------|
| C | 1.689806 | -7.51429 | 0.055316 | C | 8.808247 | -1.25288 | -0.10717 |
| C | 0.909418 | -7.56065 | 1.225309 | C | 8.867901 | -0.6358  | 1.156611 |
| C | -0.47693 | -7.46687 | 1.17854  | C | 8.825953 | 0.746492 | 1.291794 |
| C | -1.16793 | -7.35468 | -0.04193 | C | 8.693652 | 1.586215 | 0.170946 |
| C | -0.39744 | -7.48197 | -1.21214 | C | 8.829358 | 0.979858 | -1.0911  |
| C | 0.990539 | -7.54373 | -1.16537 | C | 8.899168 | -0.40331 | -1.22567 |
| C | -2.59326 | -6.93795 | -0.08333 | C | 6.51891  | 5.300833 | 0.261342 |
| C | -3.09212 | -6.23484 | -1.19553 | C | 6.477704 | 4.389763 | 1.33134  |
| C | -4.33599 | -5.6157  | -1.16736 | C | 7.277279 | 3.256203 | 1.347888 |
| C | -5.13929 | -5.6482  | -0.01609 | C | 8.166542 | 2.968099 | 0.296872 |
| C | -4.68875 | -6.42657 | 1.063129 | C | 8.314399 | 3.952761 | -0.69806 |
| C | -3.45264 | -7.06679 | 1.02435  | C | 7.5094   | 5.090445 | -0.71611 |
| C | -6.31484 | -4.74625 | 0.078597 | H | 1.391524 | -7.61117 | 2.196818 |
| C | -7.20923 | -4.56619 | -0.98956 | H | -1.02068 | -7.40146 | 2.115838 |
| C | -8.15622 | -3.54366 | -0.97018 | H | -0.88265 | -7.4762  | -2.18337 |
| C | -8.23105 | -2.64929 | 0.109594 | H | 1.538159 | -7.53318 | -2.10254 |
| C | -7.39379 | -2.88189 | 1.212442 | H | -2.46457 | -6.08986 | -2.06868 |
| C | -6.46195 | -3.91501 | 1.201881 | H | -4.64898 | -5.01618 | -2.01767 |
| C | -10.4054 | -1.40954 | -0.34899 | H | -5.30785 | -6.51717 | 1.952053 |
| C | -11.0916 | -0.20031 | -0.47744 | H | -3.1427  | -7.65383 | 1.883967 |
| C | -10.4461 | 1.016709 | -0.25405 | H | -7.13958 | -5.21446 | -1.85927 |
| C | -9.09301 | 1.042264 | 0.119881 | H | -8.80089 | -3.39348 | -1.83235 |
| C | -8.42777 | -0.18356 | 0.273676 | H | -7.45262 | -2.22097 | 2.073178 |
| C | -9.05596 | -1.4136  | 0.033853 | H | -5.78598 | -4.0343  | 2.04421  |
| C | -8.3134  | 2.298785 | 0.262833 | H | -10.9171 | -2.35018 | -0.53469 |
| C | -8.45591 | 3.362888 | -0.64361 | H | -12.142  | -0.20643 | -0.75668 |
| C | -7.57255 | 4.440602 | -0.63575 | H | -10.9945 | 1.948701 | -0.36224 |
| C | -6.50671 | 4.502328 | 0.278624 | H | -7.36734 | -0.18064 | 0.505529 |
| C | -6.42636 | 3.483577 | 1.244829 | H | -9.22869 | 3.315471 | -1.40631 |

|   |          |          |          |   |          |          |          |
|---|----------|----------|----------|---|----------|----------|----------|
| C | -7.30864 | 2.410215 | 1.238144 | H | -7.69327 | 5.229281 | -1.37361 |
| C | -5.40241 | 5.486812 | 0.159252 | H | -5.61711 | 3.49555  | 1.968829 |
| C | -4.9374  | 5.886676 | -1.10615 | H | -7.19555 | 1.624929 | 1.980324 |
| C | -3.73579 | 6.572324 | -1.25025 | H | -5.48246 | 5.586041 | -1.99641 |
| C | -2.93625 | 6.884556 | -0.13679 | H | -3.38718 | 6.824022 | -2.24809 |
| C | -3.4646  | 6.598355 | 1.134463 | H | -2.88384 | 6.836879 | 2.021088 |
| C | -4.67022 | 5.918821 | 1.278889 | H | -5.02406 | 5.676782 | 2.27727  |
| C | 3.147757 | -7.23051 | 0.092674 | H | 3.629325 | -7.97176 | -1.8838  |
| C | 3.983228 | -7.40426 | -1.02798 | H | 5.832494 | -6.91934 | -2.00023 |
| C | 5.242142 | -6.81285 | -1.0936  | H | 5.322944 | -5.41323 | 1.990808 |
| C | 5.738226 | -6.03865 | -0.03042 | H | 3.110334 | -6.40977 | 2.093689 |
| C | 4.973473 | -6.00237 | 1.147756 | H | -1.40667 | 8.592376 | 1.439793 |
| C | 3.708905 | -6.57505 | 1.204028 | H | 1.031615 | 8.816728 | 1.398988 |
| C | -1.51924 | 7.298272 | -0.28707 | H | 1.191617 | 6.315364 | -2.09621 |
| C | -0.84258 | 8.089902 | 0.658289 | H | -1.23057 | 6.106737 | -2.06306 |
| C | 0.544736 | 8.216644 | 0.634834 | H | 6.257627 | -4.4932  | -2.16628 |
| C | 1.323406 | 7.552151 | -0.33076 | H | 7.548359 | -2.43521 | -2.20192 |
| C | 0.632881 | 6.858829 | -1.34088 | H | 9.117464 | -3.34979 | 1.700411 |
| C | -0.75008 | 6.737237 | -1.32109 | H | 7.773454 | -5.39163 | 1.751767 |
| C | 6.859322 | -5.07802 | -0.17987 | H | 2.823883 | 7.518589 | 1.946916 |
| C | 6.90996  | -4.26884 | -1.32708 | H | 5.075577 | 6.617596 | 2.208814 |
| C | 7.652124 | -3.09389 | -1.34597 | H | 5.404256 | 6.201975 | -2.05815 |
| C | 8.39493  | -2.67557 | -0.2264  | H | 3.19874  | 7.211941 | -2.3258  |
| C | 8.488162 | -3.58366 | 0.846438 | H | 8.840616 | -1.24247 | 2.056288 |
| C | 7.729014 | -4.75022 | 0.875182 | H | 8.812882 | 1.173829 | 2.29029  |
| C | 2.792142 | 7.375103 | -0.20902 | H | 8.772443 | 1.58836  | -1.9891  |
| C | 3.39559  | 7.270812 | 1.057263 | H | 8.940803 | -0.82601 | -2.22517 |
| C | 4.670262 | 6.73558  | 1.207815 | H | 5.723639 | 4.503454 | 2.103578 |
| C | 5.397392 | 6.2598   | 0.10153  | H | 7.117843 | 2.523848 | 2.132442 |
| C | 4.864246 | 6.524985 | -1.1727  | H | 9.039017 | 3.809062 | -1.49527 |
| C | 3.596614 | 7.077451 | -1.32395 | H | 7.625813 | 5.80493  | -1.5269  |

*m*[13]CPP

|   |          |          |          |   |          |          |          |
|---|----------|----------|----------|---|----------|----------|----------|
| C | -0.64743 | -8.32145 | -0.25392 | C | -9.56171 | -2.70944 | -0.73232 |
| C | 0.000962 | -7.74284 | -1.35832 | C | -5.70118 | 6.868039 | -0.27387 |
| C | 1.373707 | -7.52329 | -1.35531 | C | -5.92438 | 6.004333 | -1.35967 |
| C | 2.169224 | -7.87904 | -0.25191 | C | -6.93169 | 5.049482 | -1.32752 |
| C | 1.53758  | -8.57284 | 0.796828 | C | -7.77887 | 4.911771 | -0.21299 |
| C | 0.161711 | -8.78424 | 0.798656 | C | -7.64359 | 5.868416 | 0.810974 |
| C | 3.559284 | -7.37003 | -0.14482 | C | -6.62529 | 6.818857 | 0.784914 |
| C | 4.34441  | -7.09063 | -1.27756 | C | -8.59473 | 3.679772 | -0.06861 |
| C | 5.52097  | -6.35353 | -1.17873 | C | -8.96945 | 2.906843 | -1.18278 |
| C | 5.977945 | -5.86977 | 0.059739 | C | -9.3655  | 1.581686 | -1.04372 |
| C | 5.259354 | -6.25788 | 1.204    | C | -9.4367  | 0.964609 | 0.218878 |
| C | 4.077571 | -6.98274 | 1.103909 | C | -9.25272 | 1.797597 | 1.337966 |
| C | 7.068194 | -4.86623 | 0.138983 | C | -8.82919 | 3.11488  | 1.19829  |
| C | 6.981203 | -3.82613 | 1.08143  | H | -0.59185 | -7.36405 | -2.18596 |
| C | 7.879305 | -2.76739 | 1.074437 | H | 1.816764 | -6.97587 | -2.18172 |
| C | 8.907593 | -2.68808 | 0.120597 | H | 2.126613 | -8.92753 | 1.638154 |
| C | 9.0419   | -3.76103 | -0.77623 | H | -0.29676 | -9.29217 | 1.643185 |
| C | 8.142222 | -4.82623 | -0.76719 | H | 4.008655 | -7.41631 | -2.25812 |
| C | 11.11192 | -1.48279 | -0.26918 | H | 6.054317 | -6.08863 | -2.08742 |
| C | 11.82361 | -0.28727 | -0.38194 | H | 5.607992 | -5.95136 | 2.186089 |
| C | 11.19027 | 0.944489 | -0.20873 | H | 3.509738 | -7.18618 | 2.006936 |
| C | 9.818739 | 0.997136 | 0.086285 | H | 6.16219  | -3.81627 | 1.794071 |
| C | 9.120756 | -0.21432 | 0.196334 | H | 7.769528 | -1.97341 | 1.807555 |
| C | 9.739736 | -1.46119 | 0.026209 | H | 9.82948  | -3.73706 | -1.5249  |
| C | 9.065838 | 2.268948 | 0.235044 | H | 8.264741 | -5.62821 | -1.49031 |
| C | 8.030695 | 2.368177 | 1.179689 | H | 11.6244  | -2.43315 | -0.39201 |
| C | 7.196275 | 3.477175 | 1.222815 | H | 12.88874 | -0.31626 | -0.59668 |
| C | 7.358024 | 4.550208 | 0.328423 | H | 11.76342 | 1.864585 | -0.28507 |
| C | 8.445062 | 4.488344 | -0.56109 | H | 8.047954 | -0.18403 | 0.355475 |
| C | 9.279676 | 3.372656 | -0.60739 | H | 7.862108 | 1.550295 | 1.874337 |
| C | 6.322251 | 5.6111   | 0.266314 | H | 6.366163 | 3.483361 | 1.922547 |
| C | 5.92921  | 6.168306 | -0.96325 | H | 8.627156 | 5.313148 | -1.24483 |
| C | 4.790011 | 6.960416 | -1.06662 | H | 10.076   | 3.335504 | -1.34618 |
| C | 3.979016 | 7.224315 | 0.051534 | H | 6.479666 | 5.918038 | -1.86574 |
| C | 4.439151 | 6.765134 | 1.298471 | H | 4.50104  | 7.341768 | -2.04196 |
| C | 5.584905 | 5.984329 | 1.403799 | H | 3.850519 | 6.956541 | 2.190954 |
| C | -2.12467 | -8.23481 | -0.14819 | H | 5.886824 | 5.62127  | 2.382118 |
| C | -2.70876 | -7.83002 | 1.063941 | H | -2.08625 | -7.72909 | 1.948409 |
| C | -4.03548 | -7.41879 | 1.122407 | H | -4.41179 | -7.00256 | 2.051893 |
| C | -4.84751 | -7.40037 | -0.0255  | H | -4.91677 | -8.01511 | -2.09735 |
| C | -4.30224 | -7.94243 | -1.20418 | H | -2.57132 | -8.71672 | -2.20558 |
| C | -2.97085 | -8.34399 | -1.26599 | H | 2.301817 | 6.941297 | -2.0467  |
| C | 2.613392 | 7.788676 | -0.08524 | H | -0.08409 | 7.425965 | -2.13627 |
| C | 1.848507 | 7.488815 | -1.22605 | H | 0.133105 | 9.262542 | 1.743873 |
| C | 0.487936 | 7.764563 | -1.27756 | H | 2.535625 | 8.788674 | 1.829562 |
| C | -0.1815  | 8.350652 | -0.18929 | H | -6.65537 | -7.03543 | 2.042108 |
| C | 0.602504 | 8.752469 | 0.906687 | H | -8.34394 | -5.26513 | 2.186418 |

|   |          |          |          |   |          |          |          |
|---|----------|----------|----------|---|----------|----------|----------|
| C | 1.967567 | 8.48054  | 0.955926 | H | -7.65838 | -4.2785  | -1.93937 |
| C | -6.11919 | -6.6342  | -0.01391 | H | -5.95443 | -6.01835 | -2.07741 |
| C | -6.86384 | -6.43158 | 1.16318  | H | -1.95774 | 8.790108 | -2.25276 |
| C | -7.82639 | -5.42982 | 1.24486  | H | -4.32769 | 8.158428 | -2.28925 |
| C | -8.09942 | -4.5926  | 0.148449 | H | -4.15045 | 7.264455 | 1.911132 |
| C | -7.47254 | -4.90316 | -1.07024 | H | -1.78701 | 7.890168 | 1.947011 |
| C | -6.50227 | -5.89642 | -1.14789 | H | -7.9138  | -2.90082 | 2.222378 |
| C | -1.66493 | 8.336324 | -0.16092 | H | -8.45832 | -0.53333 | 2.253301 |
| C | -2.43166 | 8.453547 | -1.33457 | H | -10.4572 | -0.94091 | -1.53606 |
| C | -3.77581 | 8.096672 | -1.35507 | H | -9.86692 | -3.3144  | -1.58237 |
| C | -4.41659 | 7.607075 | -0.20247 | H | -5.22789 | 6.003904 | -2.19281 |
| C | -3.68973 | 7.635739 | 1.000046 | H | -6.9861  | 4.329234 | -2.13723 |
| C | -2.34438 | 7.991501 | 1.020107 | H | -8.31955 | 5.847598 | 1.661436 |
| C | -8.79766 | -3.29156 | 0.294426 | H | -6.52616 | 7.512233 | 1.616196 |
| C | -8.50432 | -2.48845 | 1.409399 | H | -8.8833  | 3.322827 | -2.18226 |
| C | -8.81929 | -1.13564 | 1.426093 | H | -9.52958 | 0.993978 | -1.9417  |
| C | -9.45705 | -0.51598 | 0.335898 | H | -9.37159 | 1.393093 | 2.338756 |
| C | -9.89188 | -1.35679 | -0.70676 | H | -8.58711 | 3.680037 | 2.093426 |

Cartesian coordinates for the rotation process of **Fe-[8]CPP**

**Fe-[8]CPP-A** (PBE0-D3(BJ)/6-31G(d,p) for C, H, SDD for Fe)

|   |          |          |          |   |          |          |          |
|---|----------|----------|----------|---|----------|----------|----------|
| C | -0.63799 | 6.271578 | -1.06812 | C | -4.94519 | 5.184919 | 1.136919 |
| C | 0.719451 | 5.979657 | -1.11935 | C | -5.42577 | 4.469365 | 0.029381 |
| C | 1.347453 | 5.257486 | -0.09252 | C | -2.90682 | -5.71126 | 0.086255 |
| C | 0.592932 | 5.006304 | 1.061915 | C | -3.3785  | -5.11575 | 1.263511 |
| C | -0.75639 | 5.312266 | 1.121773 | C | -3.81146 | -5.832   | -0.97974 |
| C | -1.42163 | 5.871375 | 0.023    | C | -4.61737 | -4.49513 | 1.304495 |
| C | -6.41469 | 2.618011 | 1.334337 | C | -5.05124 | -5.20848 | -0.93987 |
| C | -6.92556 | 1.33009  | 1.351148 | C | -5.43743 | -4.44133 | 0.169376 |
| C | -7.46478 | 0.75053  | 0.194876 | H | -1.10847 | 6.770042 | -1.91157 |
| C | -7.66029 | 1.590897 | -0.91188 | H | 1.286488 | 6.26814  | -1.99988 |
| C | -7.14895 | 2.88184  | -0.92834 | H | 1.032036 | 4.444915 | 1.879984 |
| C | -6.42094 | 3.384402 | 0.161042 | H | -1.33397 | 4.984985 | 1.981103 |
| C | -7.10275 | -2.84906 | 1.210507 | H | -5.86539 | 2.973109 | 2.200777 |
| C | -7.61082 | -1.55717 | 1.214674 | H | -6.76129 | 0.713719 | 2.229676 |
| C | -7.47396 | -0.72396 | 0.093601 | H | -8.1536  | 1.203924 | -1.79948 |
| C | -7.00719 | -1.31268 | -1.08927 | H | -7.25246 | 3.482181 | -1.82822 |
| C | -6.50235 | -2.60381 | -1.09436 | H | -7.15267 | -3.44366 | 2.118795 |
| C | -6.44114 | -3.36011 | 0.083652 | H | -8.05114 | -1.16242 | 2.126374 |
| C | -0.86711 | -5.51984 | -1.30261 | H | -6.89169 | -0.70187 | -1.97948 |
| C | 0.485897 | -5.23268 | -1.39252 | H | -6.00635 | -2.96958 | -1.98837 |
| C | 1.316793 | -5.3014  | -0.26648 | H | -1.50434 | -5.31738 | -2.15807 |
| C | 0.769449 | -5.84399 | 0.905436 | H | 0.874546 | -4.81486 | -2.31632 |
| C | -0.58554 | -6.13418 | 0.99467  | H | 1.402795 | -5.98524 | 1.777153 |
| C | -1.4498  | -5.89038 | -0.08324 | H | -0.99031 | -6.49796 | 1.935249 |
| C | 5.153655 | 1.168466 | -0.80017 | H | 3.640401 | 0.074732 | 0.416725 |
| C | 4.499002 | 0.032078 | -0.2396  | H | 6.853078 | -1.41321 | -2.1162  |
| C | 5.100173 | -1.15987 | -0.74412 | H | 6.905417 | 1.280772 | -2.18952 |
| C | 6.159915 | -0.75186 | -1.6127  | H | 4.768625 | 2.580492 | 1.506949 |
| C | 6.189836 | 0.6741   | -1.65017 | H | 3.14171  | 4.395653 | 1.813062 |
| C | 4.291239 | 3.028568 | 0.640514 | H | 2.496122 | 4.502664 | -2.43155 |
| C | 3.357308 | 4.041021 | 0.809446 | H | 4.189376 | 2.76219  | -2.73039 |
| C | 2.632378 | 4.548041 | -0.27974 | H | 4.783009 | -3.20013 | -2.51342 |
| C | 3.027428 | 4.1334   | -1.55978 | H | 3.160604 | -5.03731 | -2.30857 |
| C | 3.982825 | 3.140796 | -1.73317 | H | 2.368852 | -3.8748  | 1.745262 |
| C | 4.565022 | 2.508562 | -0.62941 | H | 4.047607 | -2.09008 | 1.559502 |
| C | 4.284323 | -3.37181 | -1.56341 | H | 8.76462  | -1.576   | 0.394891 |
| C | 3.354098 | -4.3985  | -1.45111 | H | 9.031022 | 1.103033 | 0.219159 |
| C | 2.595262 | -4.56036 | -0.2841  | H | 7.168452 | 2.231169 | 1.797121 |
| C | 2.930379 | -3.76564 | 0.821996 | H | 5.745055 | 0.249818 | 2.957143 |
| C | 3.864743 | -2.74807 | 0.71421  | H | 6.729332 | -2.10246 | 2.075601 |
| C | 4.493707 | -2.47696 | -0.50778 | H | -2.86616 | 5.133551 | -2.1067  |
| C | 8.187675 | -0.84171 | 0.940559 | H | -3.31627 | 6.274261 | 2.003073 |
| C | 8.32772  | 0.572888 | 0.846945 | H | -5.0467  | 4.04175  | -2.04711 |
| C | 7.340971 | 1.169448 | 1.682575 | H | -5.52065 | 5.198252 | 2.058551 |
| C | 6.589952 | 0.122897 | 2.293373 | H | -2.70896 | -5.00609 | 2.111231 |

|   |          |          |          |    |          |          |          |
|---|----------|----------|----------|----|----------|----------|----------|
| C | 7.113578 | -1.12036 | 1.833719 | H  | -3.51226 | -6.36276 | -1.8795  |
| C | -2.8905  | 5.725393 | -0.03805 | H  | -4.8851  | -3.91471 | 2.182255 |
| C | -3.46349 | 5.197064 | -1.20177 | H  | -5.70062 | -5.25862 | -1.80981 |
| C | -3.69955 | 5.796019 | 1.105605 | Fe | 6.459333 | -0.00176 | 0.262774 |
| C | -4.70454 | 4.578443 | -1.16743 |    |          |          |          |

**Fe-[8]CPP-B (PBE0-D3(BJ)/6-31G(d,p) for C, H, SDD for Fe)**

|   |          |          |          |   |          |          |          |
|---|----------|----------|----------|---|----------|----------|----------|
| C | 0.049216 | 6.315462 | -1.46016 | C | -4.14066 | 5.395375 | 1.01347  |
| C | 1.396904 | 5.998222 | -1.56043 | C | -4.66892 | 4.643338 | -0.04679 |
| C | 2.083956 | 5.418229 | -0.48375 | C | -2.58621 | -5.72961 | 0.025662 |
| C | 1.415903 | 5.353308 | 0.74622  | C | -2.92665 | -5.03544 | 1.195536 |
| C | 0.068413 | 5.666159 | 0.844868 | C | -3.58705 | -5.857   | -0.95116 |
| C | -0.66697 | 6.061664 | -0.28066 | C | -4.12364 | -4.34726 | 1.302086 |
| C | -5.62595 | 2.829419 | 1.334425 | C | -4.78193 | -5.15565 | -0.85172 |
| C | -6.17279 | 1.557445 | 1.397021 | C | -5.03442 | -4.31005 | 0.238244 |
| C | -6.79514 | 0.980633 | 0.281552 | H | -0.47207 | 6.703202 | -2.33123 |
| C | -7.02188 | 1.810522 | -0.82701 | H | 1.908982 | 6.139407 | -2.50849 |
| C | -6.47263 | 3.08421  | -0.89046 | H | 1.919144 | 4.915005 | 1.603338 |
| C | -5.67609 | 3.580501 | 0.1527   | H | -0.45101 | 5.461304 | 1.776156 |
| C | -6.54437 | -2.61496 | 1.343846 | H | -5.02129 | 3.181591 | 2.16466  |
| C | -6.9838  | -1.29847 | 1.352995 | H | -5.98022 | 0.948082 | 2.274663 |
| C | -6.87518 | -0.49349 | 0.208504 | H | -7.57544 | 1.42772  | -1.6802  |
| C | -6.51509 | -1.12644 | -0.98895 | H | -6.60533 | 3.676015 | -1.79218 |
| C | -6.08155 | -2.44376 | -0.99985 | H | -6.56459 | -3.1904  | 2.265528 |
| C | -5.98555 | -3.18051 | 0.18786  | H | -7.34534 | -0.86534 | 2.28169  |
| C | -0.66702 | -5.93842 | -1.55548 | H | -6.42537 | -0.53811 | -1.89715 |
| C | 0.677233 | -5.71262 | -1.80799 | H | -5.66487 | -2.85391 | -1.91509 |
| C | 1.587579 | -5.5149  | -0.75935 | H | -1.35936 | -5.9392  | -2.3917  |
| C | 1.131333 | -5.80074 | 0.535809 | H | 1.004568 | -5.59118 | -2.83638 |
| C | -0.20819 | -6.06051 | 0.785501 | H | 1.809978 | -5.70351 | 1.378142 |
| C | -1.16004 | -6.01268 | -0.24417 | H | -0.52938 | -6.20558 | 1.812646 |
| C | 5.526885 | 0.987179 | -0.58359 | H | 3.914036 | -0.03418 | -1.72837 |
| C | 4.817638 | -0.11902 | -1.1423  | H | 7.106891 | -1.67443 | 0.731411 |
| C | 5.387106 | -1.34456 | -0.67698 | H | 7.264586 | 1.001588 | 0.838741 |
| C | 6.470874 | -0.9869  | 0.190053 | H | 5.718058 | 3.084553 | 1.197107 |
| C | 6.5553   | 0.43743  | 0.247911 | H | 4.244609 | 5.049016 | 1.23044  |
| C | 5.08765  | 3.293709 | 0.337241 | H | 2.712498 | 3.954532 | -2.62489 |
| C | 4.240615 | 4.394088 | 0.363099 | H | 4.241242 | 2.041663 | -2.68892 |
| C | 3.309562 | 4.612706 | -0.66464 | H | 3.766614 | -1.99234 | -2.71391 |
| C | 3.402598 | 3.79934  | -1.80083 | H | 2.092209 | -3.75637 | -2.71499 |
| C | 4.251925 | 2.703372 | -1.82797 | H | 3.953984 | -5.52895 | 0.724536 |
| C | 5.027416 | 2.366776 | -0.71305 | H | 5.564955 | -3.68707 | 0.789888 |
| C | 3.812263 | -2.76218 | -1.95019 | H | 4.949674 | 1.440202 | 3.146744 |
| C | 2.876285 | -3.78251 | -1.96534 | H | 2.9369   | 1.86645  | 1.40777  |
| C | 2.838527 | -4.75325 | -0.95526 | H | 1.964804 | -0.53394 | 0.654921 |
| C | 3.896088 | -4.7498  | -0.03077 | H | 3.404258 | -2.43736 | 1.88294  |
| C | 4.823928 | -3.71569 | -0.00457 | H | 5.244759 | -1.22446 | 3.441755 |
| C | 4.734851 | -2.64394 | -0.90472 | H | -2.19387 | 5.20403  | -2.30354 |

|   |          |          |          |    |          |          |          |
|---|----------|----------|----------|----|----------|----------|----------|
| C | 4.333614 | 0.67804  | 2.688618 | H  | -2.48632 | 6.526056 | 1.76817  |
| C | 3.259296 | 0.903694 | 1.78124  | H  | -4.37161 | 4.130518 | -2.11654 |
| C | 2.752601 | -0.36321 | 1.376097 | H  | -4.67829 | 5.444093 | 1.956591 |
| C | 3.510609 | -1.37175 | 2.034455 | H  | -2.18827 | -4.9081  | 1.980097 |
| C | 4.489777 | -0.73061 | 2.844769 | H  | -3.40327 | -6.45817 | -1.83718 |
| C | -2.13499 | 5.892521 | -0.26418 | H  | -4.28582 | -3.7062  | 2.163303 |
| C | -2.75309 | 5.310253 | -1.37894 | H  | -5.50229 | -5.21398 | -1.66345 |
| C | -2.89903 | 6.007543 | 0.906958 | Fe | 4.729831 | -0.19616 | 0.886035 |
| C | -3.99285 | 4.699446 | -1.27283 |    |          |          |          |

**Fe-[8]CPP-TS-1 (PBE0-D3(BJ)/6-31G(d,p) for C, H, SDD for Fe)**

|   |          |          |          |   |          |          |          |
|---|----------|----------|----------|---|----------|----------|----------|
| C | 0.426865 | -6.0839  | -1.69598 | C | 4.389686 | -5.28459 | 1.156865 |
| C | -0.90741 | -5.7536  | -1.88757 | C | 5.011649 | -4.52697 | 0.153504 |
| C | -1.69064 | -5.27765 | -0.82708 | C | 2.701141 | 5.730577 | -0.2214  |
| C | -1.13599 | -5.32218 | 0.457901 | C | 3.04761  | 5.23045  | 1.040279 |
| C | 0.202963 | -5.63412 | 0.645274 | C | 3.694592 | 5.72985  | -1.21131 |
| C | 1.037408 | -5.92924 | -0.44164 | C | 4.252115 | 4.572657 | 1.240358 |
| C | 5.826668 | -2.68906 | 1.593546 | C | 4.904669 | 5.081623 | -1.00663 |
| C | 6.346407 | -1.406   | 1.675854 | C | 5.163508 | 4.39577  | 0.190372 |
| C | 7.059264 | -0.84572 | 0.607384 | H | 1.022069 | -6.39862 | -2.54861 |
| C | 7.411193 | -1.7     | -0.44891 | H | -1.33383 | -5.8025  | -2.88601 |
| C | 6.889471 | -2.98348 | -0.53228 | H | -1.72221 | -4.96756 | 1.301133 |
| C | 5.997446 | -3.46368 | 0.438614 | H | 0.635549 | -5.50854 | 1.633143 |
| C | 6.62742  | 2.788704 | 1.486054 | H | 5.148694 | -3.03222 | 2.369354 |
| C | 7.098769 | 1.486747 | 1.592009 | H | 6.060991 | -0.77727 | 2.513908 |
| C | 7.098668 | 0.626487 | 0.483622 | H | 8.038398 | -1.32722 | -1.25426 |
| C | 6.801783 | 1.19009  | -0.76454 | H | 7.115609 | -3.59501 | -1.40171 |
| C | 6.327706 | 2.487805 | -0.86919 | H | 6.575477 | 3.407549 | 2.377746 |
| C | 6.132209 | 3.281889 | 0.268894 | H | 7.403775 | 1.109435 | 2.564447 |
| C | 0.770924 | 5.33154  | -1.70194 | H | 6.793384 | 0.556883 | -1.64643 |
| C | -0.58057 | 5.063526 | -1.84765 | H | 5.96162  | 2.833095 | -1.83104 |
| C | -1.499   | 5.384456 | -0.83877 | H | 1.467735 | 4.949909 | -2.44228 |
| C | -1.02116 | 6.141033 | 0.24266  | H | -0.90364 | 4.476142 | -2.70104 |
| C | 0.335476 | 6.395726 | 0.398145 | H | -1.71256 | 6.483745 | 1.007317 |
| C | 1.269572 | 5.921058 | -0.53307 | H | 0.681891 | 6.921064 | 1.284276 |
| C | -5.38151 | -0.99735 | -0.84642 | H | -3.52328 | 0.225213 | -1.04253 |
| C | -4.59398 | 0.189886 | -0.89084 | H | -7.59965 | 1.437026 | -0.1509  |
| C | -5.41002 | 1.325676 | -0.62225 | H | -7.56678 | -1.2466  | -0.40009 |
| C | -6.73562 | 0.836011 | -0.40137 | H | -5.70817 | -3.37888 | 0.55996  |
| C | -6.71778 | -0.58915 | -0.53394 | H | -4.10278 | -5.24669 | 0.570109 |
| C | -4.90939 | -3.40233 | -0.1737  | H | -2.01994 | -3.461   | -2.72609 |
| C | -4.00023 | -4.45474 | -0.16727 | H | -3.62886 | -1.60232 | -2.73323 |
| C | -2.90688 | -4.46601 | -1.04415 | H | -4.69919 | 2.688432 | -2.81596 |
| C | -2.84939 | -3.46813 | -2.02489 | H | -3.03478 | 4.484212 | -2.95473 |
| C | -3.74664 | -2.41154 | -2.01835 | H | -2.96991 | 4.722487 | 1.33229  |
| C | -4.74033 | -2.31299 | -1.03721 | H | -4.69835 | 3.000942 | 1.447262 |
| C | -4.34363 | 3.160073 | -1.90378 | H | -7.39361 | -0.09512 | 2.997463 |

|   |          |          |          |    |          |          |          |
|---|----------|----------|----------|----|----------|----------|----------|
| C | -3.38914 | 4.165724 | -1.97867 | H  | -6.00679 | -2.32977 | 2.435644 |
| C | -2.81087 | 4.700319 | -0.81736 | H  | -3.44718 | -1.6343  | 1.966331 |
| C | -3.37984 | 4.328187 | 0.407434 | H  | -3.24109 | 1.036434 | 2.291088 |
| C | -4.35296 | 3.339711 | 0.479573 | H  | -5.69371 | 1.976611 | 2.95064  |
| C | -4.78479 | 2.670528 | -0.66733 | H  | 2.740733 | -5.04701 | -2.31397 |
| C | -6.33012 | -0.15332 | 2.809214 | H  | 2.677382 | -6.42132 | 1.752217 |
| C | -5.59559 | -1.33283 | 2.507411 | H  | 4.897206 | -3.99441 | -1.92883 |
| C | -4.23943 | -0.96563 | 2.275558 | H  | 4.841436 | -5.34194 | 2.143643 |
| C | -4.1336  | 0.444183 | 2.441999 | H  | 2.303055 | 5.221914 | 1.83102  |
| C | -5.42641 | 0.943602 | 2.774678 | H  | 3.487657 | 6.182945 | -2.17723 |
| C | 2.499142 | -5.76167 | -0.29559 | H  | 4.418308 | 4.061374 | 2.18363  |
| C | 3.214633 | -5.16951 | -1.3452  | H  | 5.629376 | 5.043475 | -1.8153  |
| C | 3.161089 | -5.89315 | 0.935102 | Fe | -5.46463 | -0.00725 | 0.95317  |
| C | 4.443902 | -4.56906 | -1.12684 |    |          |          |          |

**Fe-[8]CPP-TS-2 (PBE0-D3(BJ)/6-31G(d,p) for C, H, SDD for Fe)**

|   |          |          |          |   |          |          |          |
|---|----------|----------|----------|---|----------|----------|----------|
| C | -7.06965 | -0.16789 | 0.456462 | C | -5.41178 | 4.24452  | -1.07593 |
| C | -6.82752 | -1.53039 | 0.337687 | C | -4.66476 | 4.433742 | 0.097167 |
| C | -6.12579 | -2.04583 | -0.76465 | C | 6.259499 | 2.1592   | -0.20971 |
| C | -5.92396 | -1.17749 | -1.84724 | C | 5.639473 | 2.77058  | -1.30861 |
| C | -6.17573 | 0.18066  | -1.7339  | C | 6.21127  | 2.845182 | 1.013955 |
| C | -6.63533 | 0.730929 | -0.53018 | C | 4.845153 | 3.89541  | -1.15094 |
| C | -2.66109 | 5.389525 | -1.00481 | C | 5.411632 | 3.969527 | 1.172968 |
| C | -1.3397  | 5.801697 | -0.92636 | C | 4.632153 | 4.459334 | 0.113846 |
| C | -0.75456 | 6.129182 | 0.303978 | H | -7.52304 | 0.213066 | 1.367854 |
| C | -1.59944 | 6.19025  | 1.422069 | H | -7.09866 | -2.18706 | 1.159926 |
| C | -2.92418 | 5.781346 | 1.342484 | H | -5.39946 | -1.5331  | -2.72826 |
| C | -3.45957 | 5.288606 | 0.142693 | H | -5.84627 | 0.840794 | -2.53063 |
| C | 2.883818 | 6.097157 | -0.68972 | H | -3.03776 | 5.012756 | -1.95089 |
| C | 1.556641 | 6.502239 | -0.64528 | H | -0.71551 | 5.7399   | -1.81281 |
| C | 0.719167 | 6.122616 | 0.414234 | H | -1.1984  | 6.512451 | 2.379303 |
| C | 1.314785 | 5.472782 | 1.503391 | H | -3.53762 | 5.791639 | 2.239333 |
| C | 2.640025 | 5.066252 | 1.458015 | H | 3.491328 | 6.359665 | -1.5516  |
| C | 3.429192 | 5.292603 | 0.322146 | H | 1.146856 | 7.075466 | -1.47253 |
| C | 6.254064 | -0.12117 | 0.750062 | H | 0.696827 | 5.162064 | 2.340635 |
| C | 5.985531 | -1.46477 | 0.535692 | H | 3.027338 | 4.444883 | 2.259965 |
| C | 6.047103 | -2.01564 | -0.75204 | H | 6.02081  | 0.307434 | 1.720021 |
| C | 6.645161 | -1.2337  | -1.75256 | H | 5.547339 | -2.04581 | 1.341834 |
| C | 6.917862 | 0.110488 | -1.53619 | H | 6.800706 | -1.65479 | -2.74242 |
| C | 6.600338 | 0.723588 | -0.31331 | H | 7.291854 | 0.713843 | -2.35902 |
| C | -1.23731 | -4.2392  | -0.52663 | H | -0.01583 | -6.1022  | -0.81905 |
| C | -0.0575  | -5.02353 | -0.74631 | H | 1.181603 | -1.91427 | -0.62098 |
| C | 1.062391 | -4.12908 | -0.82847 | H | -1.51009 | -2.0418  | -0.2812  |
| C | 0.560646 | -2.79956 | -0.65178 | H | -2.89811 | -4.69731 | -2.64408 |
| C | -0.83287 | -2.86563 | -0.46239 | H | -5.13755 | -3.7182  | -2.779   |
| C | -3.40765 | -4.40865 | -1.72852 | H | -5.12339 | -3.14512 | 1.476746 |
| C | -4.67087 | -3.83351 | -1.80452 | H | -2.93086 | -4.20639 | 1.605131 |



|   |          |          |          |    |          |          |          |
|---|----------|----------|----------|----|----------|----------|----------|
| C | -5.26108 | -3.24575 | -0.67296 | H  | 3.146927 | -5.29676 | 0.679377 |
| C | -4.68168 | -3.54268 | 0.568004 | H  | 5.409896 | -4.33735 | 0.709039 |
| C | -3.42824 | -4.13474 | 0.645802 | H  | 4.542587 | -2.22462 | -2.92516 |
| C | -2.70868 | -4.43925 | -0.51331 | H  | 2.299309 | -3.19407 | -2.94922 |
| C | 3.461617 | -4.64766 | -0.13138 | H  | 0.768729 | -1.75035 | 2.60761  |
| C | 4.742608 | -4.10043 | -0.11588 | H  | -1.63955 | -2.90024 | 2.913143 |
| C | 5.116634 | -3.12747 | -1.05515 | H  | -1.31047 | -5.58239 | 2.749952 |
| C | 4.272501 | -2.9458  | -2.15968 | H  | 1.304557 | -6.07118 | 2.360404 |
| C | 2.996251 | -3.48613 | -2.16853 | H  | 2.589434 | -3.69189 | 2.267143 |
| C | 2.522076 | -4.23023 | -1.08095 | H  | -5.76336 | 1.705108 | 1.796375 |
| C | 0.573041 | -2.81376 | 2.635008 | H  | -6.71706 | 2.965397 | -2.19216 |
| C | -0.70174 | -3.42519 | 2.792556 | H  | -4.36162 | 3.674892 | 2.089969 |
| C | -0.52789 | -4.83675 | 2.704443 | H  | -5.31217 | 4.951638 | -1.89499 |
| C | 0.857413 | -5.09546 | 2.496514 | H  | 5.653374 | 2.272937 | -2.27333 |
| C | 1.536459 | -3.84395 | 2.45757  | H  | 6.748098 | 2.451356 | 1.872807 |
| C | -6.29697 | 2.141279 | -0.24281 | H  | 4.264425 | 4.249457 | -1.99737 |
| C | -5.71525 | 2.438918 | 0.997368 | H  | 5.339111 | 4.435435 | 2.152078 |
| C | -6.21072 | 3.121367 | -1.24328 | Fe | 0.115406 | -3.9334  | 0.984469 |
| C | -4.91548 | 3.559477 | 1.163144 |    |          |          |          |

## 11. Reference

- [S1] A. Zirakzadeh, A. Herlein, M. A. Gross, K. Mereiter, Y. Wang, W. Weissensteiner, *Organometallics* **2015**, *34*, 3820-3832.
- [S2] CrysAlisPro 2012; Version 1.171.36.31: Agilent Technologies.
- [S3] a) O. V. Dolomanov, L. J. Bourhis, R. J. Gildea, J. A. K. Howard, H. Puschmann, *J. Appl. Crystallogr.* **2009**, *42*, 339-341; b) G. Sheldrick, *Acta Crystallogr.* **2015**, *71*, 3-8.
- [S4] T. Iwamoto, Y. Watanabe, Y. Sakamoto, T. Suzuki, S. Yamago, *J. Am. Chem. Soc.* **2011**, *133*, 8354-8361.
- [S5] Gaussian 16, Revision C.01, M. J. Frisch, G. W. Trucks, H. B. Schlegel, G. E. Scuseria, M. A. Robb, J. R. Cheeseman, G. Scalmani, V. Barone, G. A. Petersson, H. Nakatsuji, X. Li, M. Caricato, A. V. Marenich, J. Bloino, B. G. Janesko, R. Gomperts, B. Mennucci, H. P. Hratchian, J. V. Ortiz, A. F. Izmaylov, J. L. Sonnenberg, D. Williams-Young, F. Ding, F. Lipparini, F. Egidi, J. Goings, B. Peng, A. Petrone, T. Henderson, D. Ranasinghe, V. G. Zakrzewski, J. Gao, N. Rega, G. Zheng, W. Liang, M. Hada, M. Ehara, K. Toyota, R. Fukuda, J. Hasegawa, M. Ishida, T. Nakajima, Y. Honda, O. Kitao, H. Nakai, T. Vreven, K. Throssell, J. A. Montgomery, Jr., J. E. Peralta, F. Ogliaro, M. J. Bearpark, J. J. Heyd, E. N. Brothers, K. N. Kudin, V. N. Staroverov, T. A. Keith, R. Kobayashi, J. Normand, K. Raghavachari, A. P. Rendell, J. C. Burant, S. S. Iyengar, J. Tomasi, M. Cossi, J. M. Millam, M. Klene, C. Adamo, R. Cammi, J. W. Ochterski, R. L. Martin, K. Morokuma, O. Farkas, J. B. Foresman, and D. J. Fox, Gaussian, Inc., Wallingford CT, 2019.
- [S6] P. J. Stephens, F. J. Devlin, C. F. Chabalowski, M. J. Frisch, *J. Phys. Chem.* **2002**, *98*, 11623-11627.
- [S7] a) F. Neese, *WIREs Comput. Mol. Sci.* **2011**, *2*, 73-78; b) F. Neese, *WIREs Comput. Mol. Sci.* **2018**, *8*, e1327.
- [S8] a) N. Mardirossian, M. Head-Gordon, *J. Chem. Phys.* **2016**, *144*; b) F. Weigend, R. Ahlrichs, *Phys. Chem. Chem. Phys.* **2005**, *7*, 3297-3305.
- [S9] F. Weigend, *Phys. Chem. Chem. Phys.* **2006**, *8*, 1057-1065.
- [S10] A. V. Marenich, C. J. Cramer, D. G. Truhlar, *J. Phys. Chem. B* **2009**, *113*, 6378-6396.
- [S11] T. Lu, Q. Chen, *Comput. Theor. Chem.* **2021**, *1200*, 113249.
- [S12] C. Y. CYLview20; Legault, Université de Sherbrooke, 2020 (<http://www.cylview.org>).
- [S13] T. Lu, F. Chen, *J. Comput. Chem.* **2012**, *33*, 580-592.
- [S14] W. Humphrey, A. Dalke, K. Schulten, *J. Mol. Graphics* **1996**, *14*, 33-38.
- [S15] Y. Segawa, H. Omachi, K. Itami, *Org. Lett.* **2010**, *12*, 2262-2265.

## 12. NMR spectra

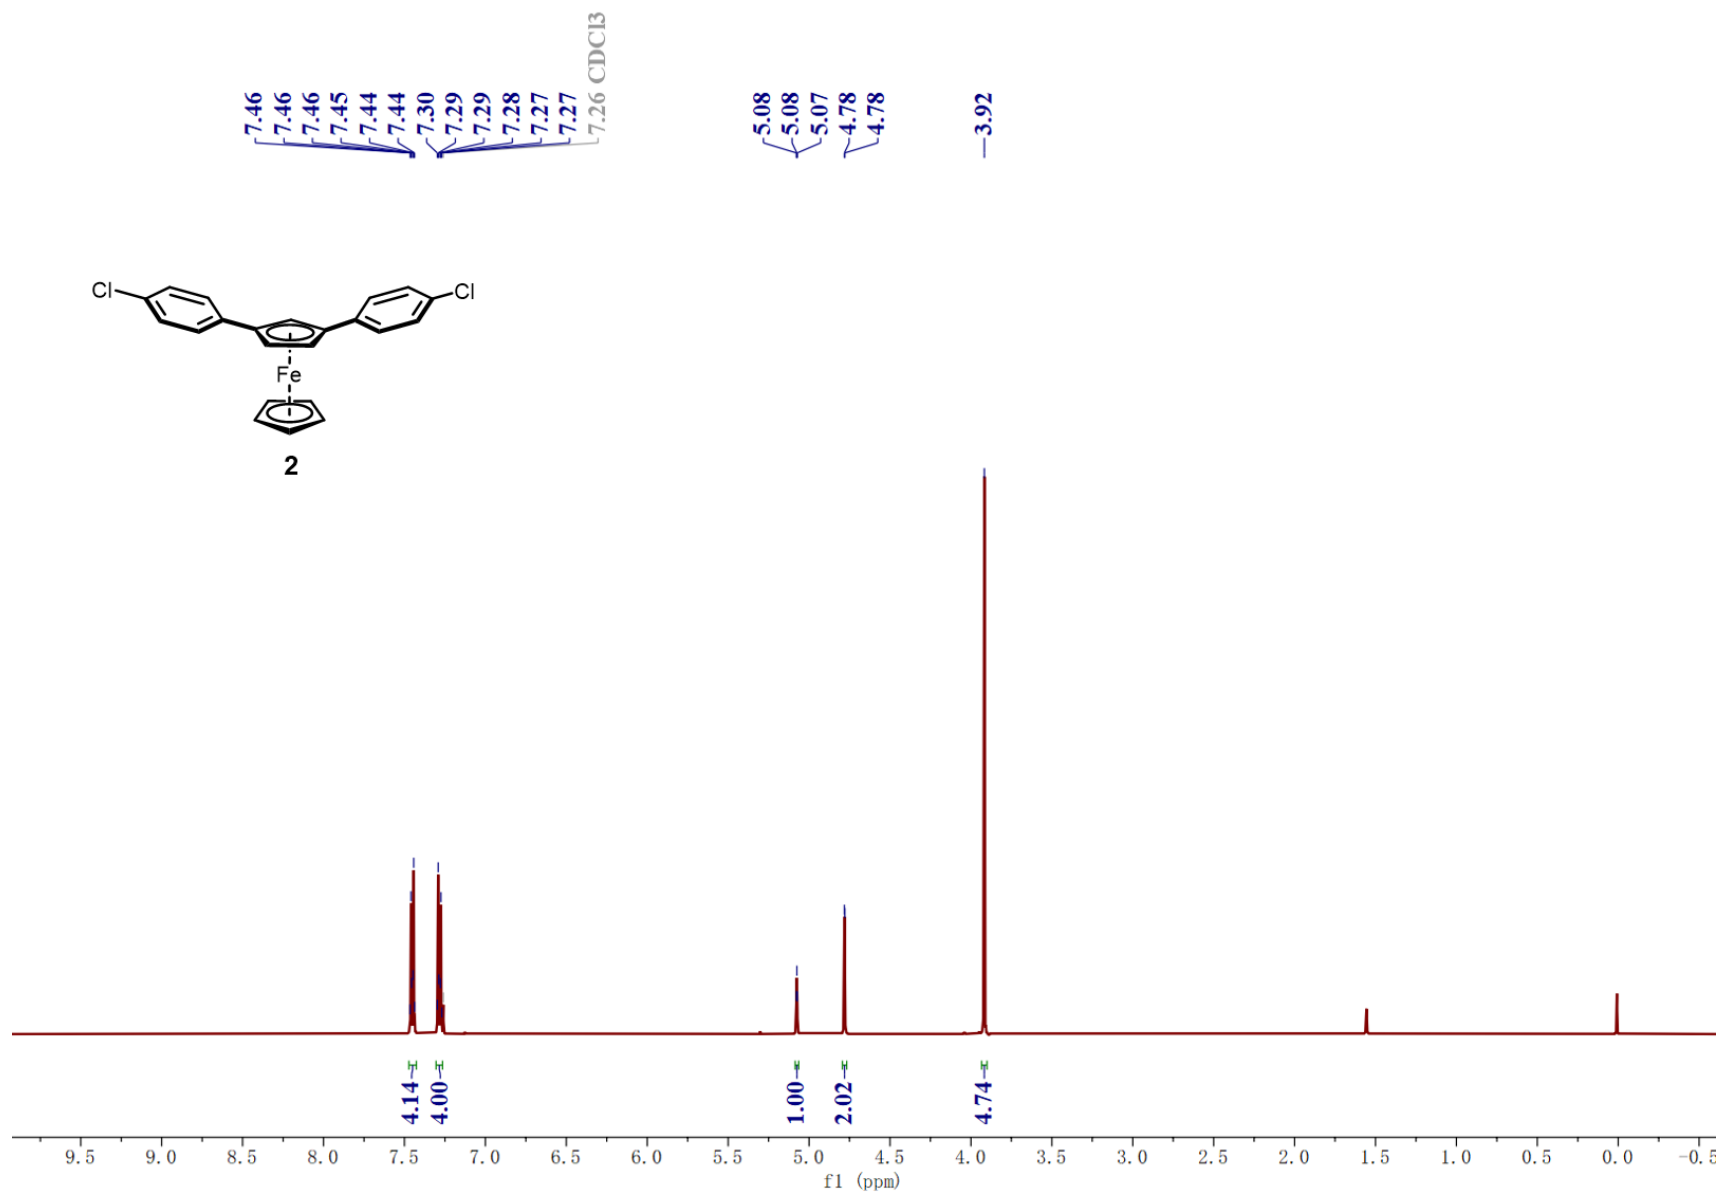

Figure S20. <sup>1</sup>H NMR (500 M) of 1,3-bis(4-chlorophenyl)ferrocene (2)

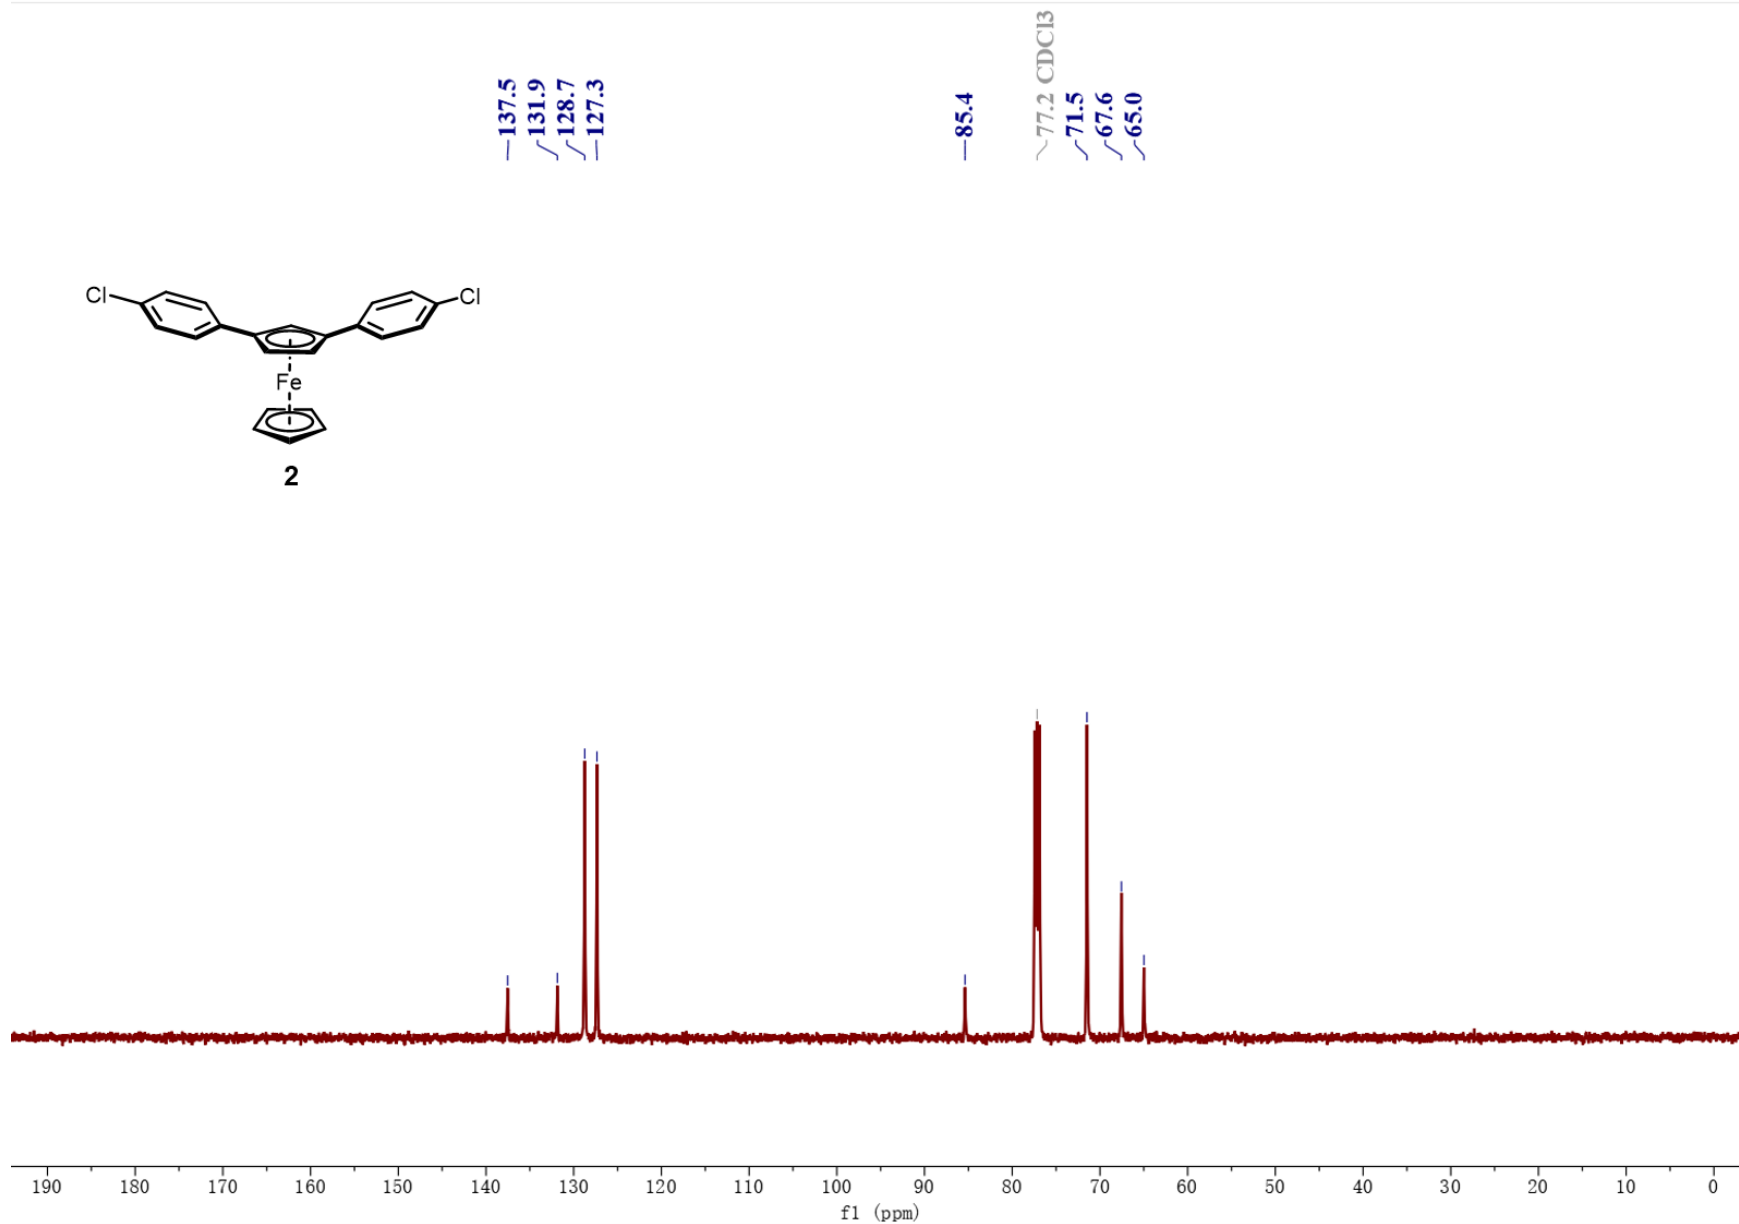

Figure S21. <sup>13</sup>C NMR (126 M) of 1,3-bis(4-chlorophenyl)ferrocene (2)

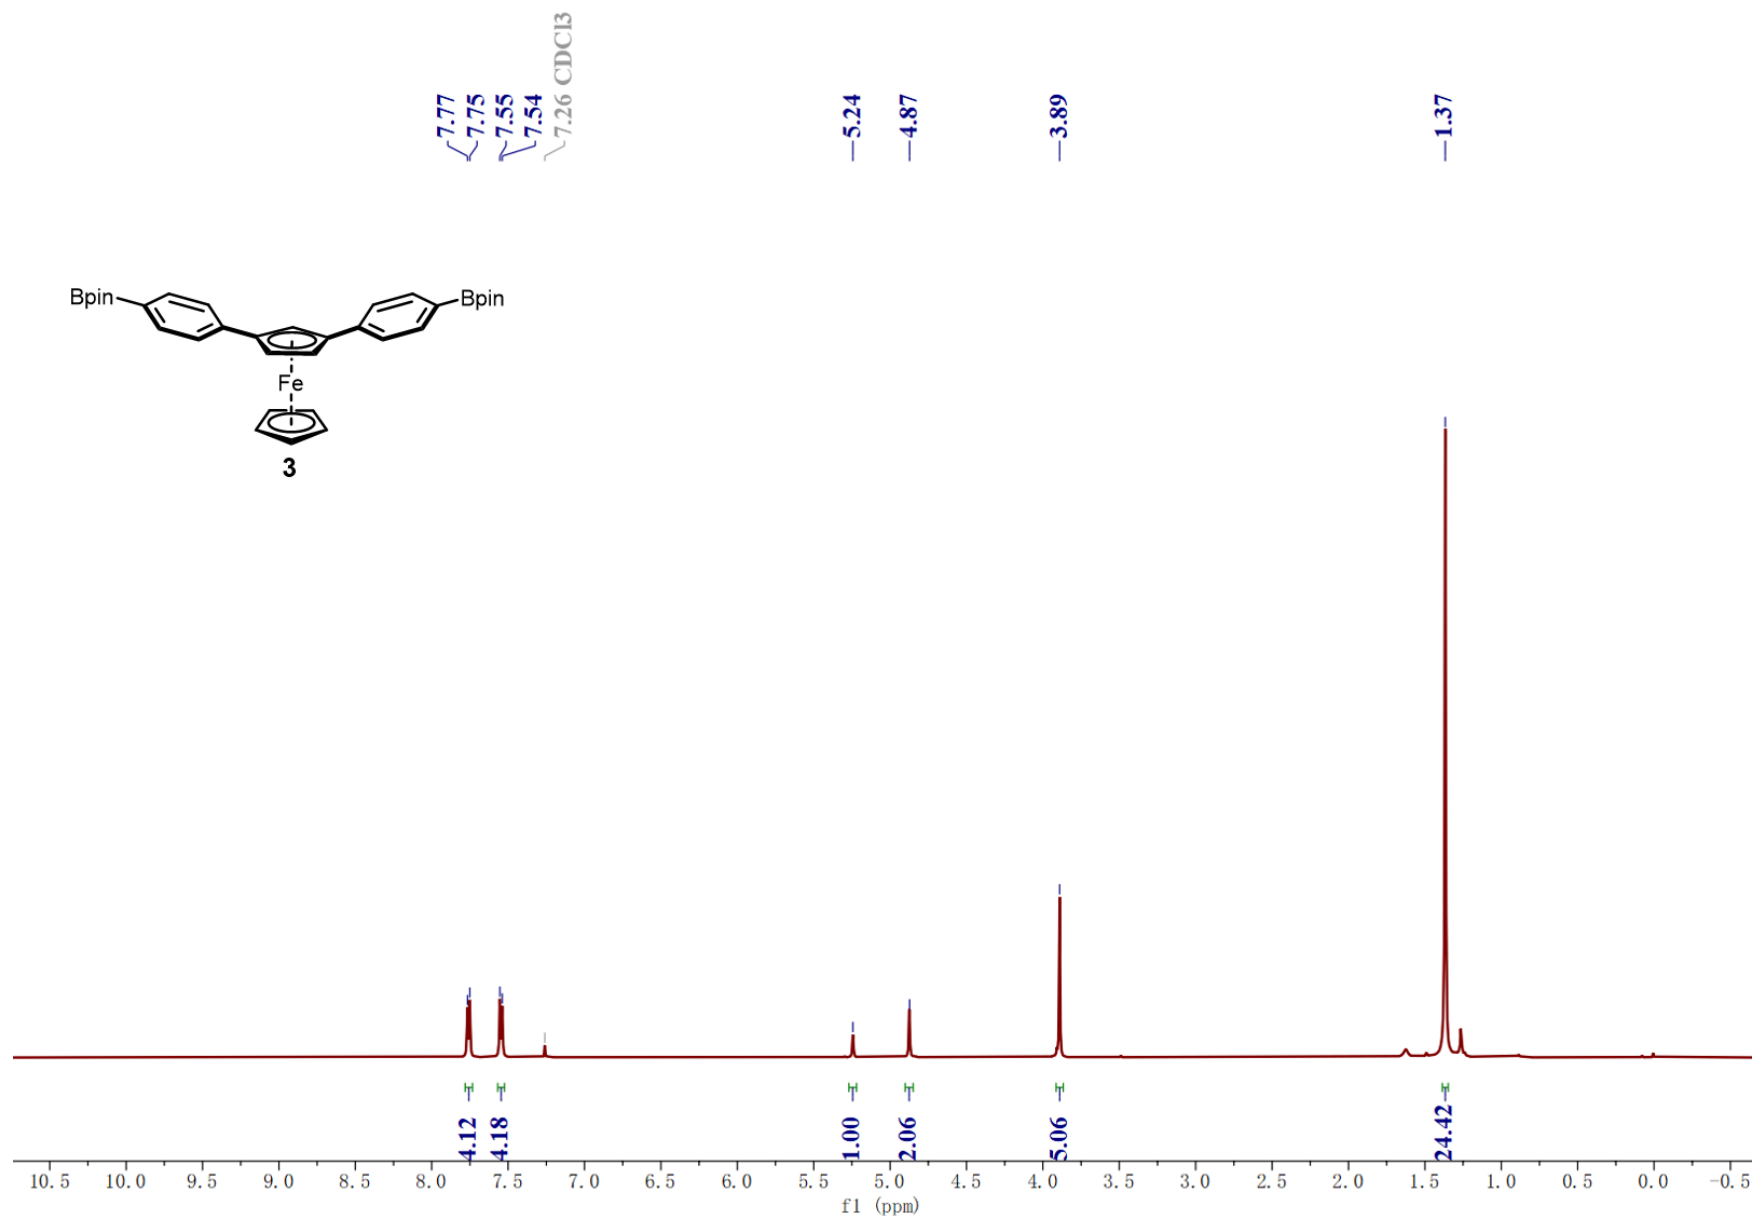

**Figure S22.** <sup>1</sup>H NMR (500 M) of 1,3-bis(4,4,5,5-tetramethyl-1,3,2-dioxaborolan-2-yl)ferrocene (3)

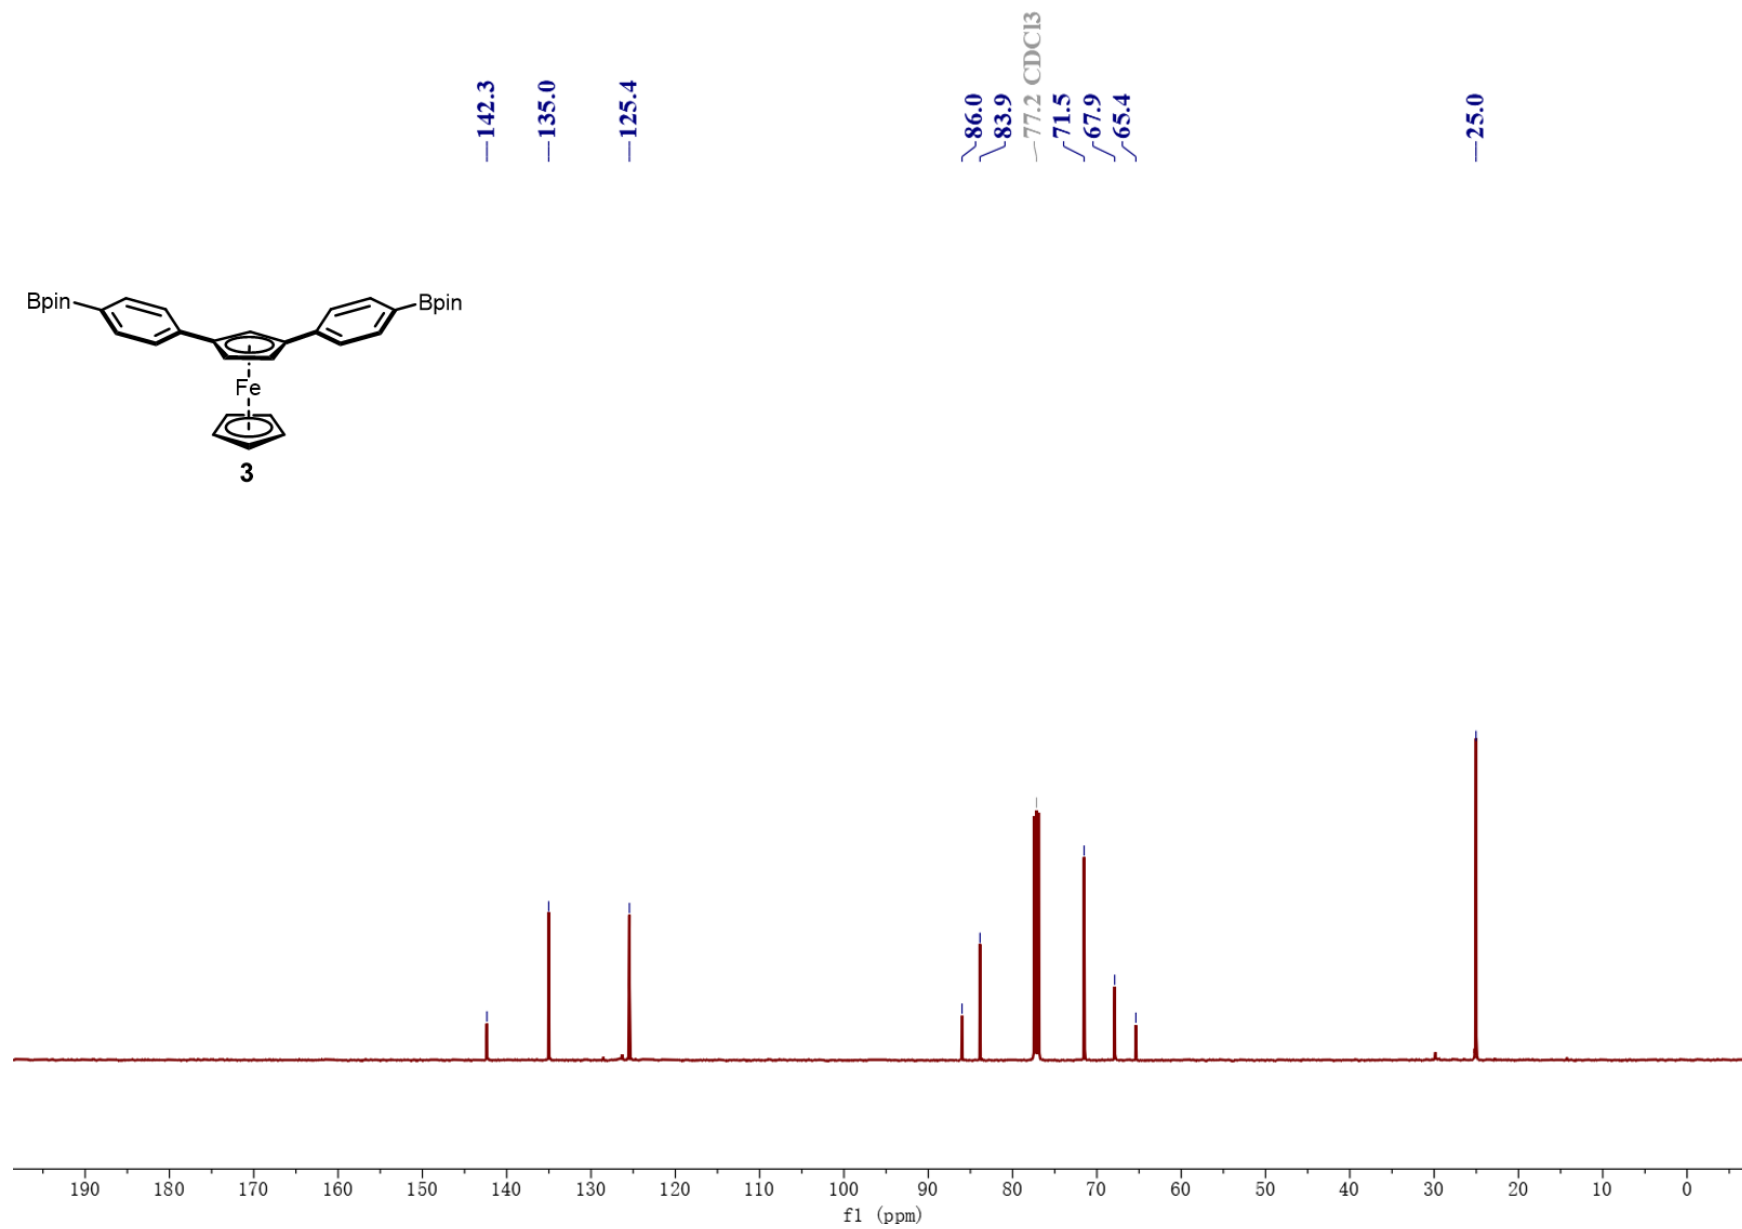

**Figure S23.** <sup>13</sup>C NMR (126 M) of 1,3-bis(4,4,5,5-tetramethyl-1,3,2-dioxaborolan-2-yl)ferrocene (**3**)

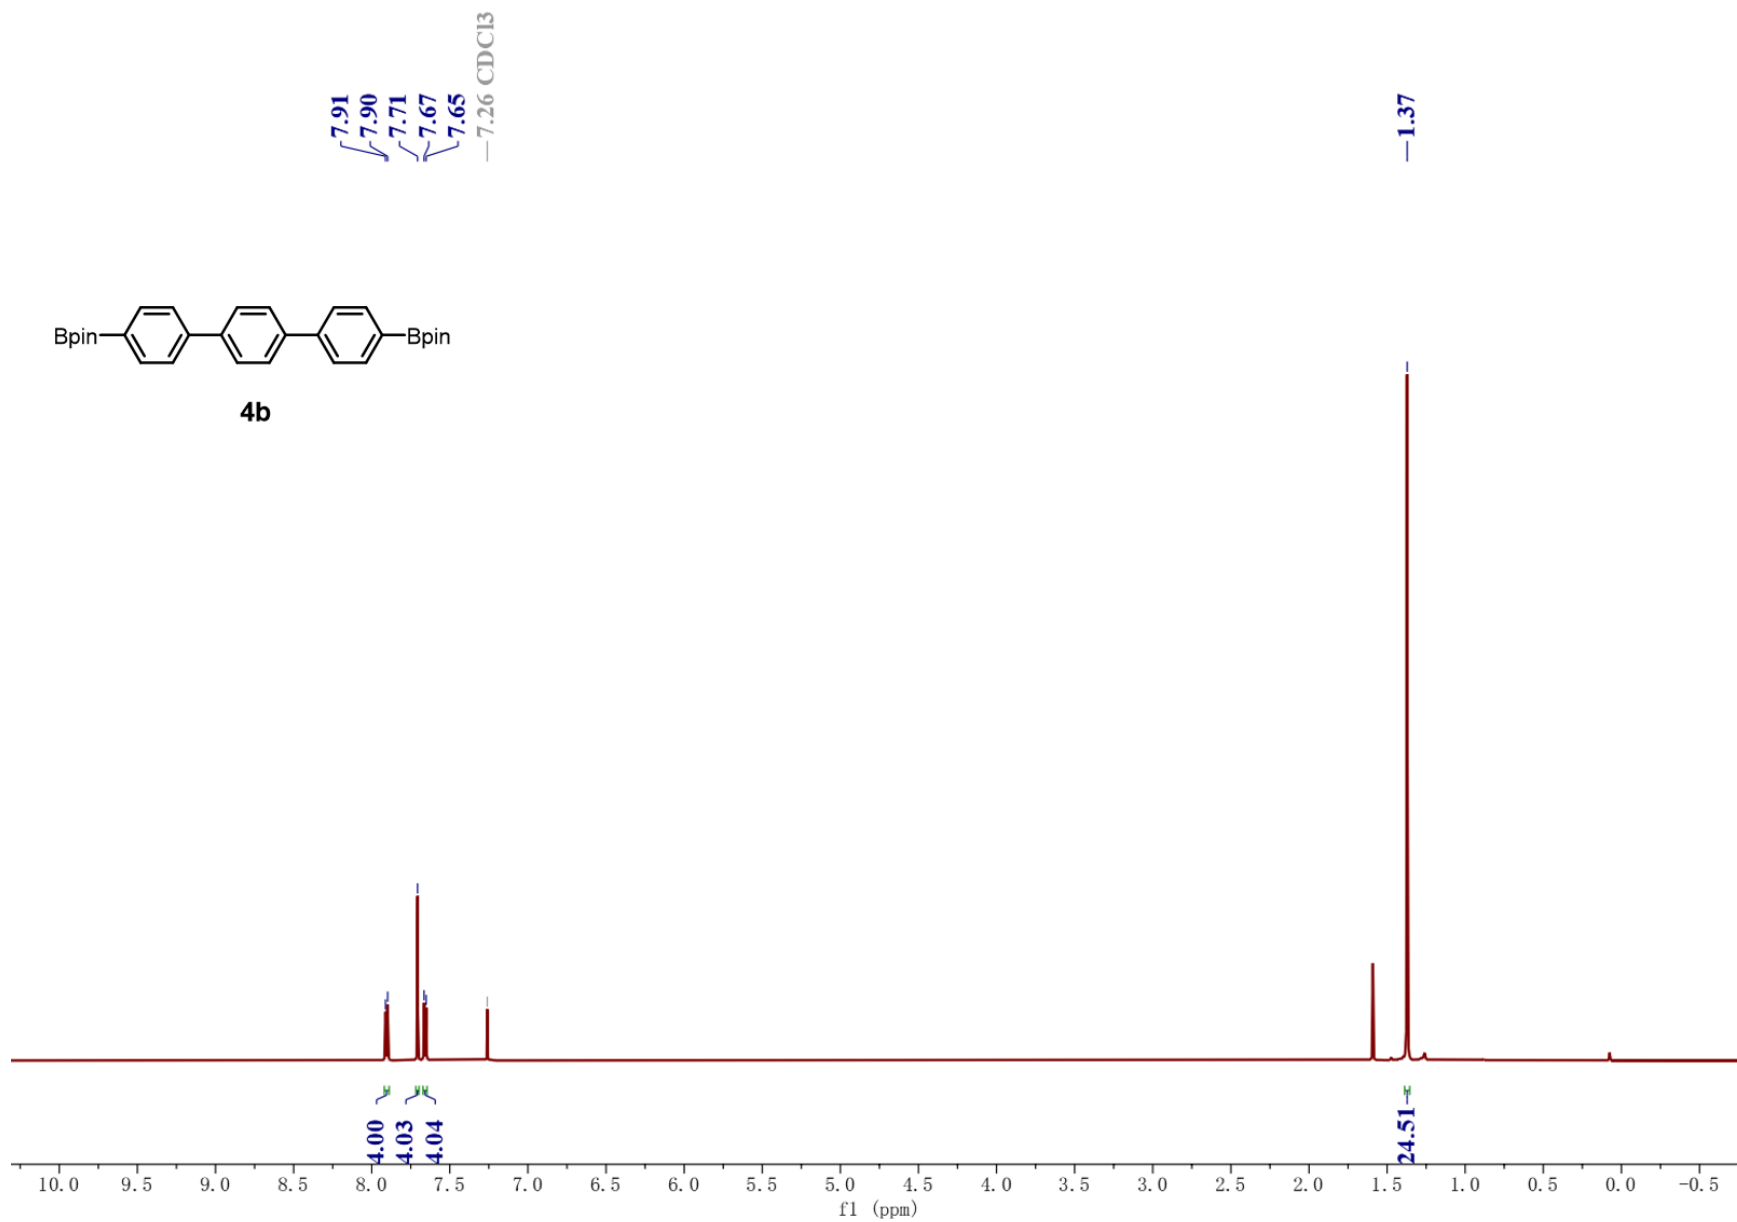

**Figure S24.** <sup>1</sup>H NMR (500 M) of **4b**

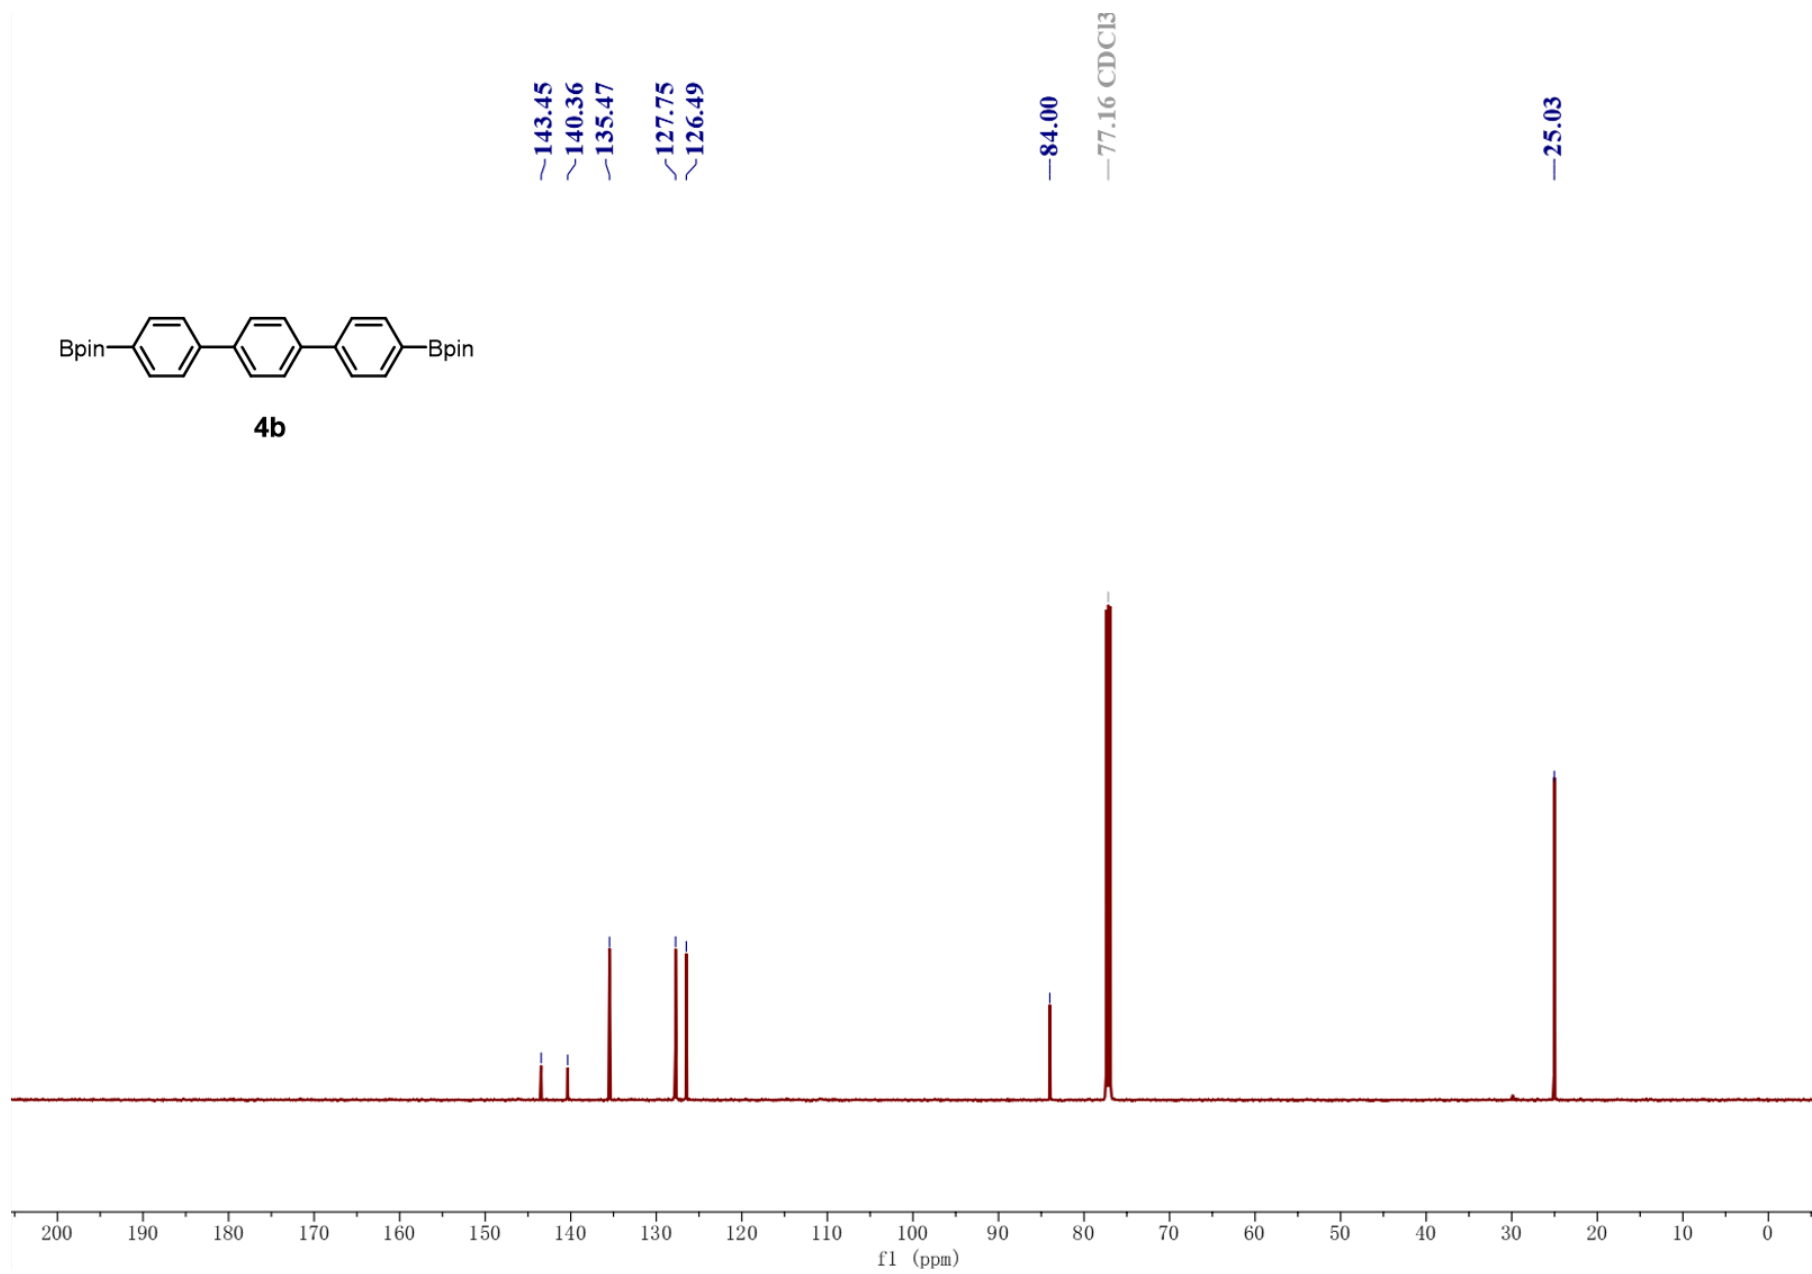

Figure S25. <sup>13</sup>C NMR (126 M) of **4b**



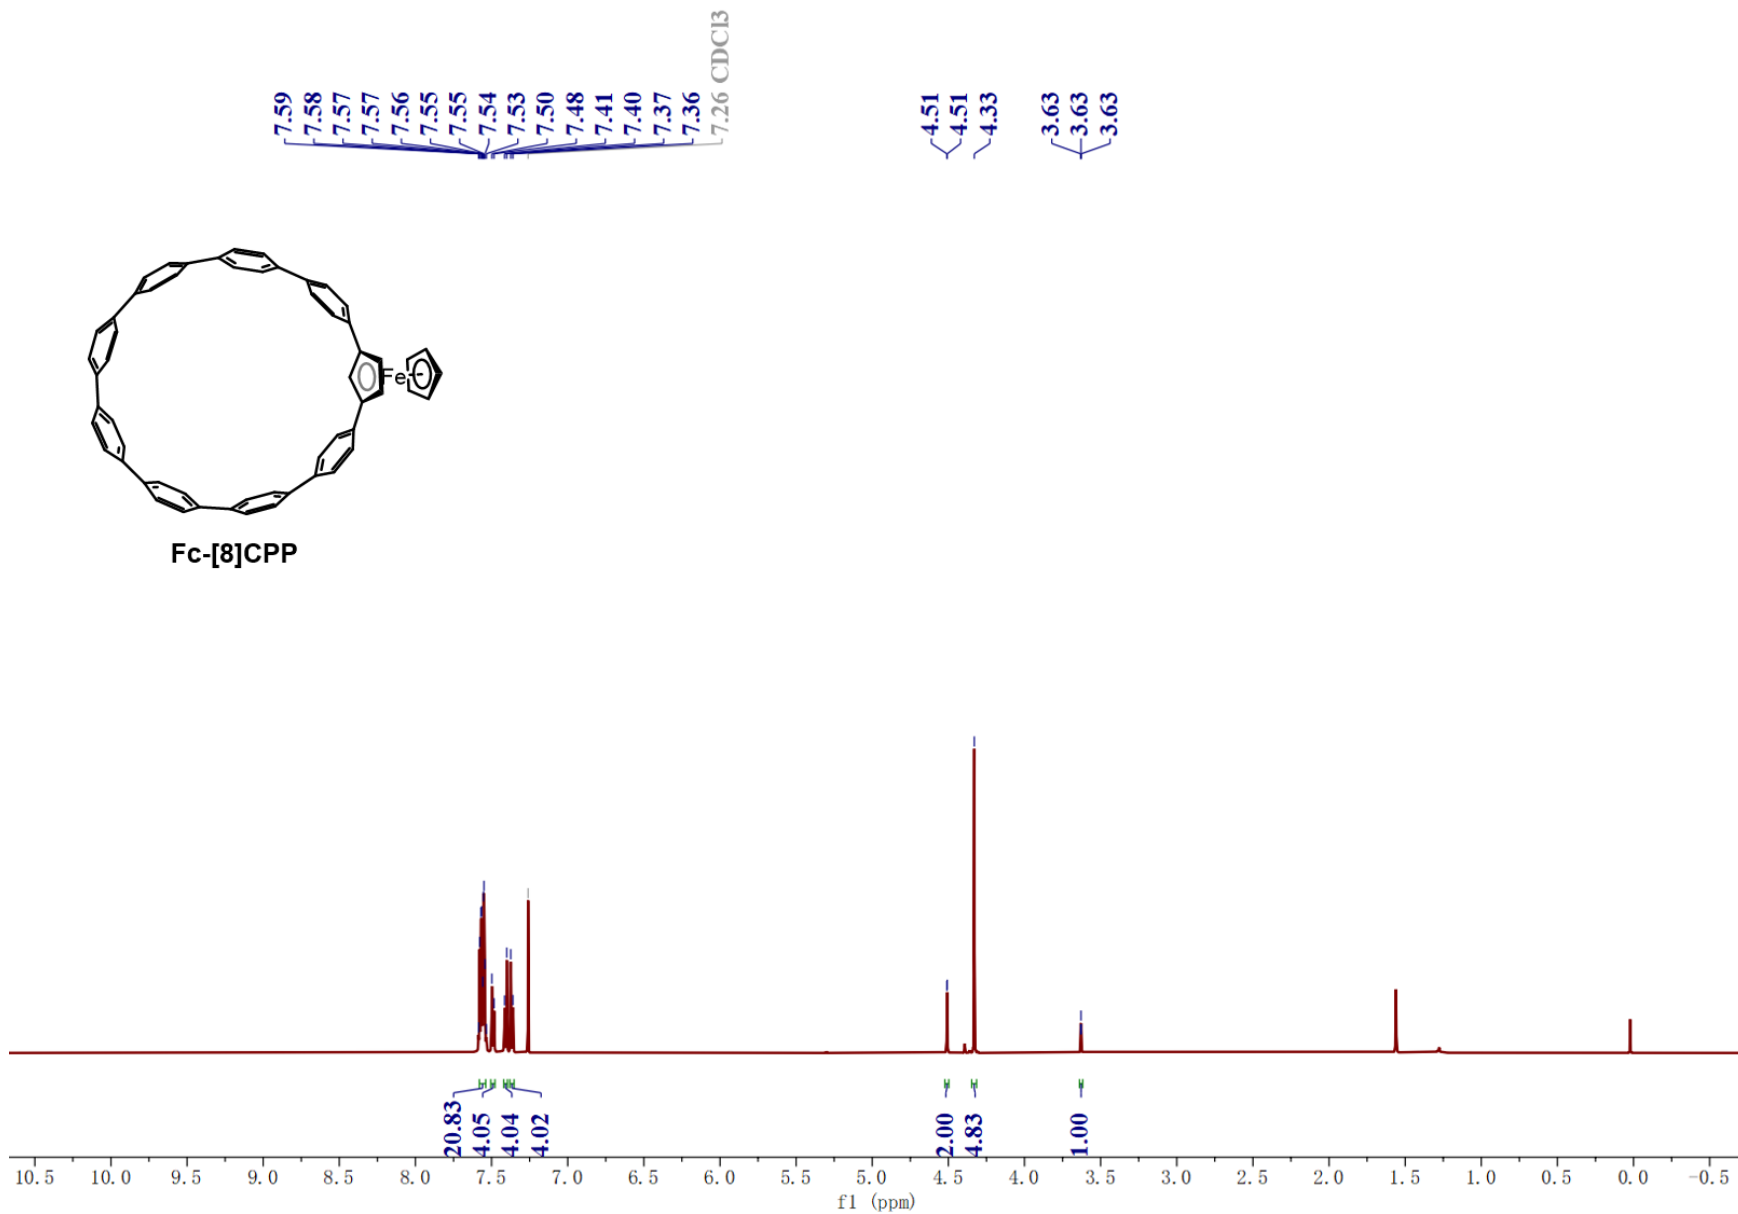

Figure S26.  $^1\text{H}$  NMR (600 M) of Fc-[8]CPP

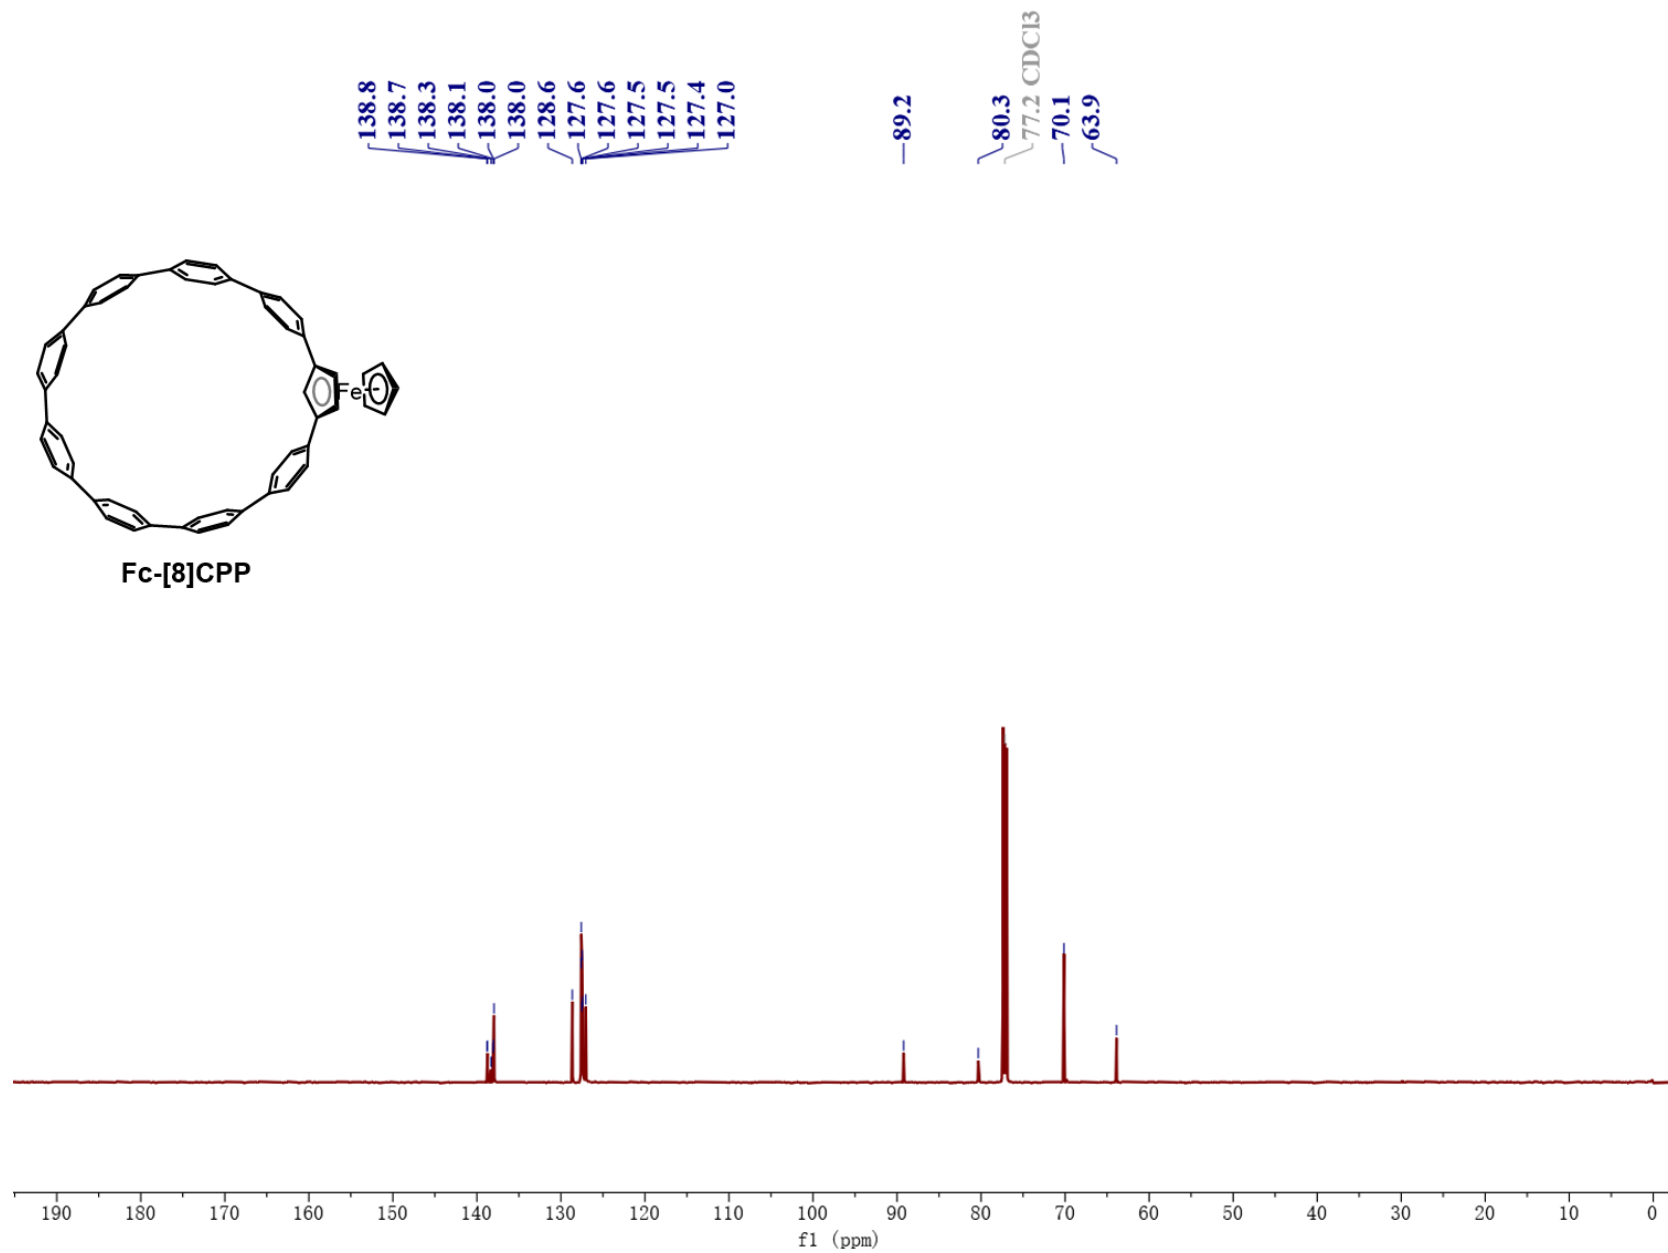

Figure S27. <sup>13</sup>C NMR (151 M) of Fc-[8]CPP



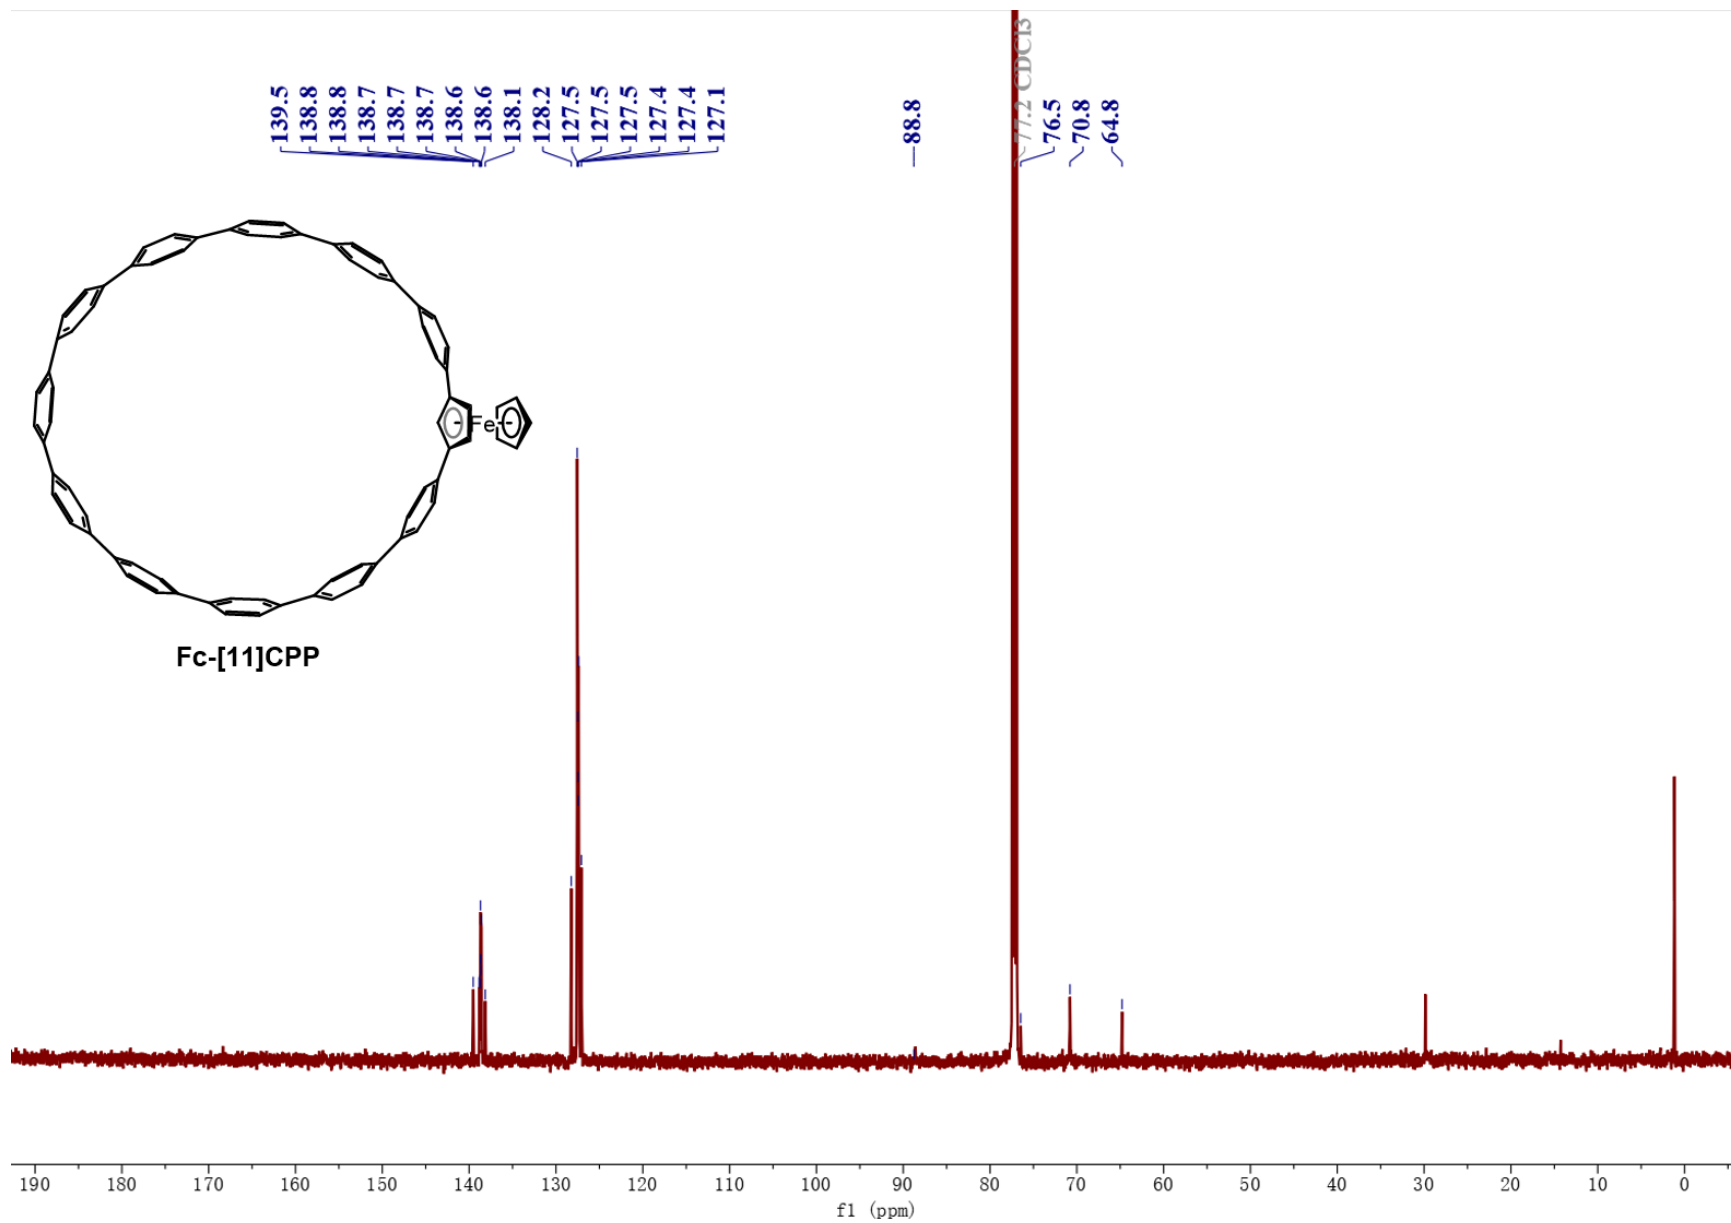

Figure S29. <sup>13</sup>C NMR (151 M) of Fc-[11]CPP

### 13. High-resolution mass spectra (HRMS)

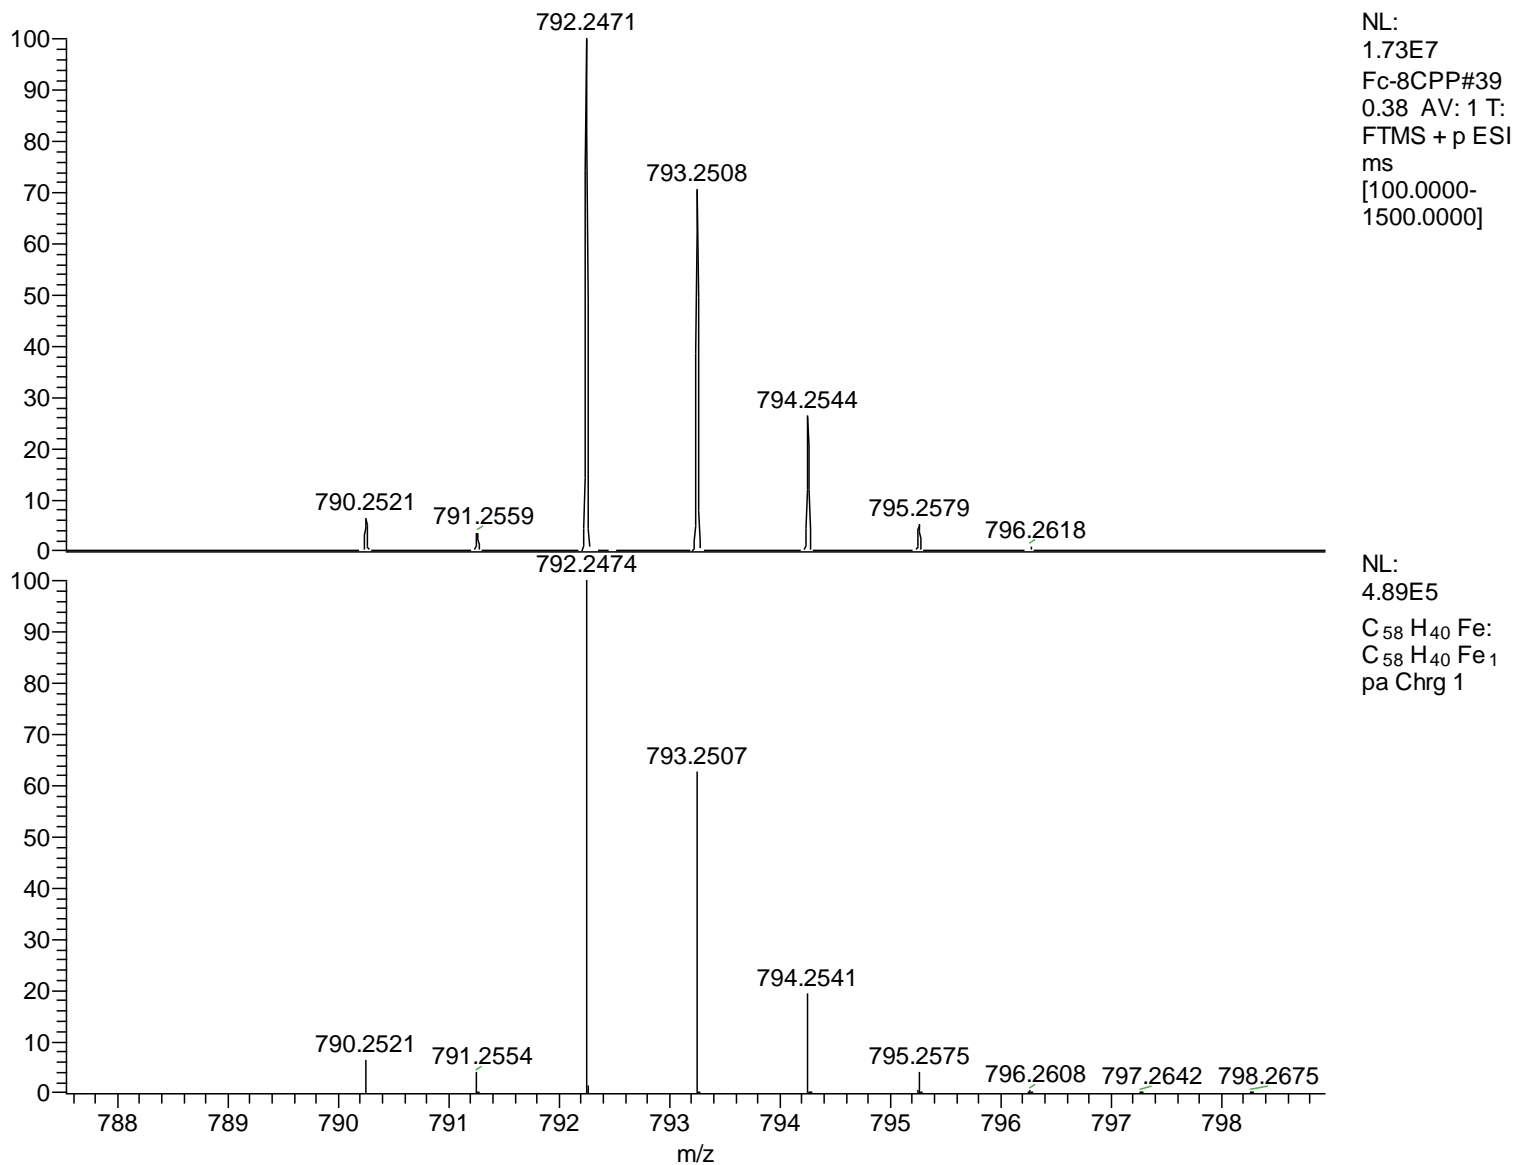

Figure S30. HRMS of Fc-[8]CPP (top, the measured; down, Simulated with C<sub>58</sub>H<sub>40</sub>Fe)

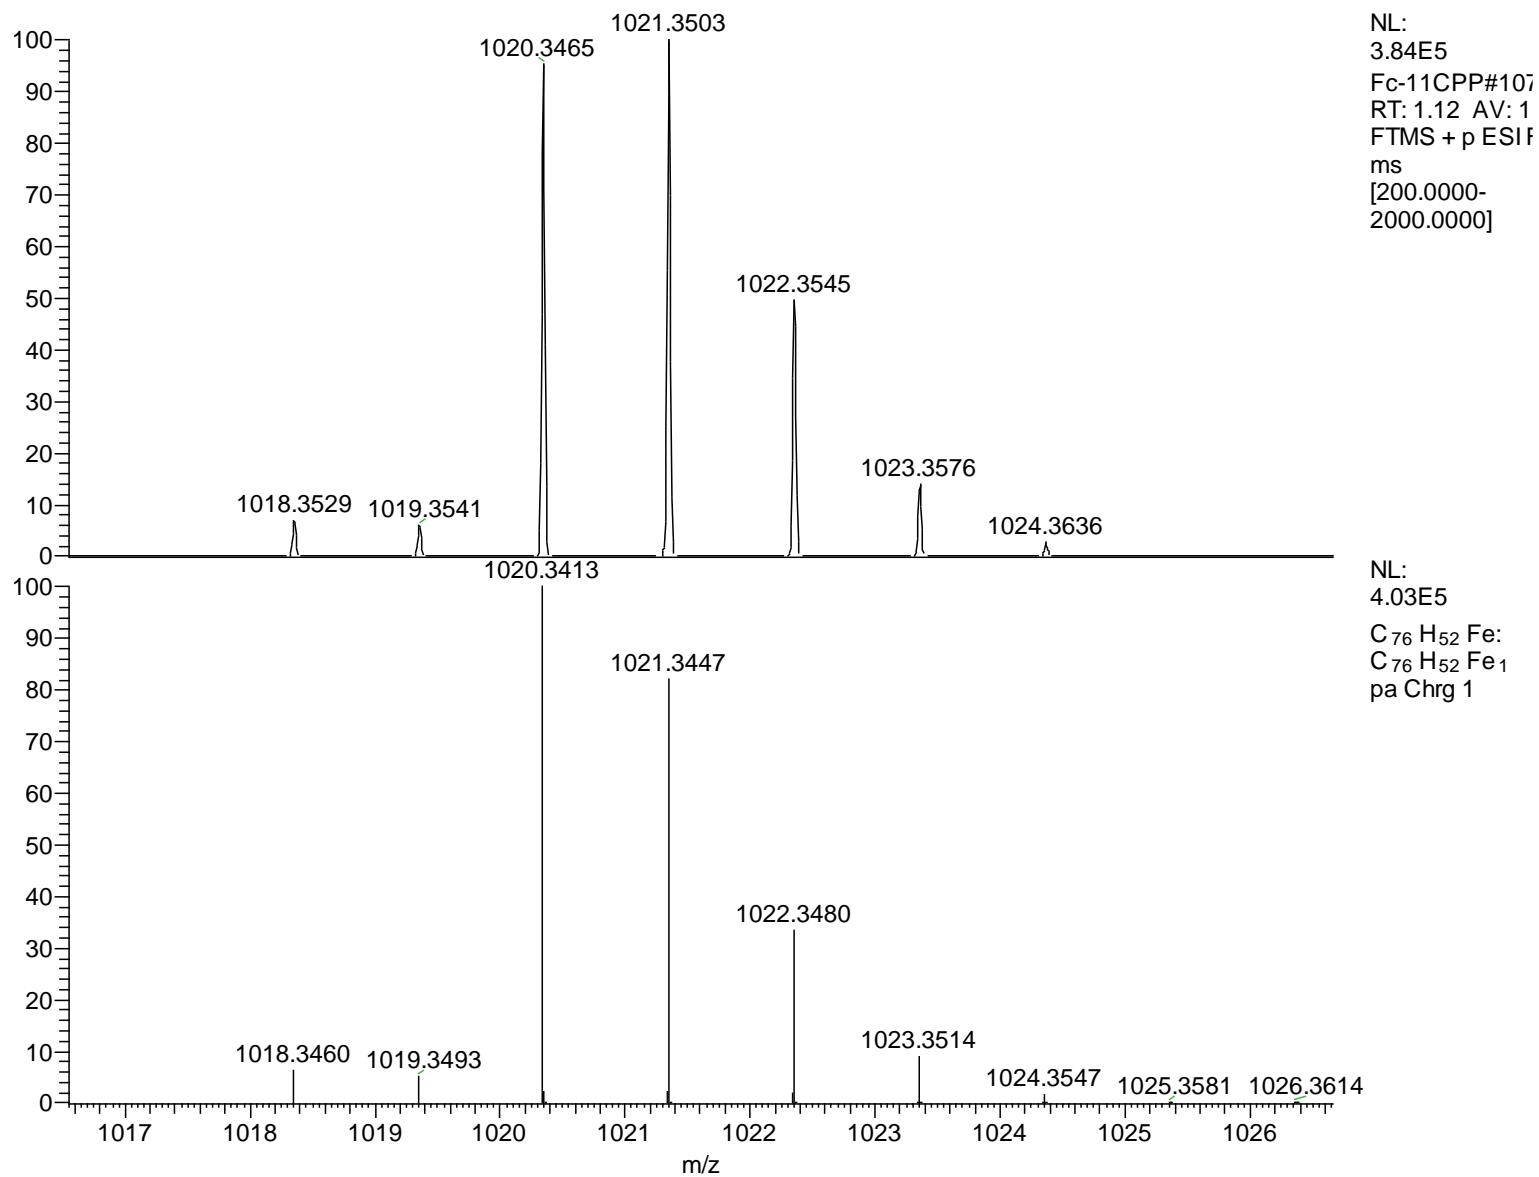

**Figure S31.** HRMS of Fc-[11]CPP (top, the measured; down, Simulated with C<sub>76</sub>H<sub>52</sub>Fe)

## 14. Maldi-tof mass spectra (HRMS)

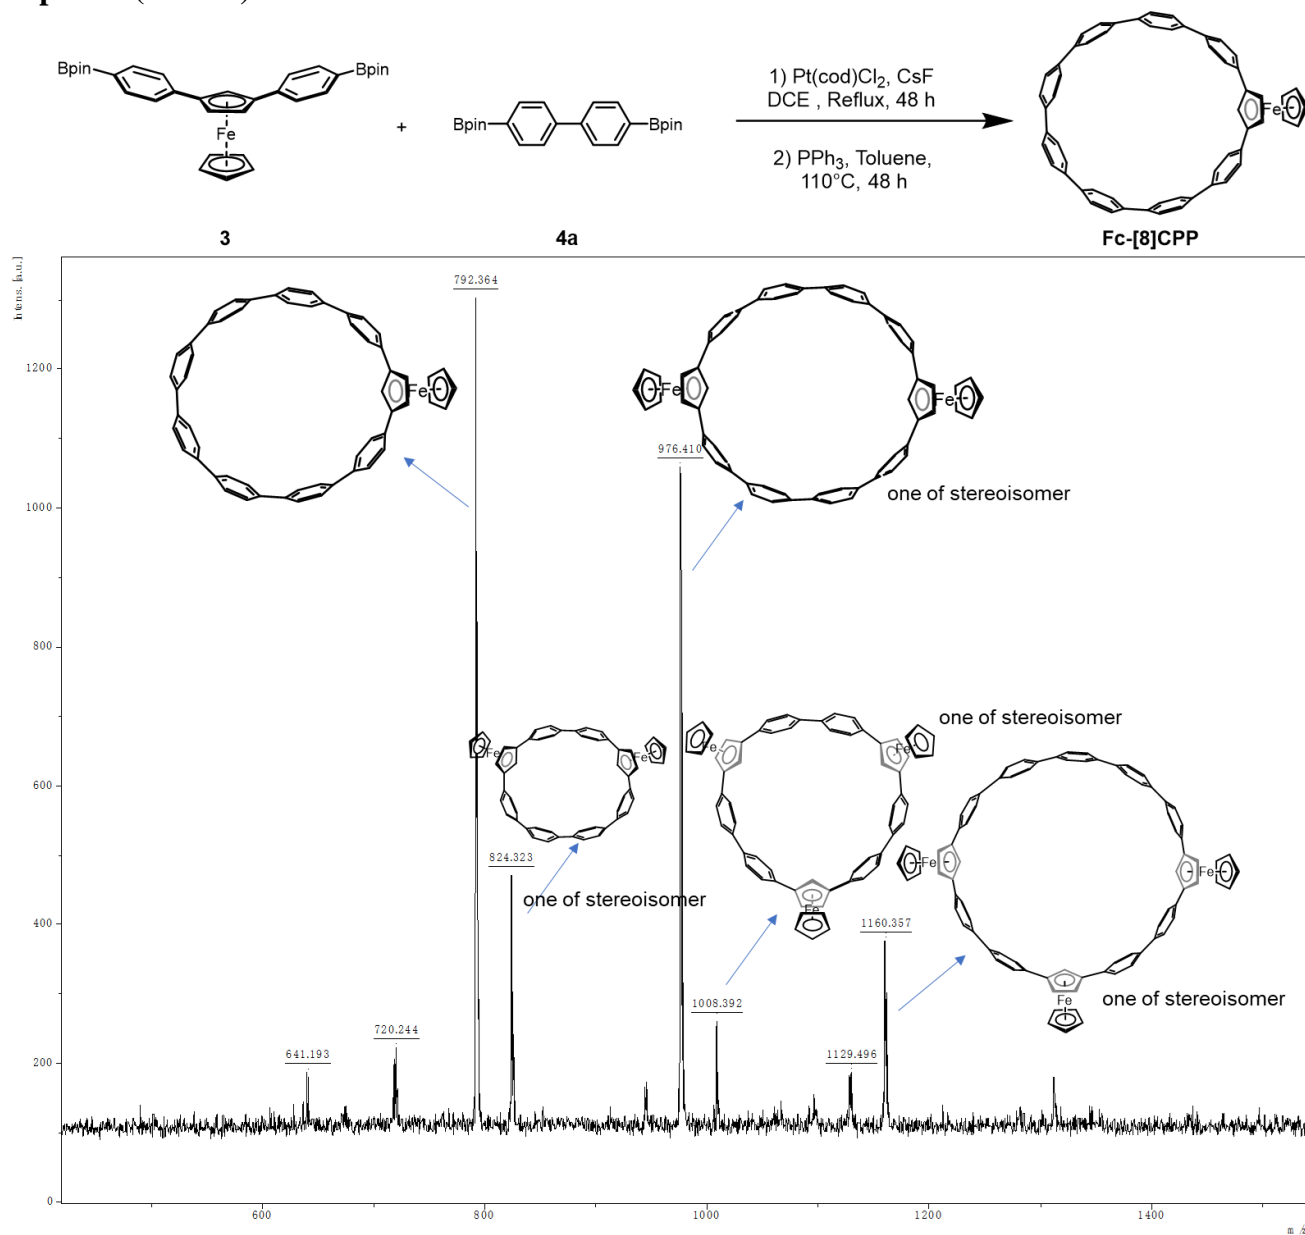

Figure S32. Maldi-tof MS of Fc-[8]CPP, di-Fc-CPPs and tri-Fc-CPPs
